# Supplementary material for: Combined analysis of the transcriptome and metabolome provides insights into the fleshy stem expansion mechanism in stem lettuce
Source: Front Plant Sci. 2022 Dec 15;13:1101199. doi: 10.3389/fpls.2022.1101199 (PMC9798005; doi:10.3389/fpls.2022.1101199)
Supplement: Supplementary file 3 [file Table_3.xlsx]

## Sheet: Sheet1
Table S3 Expression of transcription factor family at different expansion stages of fleshy stem in lettuce.
Transcription factor	Gene ID	S1	S2	S3	S4
LFY	Lsat_1_v5_gn_4_84380	0	0	0	0
S1Fa-like	Lsat_1_v5_gn_6_30301	46.6762	37.0253	42.6226	37.6639
SAP	Lsat_1_v5_gn_7_97180	0.104851	0	0	0
STAT	Lactuca_sativa_newGene_2217	5.18853	3.42164	3.60694	3.95704
EIL	Lsat_1_v5_gn_2_35880	23.9979	18.0882	17.4024	15.0139
EIL	Lsat_1_v5_gn_6_50081	18.1133	13.1725	13.345	11.7946
HB-PHD	Lsat_1_v5_gn_7_56301	25.0275	24.3472	26.6639	22.1501
HB-PHD	Lsat_1_v5_gn_9_111961	11.8751	9.25449	7.96618	5.965
NF-X1	Lsat_1_v5_gn_2_123440	16.9663	14.4973	17.0355	14.6444
NF-X1	Lsat_1_v5_gn_8_145600	9.78308	8.16289	7.85221	8.76819
VOZ	Lsat_1_v5_gn_1_120060	15.0032	11.5908	11.3117	12.7349
VOZ	Lsat_1_v5_gn_4_51560	30.3581	29.9267	22.6104	23.7665
VOZ	Lsat_1_v5_gn_7_21941	7.40478	2.59735	1.68105	1.38284
Whirly	Lsat_1_v5_gn_0_10341	19.4428	16.9884	14.213	12.2362
Whirly	Lsat_1_v5_gn_2_21740	0.153784	0.339903	0.468859	0.527121
Whirly	Lsat_1_v5_gn_3_50760	25.3095	15.6292	11.6062	10.0383
CPP	Lsat_1_v5_gn_5_104381	7.45095	5.63769	9.57865	5.36422
CPP	Lsat_1_v5_gn_5_31600	1.86917	1.51857	2.33683	1.17725
CPP	Lsat_1_v5_gn_6_22281	0	0	0	0
CPP	Lsat_1_v5_gn_6_22300	0	0	0	0
CPP	Lsat_1_v5_gn_7_42100	5.39312	3.92404	2.93042	3.05978
DBB	Lsat_1_v5_gn_1_77880	40.1056	72.8185	102.909	92.6835
DBB	Lsat_1_v5_gn_5_125200	0.377954	0.230301	0.349115	1.3404
DBB	Lsat_1_v5_gn_5_126341	1.92755	2.75866	1.97346	1.23695
DBB	Lsat_1_v5_gn_5_26000	33.5595	19.9014	24.1778	21.1008
DBB	Lsat_1_v5_gn_7_92040	0.715752	1.79519	2.00523	2.28089
C2C2-LSD	Lsat_1_v5_gn_3_16800	74.6267	51.101	66.7276	48.2337
C2C2-LSD	Lsat_1_v5_gn_5_84081	42.7257	42.2981	51.3354	83.2404
C2C2-LSD	Lsat_1_v5_gn_6_78520	5.76796	14.4919	1.54304	2.19263
C2C2-LSD	Lsat_1_v5_gn_7_21141	11.201	10.8278	10.8582	8.44786
C2C2-LSD	Lsat_1_v5_gn_7_55201	7.02384	5.85983	4.87906	4.48514
C2C2-LSD	Lsat_1_v5_gn_8_68441	12.6395	9.25787	8.56759	7.13846
CAMTA	Lsat_1_v5_gn_1_40580	6.11779	5.21915	4.72188	5.41562
CAMTA	Lsat_1_v5_gn_1_43941	16.1393	16.7917	18.8988	23.8676
CAMTA	Lsat_1_v5_gn_3_30720	23.8484	16.6309	19.3864	15.5999
CAMTA	Lsat_1_v5_gn_4_660	27.2528	21.2136	25.8456	30.0692
CAMTA	Lsat_1_v5_gn_5_48440	55.3711	52.4345	53.1492	71.3967
CAMTA	Lsat_1_v5_gn_6_114260	40.1943	29.105	27.9455	27.5517
CAMTA	Lsat_1_v5_gn_8_147761	14.7998	24.6089	20.2076	36.4795
SRS	Lsat_1_v5_gn_1_16440	3.1989	5.20844	3.96763	4.0597
SRS	Lsat_1_v5_gn_2_33180	16.1545	11.755	8.00388	7.43195
SRS	Lsat_1_v5_gn_3_110380	6.4791	0.137275	0.16784	0.103478
SRS	Lsat_1_v5_gn_4_149681	18.5707	7.3809	13.7825	4.55542
SRS	Lsat_1_v5_gn_5_120141	0.681689	0.0550833	0	0.0997463
SRS	Lsat_1_v5_gn_5_26401	0.370695	0.033563	0.00739433	0
SRS	Lsat_1_v5_gn_6_67960	9.86757	6.13119	5.4199	5.49284
BBR-BPC	Lsat_1_v5_gn_3_61240	40.1673	28.3879	31.1603	24.4918
BBR-BPC	Lsat_1_v5_gn_3_73960	23.9612	20.2695	20.052	16.0125
BBR-BPC	Lsat_1_v5_gn_4_17781	0	0	0	0
BBR-BPC	Lsat_1_v5_gn_4_22580	30.241	11.2125	17.7918	11.1139
BBR-BPC	Lsat_1_v5_gn_5_26240	31.1782	19.1953	24.1363	17.9219
BBR-BPC	Lsat_1_v5_gn_6_17761	1.79144	0.813132	2.02897	0.836125
BBR-BPC	Lsat_1_v5_gn_8_127060	16.584	10.2593	13.9951	9.2091
BBR-BPC	Lsat_1_v5_gn_8_34460	3.37352	0.580555	0.914929	0.480927
E2F-DP	Lactuca_sativa_newGene_6301	1.61089	0.507621	0.944208	0.635507
E2F-DP	Lsat_1_v5_gn_0_24320	2.5147	1.15891	1.65362	0.7893
E2F-DP	Lsat_1_v5_gn_1_52320	23.3978	16.5958	18.4	17.2477
E2F-DP	Lsat_1_v5_gn_2_106920	0	0.0306967	0.0820633	0.080154
E2F-DP	Lsat_1_v5_gn_2_35961	3.84712	3.67411	2.38111	1.93735
E2F-DP	Lsat_1_v5_gn_2_55341	4.37932	3.98664	3.50458	2.49958
E2F-DP	Lsat_1_v5_gn_5_17941	2.44119	1.0616	1.73426	0.909804
E2F-DP	Lsat_1_v5_gn_6_24981	23.9499	26.3046	29.6178	30.6407
E2F-DP	Lsat_1_v5_gn_6_35080	6.24657	7.61469	5.19652	4.12746
C2C2-YABBY	Lsat_1_v5_gn_0_27800	0.052007	0	0.0252917	0
C2C2-YABBY	Lsat_1_v5_gn_3_128981	1.62517	0.0526903	0	0.0382897
C2C2-YABBY	Lsat_1_v5_gn_3_3040	1.93121	0.406103	0.122057	0.194116
C2C2-YABBY	Lsat_1_v5_gn_3_53601	0.017369	0.013689	0.00657333	0.005481
C2C2-YABBY	Lsat_1_v5_gn_5_94941	5.38017	2.08456	0.182106	0.57114
C2C2-YABBY	Lsat_1_v5_gn_6_2400	2.21961	0.639081	0.237738	0.727117
C2C2-YABBY	Lsat_1_v5_gn_7_43360	0.057132	0	0	0
C2C2-YABBY	Lsat_1_v5_gn_7_9041	5.87447	0.427715	0.0339393	0.255958
C2C2-YABBY	Lsat_1_v5_gn_8_58340	0	0	0	0
BES1	Lsat_1_v5_gn_1_18200	14.1879	8.9087	11.5041	8.26907
BES1	Lsat_1_v5_gn_2_79760	74.7869	84.4358	83.0039	84.2506
BES1	Lsat_1_v5_gn_3_20620	11.4519	6.95359	7.55489	7.46638
BES1	Lsat_1_v5_gn_4_122280	23.7384	22.3966	21.7434	15.3515
BES1	Lsat_1_v5_gn_4_49401	11.5218	14.8623	17.2886	34.7055
BES1	Lsat_1_v5_gn_5_29981	13.7508	7.55246	6.02932	6.74712
BES1	Lsat_1_v5_gn_7_102101	14.8449	13.997	3.37491	2.37476
BES1	Lsat_1_v5_gn_7_25281	46.7355	160.701	155.452	203.845
BES1	Lsat_1_v5_gn_7_4541	9.2716	7.52973	7.18011	6.01178
BES1	Lsat_1_v5_gn_8_103401	0	0.109777	0.087869	0
BES1	Lsat_1_v5_gn_9_100541	36.0934	27.3029	40.0409	40.872
HB-other	Lactuca_sativa_newGene_1845	21.4292	24.9974	20.1242	13.5937
HB-other	Lsat_1_v5_gn_2_33621	17.0332	13.7914	14.6705	12.0594
HB-other	Lsat_1_v5_gn_3_78821	14.0752	1.06334	1.47516	0.668989
HB-other	Lsat_1_v5_gn_4_51721	40.1191	40.4672	52.1785	49.8235
HB-other	Lsat_1_v5_gn_4_9600	0	0	0	0
HB-other	Lsat_1_v5_gn_5_127561	5.94194	0.0674843	0.059553	0.0312027
HB-other	Lsat_1_v5_gn_5_30481	10.0107	7.66221	5.52234	4.00281
HB-other	Lsat_1_v5_gn_6_32880	0.01241	0	0.0320293	0
HB-other	Lsat_1_v5_gn_7_15020	44.7028	45.5507	66.4711	65.1088
HB-other	Lsat_1_v5_gn_7_22781	9.9939	11.3996	10.3756	9.60736
HB-other	Lsat_1_v5_gn_8_133600	30.7948	26.0141	25.6719	21.981
HB-other	Lsat_1_v5_gn_8_54500	9.40658	7.41607	6.94036	5.65889
CO-like	Lsat_1_v5_gn_0_37380	24.1938	51.8683	31.5234	49.4206
CO-like	Lsat_1_v5_gn_2_86121	1.2919	13.09	15.2749	12.0392
CO-like	Lsat_1_v5_gn_3_59241	19.8826	13.1767	3.16804	1.62688
CO-like	Lsat_1_v5_gn_4_175001	0.0128227	0.016467	0.012917	0
CO-like	Lsat_1_v5_gn_5_122401	29.9965	13.2048	7.70588	5.04446
CO-like	Lsat_1_v5_gn_5_51381	123.307	93.4584	85.4781	66.2754
CO-like	Lsat_1_v5_gn_5_86540	2.71377	39.7096	44.1127	49.565
CO-like	Lsat_1_v5_gn_7_6501	5.50131	8.30774	11.8496	7.53205
CO-like	Lsat_1_v5_gn_7_97240	22.3302	6.48376	5.29074	4.24513
CO-like	Lsat_1_v5_gn_8_146440	7.20697	6.71781	3.08271	2.90768
CO-like	Lsat_1_v5_gn_8_66520	0.0459967	1.83033	3.05191	4.70676
CO-like	Lsat_1_v5_gn_9_102721	16.1571	4.10729	1.34758	0.821615
CO-like	Lsat_1_v5_gn_9_4901	8.70037	12.3938	7.2551	4.76786
GRF	Lsat_1_v5_gn_2_135541	5.37137	2.59995	3.37227	1.1679
GRF	Lsat_1_v5_gn_3_14660	0.960653	0.113933	0.239202	0.210316
GRF	Lsat_1_v5_gn_3_85521	1.86902	1.10353	0.300266	0.0603243
GRF	Lsat_1_v5_gn_4_159961	5.30668	0.977282	1.04027	0.560991
GRF	Lsat_1_v5_gn_4_92941	6.44511	1.95887	2.79337	1.52491
GRF	Lsat_1_v5_gn_5_141200	16.8494	5.48059	2.72339	1.53845
GRF	Lsat_1_v5_gn_6_10680	2.20883	0.922517	0.106372	0.266005
GRF	Lsat_1_v5_gn_6_17460	2.47332	0.559205	0.489425	0.202107
GRF	Lsat_1_v5_gn_6_70601	3.74387	0.0446713	0.009167	0.060005
GRF	Lsat_1_v5_gn_6_75441	9.39906	3.04932	2.71952	1.71371
GRF	Lsat_1_v5_gn_6_81681	1.77524	5.67302	2.66699	4.74214
GRF	Lsat_1_v5_gn_8_86361	4.3106	0.67958	1.66963	0.532326
GRF	Lsat_1_v5_gn_9_78540	6.38245	1.75952	1.74726	0.94557
GeBP	Lsat_1_v5_gn_0_41020	0	0.0148987	0.084598	0.014918
GeBP	Lsat_1_v5_gn_0_7020	0.0917633	0.0783977	0	0
GeBP	Lsat_1_v5_gn_1_125380	39.5456	26.4119	27.9113	22.3628
GeBP	Lsat_1_v5_gn_1_130540	0	0	0	0
GeBP	Lsat_1_v5_gn_1_130720	0	0	0	0
GeBP	Lsat_1_v5_gn_1_81901	70.847	70.2472	51.6721	49.9167
GeBP	Lsat_1_v5_gn_2_66580	25.6697	23.5378	29.0965	25.8387
GeBP	Lsat_1_v5_gn_2_69421	39.6325	51.4111	253.599	223.474
GeBP	Lsat_1_v5_gn_3_43101	22.8549	21.4021	25.3868	19.4404
GeBP	Lsat_1_v5_gn_5_179580	13.5301	7.06162	8.24897	6.50911
GeBP	Lsat_1_v5_gn_7_18320	56.6555	41.1309	37.4667	31.9736
GeBP	Lsat_1_v5_gn_7_4180	0.519898	0.150173	0.212678	0.087802
GeBP	Lsat_1_v5_gn_7_4941	0	0	0	0
ARR-B	Lsat_1_v5_gn_1_44261	29.5631	36.3121	26.5324	33.6536
ARR-B	Lsat_1_v5_gn_4_2361	1.55634	0.287055	0.194117	0.153563
ARR-B	Lsat_1_v5_gn_5_39921	30.9547	25.6882	29.168	22.6588
ARR-B	Lsat_1_v5_gn_5_73301	70.1269	74.3825	84.032	67.2605
ARR-B	Lsat_1_v5_gn_5_90980	9.17155	8.86063	9.14578	13.3166
ARR-B	Lsat_1_v5_gn_6_115080	7.20571	4.48326	2.55602	1.51399
ARR-B	Lsat_1_v5_gn_6_19461	1.35036	0.323785	0.313569	0.113236
ARR-B	Lsat_1_v5_gn_8_165120	0	0	0	0
ARR-B	Lsat_1_v5_gn_8_35440	29.9705	32.1679	41.4773	55.1285
ARR-B	Lsat_1_v5_gn_1_14320	35.6747	21.5843	11.447	10.59
ARR-B	Lsat_1_v5_gn_2_110060	52.8455	45.3873	39.687	35.4609
ARR-B	Lsat_1_v5_gn_2_115441	14.9613	82.224	56.9767	55.7384
ARR-B	Lsat_1_v5_gn_5_21481	18.5241	4.11753	1.59844	1.41542
ARR-B	Lsat_1_v5_gn_8_21260	18.4574	40.0079	33.7894	32.6808
ARR-B	Lsat_1_v5_gn_8_4341	1.12194	14.6968	14.8727	8.95768
FAR1	Lactuca_sativa_newGene_1692	17.2729	10.7726	12.0232	9.30262
FAR1	Lactuca_sativa_newGene_1707	6.25616	2.39834	3.15892	2.35177
FAR1	Lactuca_sativa_newGene_1748	5.23794	2.7242	2.50971	2.29432
FAR1	Lactuca_sativa_newGene_2034	11.7348	9.23849	8.83103	6.99753
FAR1	Lactuca_sativa_newGene_2640	2.16952	1.23428	1.16792	0.941872
FAR1	Lactuca_sativa_newGene_3054	0	0.765089	1.67165	0.871331
FAR1	Lactuca_sativa_newGene_4177	6.91057	6.70743	7.22479	6.00395
FAR1	Lactuca_sativa_newGene_4906	6.67918	5.55967	4.17409	4.41786
FAR1	Lactuca_sativa_newGene_5002	7.70521	6.03178	8.36479	5.77539
FAR1	Lsat_1_v5_gn_1_77520	3.96923	2.78948	2.75606	2.0437
FAR1	Lsat_1_v5_gn_2_30280	0	0	0	0.0764237
FAR1	Lsat_1_v5_gn_3_136761	0	0	0	0
FAR1	Lsat_1_v5_gn_4_9780	15.3852	9.59741	11.5051	8.78879
FAR1	Lsat_1_v5_gn_7_97020	3.68495	2.21632	2.08215	1.65516
FAR1	Lsat_1_v5_gn_8_33061	10.9541	6.82518	7.29182	6.82965
HB-WOX	Lactuca_sativa_newGene_6195	0.20846	0	0.0456573	0
HB-WOX	Lsat_1_v5_gn_2_121620	0.423733	0.136587	0.487369	0.617317
HB-WOX	Lsat_1_v5_gn_3_67961	61.288	47.1659	54.4479	36.8634
HB-WOX	Lsat_1_v5_gn_3_74320	0.013866	0	0	0
HB-WOX	Lsat_1_v5_gn_4_127120	38.9806	21.639	32.1044	16.5696
HB-WOX	Lsat_1_v5_gn_4_51320	0	0	0	0.0921523
HB-WOX	Lsat_1_v5_gn_5_165801	0	0.077338	0	0
HB-WOX	Lsat_1_v5_gn_5_166341	8.1449	9.99345	7.11885	5.53041
HB-WOX	Lsat_1_v5_gn_5_166840	0.0162147	0	0	0
HB-WOX	Lsat_1_v5_gn_5_167661	0.175273	0	0	0
HB-WOX	Lsat_1_v5_gn_5_66700	0	0	0	0
HB-WOX	Lsat_1_v5_gn_5_72381	0.336482	0.109941	0.0652583	0.092241
HB-WOX	Lsat_1_v5_gn_8_109341	0	0	0	0
HB-WOX	Lsat_1_v5_gn_8_78041	0	0	0	0
HB-WOX	Lsat_1_v5_gn_9_21960	0	0	0	0
zf-HD	Lsat_1_v5_gn_1_12721	0.130789	0.177644	0.072755	0
zf-HD	Lsat_1_v5_gn_2_87520	0	0	0	0
zf-HD	Lsat_1_v5_gn_2_88261	0	0	0	0
zf-HD	Lsat_1_v5_gn_2_89240	3.49845	5.05433	43.6237	33.2073
zf-HD	Lsat_1_v5_gn_3_100380	0.051225	0.026016	0	0
zf-HD	Lsat_1_v5_gn_3_101681	20.5442	26.9222	30.1977	22.7842
zf-HD	Lsat_1_v5_gn_3_52520	13.3733	19.5687	19.8355	33.6987
zf-HD	Lsat_1_v5_gn_3_76721	3.48129	3.84847	2.21957	0.917667
zf-HD	Lsat_1_v5_gn_4_107981	31.1359	6.93805	23.2117	14.5378
zf-HD	Lsat_1_v5_gn_4_118420	3.21241	0.52037	0.161812	0
zf-HD	Lsat_1_v5_gn_4_152340	1.10316	0.829628	1.35101	0.803536
zf-HD	Lsat_1_v5_gn_4_178260	6.76926	3.72415	1.66575	1.41613
zf-HD	Lsat_1_v5_gn_5_27621	22.0199	20.9702	27.092	18.4352
zf-HD	Lsat_1_v5_gn_6_105160	8.14293	8.282	7.61501	7.40979
zf-HD	Lsat_1_v5_gn_8_52401	7.65189	2.55952	6.7938	3.32082
zf-HD	Lsat_1_v5_gn_9_124981	1.6859	0.21815	0.09677	0.0208203
zf-HD	Lsat_1_v5_gn_9_74161	0	0	0	0
zf-HD	Lsat_1_v5_gn_9_83421	0.226947	0.143582	0.007746	0
NF-YB	Lactuca_sativa_newGene_2921	3.01732	1.90526	1.55208	0.955285
NF-YB	Lsat_1_v5_gn_1_15700	21.2597	10.7451	12.2339	8.93725
NF-YB	Lsat_1_v5_gn_1_53800	0.540785	0.115408	0.160768	0
NF-YB	Lsat_1_v5_gn_1_82020	0	0	0	0
NF-YB	Lsat_1_v5_gn_2_109681	7.80619	11.4897	4.52564	5.33677
NF-YB	Lsat_1_v5_gn_2_115161	40.129	29.1099	24.2333	21.0512
NF-YB	Lsat_1_v5_gn_2_37460	0	0	0	0.0112757
NF-YB	Lsat_1_v5_gn_2_59441	18.4173	12.3002	11.0612	8.92525
NF-YB	Lsat_1_v5_gn_2_65440	0	0	0	0
NF-YB	Lsat_1_v5_gn_4_111820	13.6695	9.46372	12.0995	8.96235
NF-YB	Lsat_1_v5_gn_4_63880	0	0	0.0137343	0.043187
NF-YB	Lsat_1_v5_gn_5_1080	6.64372	5.06396	5.47906	2.21611
NF-YB	Lsat_1_v5_gn_5_122040	25.6467	29.2409	14.7604	10.4646
NF-YB	Lsat_1_v5_gn_6_16641	0	0	0	0
NF-YB	Lsat_1_v5_gn_6_29620	3.93406	2.61238	1.83611	1.54037
NF-YB	Lsat_1_v5_gn_7_13001	0	0.0195963	0	0.0351423
NF-YB	Lsat_1_v5_gn_9_123081	0.906578	0.209252	0.472254	0.644607
NF-YB	Lsat_1_v5_gn_9_2061	0	0	0	0
NF-YB	Lsat_1_v5_gn_9_67940	9.40052	7.80455	8.08487	7.3662
NF-YA	Lsat_1_v5_gn_1_117081	9.75333	7.49062	8.56916	7.35518
NF-YA	Lsat_1_v5_gn_1_37160	5.00403	0.395755	1.22516	0.891982
NF-YA	Lsat_1_v5_gn_2_54241	13.3267	29.2094	34.8694	38.9992
NF-YA	Lsat_1_v5_gn_2_97800	6.45759	7.58093	9.68664	9.64182
NF-YA	Lsat_1_v5_gn_4_31560	10.714	11.35	14.0196	15.8808
NF-YA	Lsat_1_v5_gn_6_34921	2.1071	1.6887	2.05183	1.90917
NF-YA	Lsat_1_v5_gn_6_47121	5.12784	6.24374	6.10575	6.51384
NF-YA	Lsat_1_v5_gn_7_34841	3.75553	3.65603	9.1687	7.1426
NF-YC	Lactuca_sativa_newGene_502	37.0792	32.5815	25.3073	23.3488
NF-YC	Lsat_1_v5_gn_1_65500	26.0272	33.4104	26.126	21.957
NF-YC	Lsat_1_v5_gn_2_64201	12.4444	20.8846	29.5957	30.4894
NF-YC	Lsat_1_v5_gn_3_117840	3.12156	1.98958	1.32268	1.44101
NF-YC	Lsat_1_v5_gn_4_29881	34.6185	29.0595	25.791	19.8886
NF-YC	Lsat_1_v5_gn_5_12561	14.85	6.93588	7.14797	5.12126
NF-YC	Lsat_1_v5_gn_5_74780	78.2142	67.2254	66.6737	60.8407
NF-YC	Lsat_1_v5_gn_6_87100	0	0	0	0
NF-YC	Lsat_1_v5_gn_8_131281	6.01873	4.01812	4.0463	1.83223
SBP	Lsat_1_v5_gn_1_128400	26.7642	55.545	27.1383	24.8227
SBP	Lsat_1_v5_gn_1_128420	0.591391	1.99734	1.51092	0.706201
SBP	Lsat_1_v5_gn_1_128440	1.47865	5.55904	3.5977	2.73061
SBP	Lsat_1_v5_gn_1_14540	1.37842	1.23226	1.16553	1.22689
SBP	Lsat_1_v5_gn_1_30300	0	0	0	0
SBP	Lsat_1_v5_gn_1_39821	37.601	23.4374	28.572	22.3784
SBP	Lsat_1_v5_gn_3_31000	5.48509	12.5122	20.9427	24.1977
SBP	Lsat_1_v5_gn_3_37960	0.102866	0	0	0
SBP	Lsat_1_v5_gn_4_113241	0.230139	0.957992	0.286152	1.84066
SBP	Lsat_1_v5_gn_4_1141	3.52304	0.381534	0.162264	0.051167
SBP	Lsat_1_v5_gn_4_184960	2.41197	0.781866	1.15586	0.944598
SBP	Lsat_1_v5_gn_4_421	19.842	17.8971	16.866	11.1949
SBP	Lsat_1_v5_gn_4_44160	14.5705	7.27809	5.76754	3.21761
SBP	Lsat_1_v5_gn_4_52201	9.35441	11.3704	20.6434	12.4017
SBP	Lsat_1_v5_gn_4_81541	5.24202	5.00949	3.32588	1.26797
SBP	Lsat_1_v5_gn_5_12360	11.4096	5.87428	3.96884	3.32791
SBP	Lsat_1_v5_gn_5_173240	0	0.111564	0.019609	0
SBP	Lsat_1_v5_gn_5_81161	0	0	0	0
SBP	Lsat_1_v5_gn_6_117840	40.7113	36.811	41.5875	37.974
SBP	Lsat_1_v5_gn_6_14240	10.8973	9.06861	9.6395	7.74405
SBP	Lsat_1_v5_gn_7_11040	2.13016	2.97451	2.34429	2.11116
SBP	Lsat_1_v5_gn_7_11081	4.63098	0.912656	0.481097	1.23925
SBP	Lsat_1_v5_gn_8_134640	1.9193	0.874418	0.875842	0.82929
SBP	Lsat_1_v5_gn_8_70141	0.086121	0.0114083	0	0.019579
SBP	Lsat_1_v5_gn_9_23041	7.83767	15.1851	16.9122	19.4613
SBP	Lsat_1_v5_gn_9_28021	5.17918	10.2763	6.99505	4.0044
SBP	Lsat_1_v5_gn_9_48121	33.9353	29.443	31.8978	30.5788
HSF	Lactuca_sativa_newGene_2899	0.0116067	0.352814	0.938538	1.19619
HSF	Lactuca_sativa_newGene_4823	3.73239	0.373589	0.385598	0.40888
HSF	Lsat_1_v5_gn_0_11820	0	0.0124577	0	0.006894
HSF	Lsat_1_v5_gn_1_126880	0.0187677	0.162861	0.0661133	0.139352
HSF	Lsat_1_v5_gn_1_21321	13.9869	5.47785	7.14273	4.0974
HSF	Lsat_1_v5_gn_1_50141	3.13322	5.6459	6.51277	6.24439
HSF	Lsat_1_v5_gn_1_70440	24.4132	17.4291	17.4219	16.458
HSF	Lsat_1_v5_gn_2_133880	24.5427	32.778	27.437	28.19
HSF	Lsat_1_v5_gn_3_19100	21.38	18.1984	21.2108	13.6889
HSF	Lsat_1_v5_gn_3_8400	1.63235	5.6545	3.79726	5.88126
HSF	Lsat_1_v5_gn_3_90920	7.22387	9.96912	11.5145	26.8062
HSF	Lsat_1_v5_gn_4_126681	8.81412	4.95947	4.80595	2.00756
HSF	Lsat_1_v5_gn_4_165921	32.3711	72.7993	74.2478	87.4114
HSF	Lsat_1_v5_gn_4_26761	17.4982	27.5623	35.8732	53.0356
HSF	Lsat_1_v5_gn_4_48361	3.13723	1.60412	1.28008	1.27836
HSF	Lsat_1_v5_gn_4_52841	19.0309	15.0473	19.1014	10.1823
HSF	Lsat_1_v5_gn_4_81660	0	0	0	0
HSF	Lsat_1_v5_gn_5_103200	4.73265	9.85604	7.78994	6.88739
HSF	Lsat_1_v5_gn_5_142940	1.85745	0.40459	0.265941	0.167613
HSF	Lsat_1_v5_gn_5_172781	0	0.0114903	0	0
HSF	Lsat_1_v5_gn_5_185701	1.3247	6.25402	7.17761	3.81843
HSF	Lsat_1_v5_gn_5_48320	3.74027	26.0532	15.8184	8.09685
HSF	Lsat_1_v5_gn_6_1620	0	0	0	0
HSF	Lsat_1_v5_gn_6_77581	0	0	0	0
HSF	Lsat_1_v5_gn_7_19541	0.033675	0	0.079462	0
HSF	Lsat_1_v5_gn_7_19561	0	0	0	0
HSF	Lsat_1_v5_gn_7_25320	4.00481	6.6698	2.58029	5.03188
HSF	Lsat_1_v5_gn_7_40921	1.72537	4.8413	2.47588	2.30162
HSF	Lsat_1_v5_gn_8_35220	12.5269	11.5511	9.3245	10.8015
HSF	Lsat_1_v5_gn_8_55640	2.43529	1.25659	1.33354	0.323288
HSF	Lsat_1_v5_gn_8_6800	1.78339	6.62503	6.28276	8.20925
HSF	Lsat_1_v5_gn_9_30661	0.826654	0.03939	0.0400393	0.0239953
HSF	Lsat_1_v5_gn_9_7580	1.18549	1.86085	1.27848	1.20319
C2C2-GATA	Lactuca_sativa_newGene_2950	37.8926	31.6273	31.3873	23.2657
C2C2-GATA	Lactuca_sativa_newGene_983	16.805	23.5113	19.1344	32.0122
C2C2-GATA	Lsat_1_v5_gn_1_34581	16.7398	13.5592	18.9224	15.3481
C2C2-GATA	Lsat_1_v5_gn_1_46020	0.0265607	0.010664	0	0
C2C2-GATA	Lsat_1_v5_gn_1_64100	16.4532	17.9148	15.7095	7.1344
C2C2-GATA	Lsat_1_v5_gn_2_100261	30.5347	20.3762	24.1947	13.5143
C2C2-GATA	Lsat_1_v5_gn_2_42120	20.4417	20.9647	14.8944	20.1205
C2C2-GATA	Lsat_1_v5_gn_2_57840	19.1923	15.9013	9.25626	8.95578
C2C2-GATA	Lsat_1_v5_gn_2_76320	1.77066	0.468375	0.568961	0.370575
C2C2-GATA	Lsat_1_v5_gn_2_78320	15.4768	3.41817	7.90922	4.84863
C2C2-GATA	Lsat_1_v5_gn_3_128781	38.0428	26.9549	44.4028	22.7726
C2C2-GATA	Lsat_1_v5_gn_3_44100	17.8731	14.9432	10.0398	10.6753
C2C2-GATA	Lsat_1_v5_gn_3_75520	20.84	7.06126	9.98549	2.69556
C2C2-GATA	Lsat_1_v5_gn_3_76460	0.690929	0.210705	0.028306	0
C2C2-GATA	Lsat_1_v5_gn_4_148820	2.11353	0.164981	0.19209	0.0312707
C2C2-GATA	Lsat_1_v5_gn_4_67040	6.89304	2.97541	2.67895	1.81067
C2C2-GATA	Lsat_1_v5_gn_4_88520	16.0869	12.4761	15.4765	11.6504
C2C2-GATA	Lsat_1_v5_gn_5_110200	21.8965	16.7611	22.6579	16.0054
C2C2-GATA	Lsat_1_v5_gn_5_145340	0.29957	0.0636293	0.026605	0
C2C2-GATA	Lsat_1_v5_gn_5_33721	0.688802	0.50421	0.500276	0.121754
C2C2-GATA	Lsat_1_v5_gn_6_115200	10.4232	6.02685	2.96512	2.2044
C2C2-GATA	Lsat_1_v5_gn_6_19400	9.65389	6.67889	2.50363	2.04557
C2C2-GATA	Lsat_1_v5_gn_6_62960	0.740191	0.664777	0.437031	0.512241
C2C2-GATA	Lsat_1_v5_gn_6_95060	13.2443	13.1502	13.873	14.7484
C2C2-GATA	Lsat_1_v5_gn_7_10301	1.00976	1.01676	0.309402	0.261887
C2C2-GATA	Lsat_1_v5_gn_7_37240	0.391957	0.0683987	0	0
C2C2-GATA	Lsat_1_v5_gn_7_73740	2.07393	0.62107	0.168523	0.224989
C2C2-GATA	Lsat_1_v5_gn_7_77900	0	0	0	0
C2C2-GATA	Lsat_1_v5_gn_7_77920	0	0	0	0
C2C2-GATA	Lsat_1_v5_gn_7_83621	32.6346	24.3673	25.2085	21.1733
C2C2-GATA	Lsat_1_v5_gn_8_166400	4.85655	3.51019	1.72985	1.11498
C2C2-GATA	Lsat_1_v5_gn_8_20201	14.4773	13.5259	13.9172	12.8543
C2C2-GATA	Lsat_1_v5_gn_9_68900	29.7601	62.0203	40.3907	75.0625
C2C2-GATA	Lsat_1_v5_gn_9_79080	8.87986	8.81509	8.39686	5.75152
Trihelix	Lsat_1_v5_gn_0_10880	11.6236	10.5497	8.97042	6.7013
Trihelix	Lsat_1_v5_gn_0_16941	10.4637	15.5236	22.0502	9.36364
Trihelix	Lsat_1_v5_gn_1_50241	0.988526	0.66676	1.00766	0.769309
Trihelix	Lsat_1_v5_gn_1_50681	9.5087	11.0375	9.16344	7.605
Trihelix	Lsat_1_v5_gn_1_50761	5.5398	10.4936	18.5013	3.84046
Trihelix	Lsat_1_v5_gn_1_6081	35.7789	45.091	36.6352	35.6043
Trihelix	Lsat_1_v5_gn_1_6421	22.6743	23.1503	19.7101	13.7761
Trihelix	Lsat_1_v5_gn_1_66180	11.6255	11.978	11.2283	8.77734
Trihelix	Lsat_1_v5_gn_1_81241	10.4625	10.61	7.9608	7.67688
Trihelix	Lsat_1_v5_gn_1_84200	23.1053	12.0553	13.2014	8.70994
Trihelix	Lsat_1_v5_gn_1_84280	15.8603	5.30397	6.35554	4.0418
Trihelix	Lsat_1_v5_gn_3_137960	39.371	34.2161	21.7707	14.1923
Trihelix	Lsat_1_v5_gn_3_15221	24.2544	11.5979	18.9077	10.7988
Trihelix	Lsat_1_v5_gn_3_15241	34.9469	26.8731	26.5236	31.2026
Trihelix	Lsat_1_v5_gn_3_29420	38.953	24.2058	21.5906	16.0756
Trihelix	Lsat_1_v5_gn_4_103741	11.2931	9.05737	5.84041	4.28517
Trihelix	Lsat_1_v5_gn_4_1480	13.9165	6.18876	9.70821	8.34305
Trihelix	Lsat_1_v5_gn_4_185701	24.7335	20.0693	16.8837	13.1802
Trihelix	Lsat_1_v5_gn_4_40001	14.0536	6.22744	8.87532	6.80604
Trihelix	Lsat_1_v5_gn_4_63860	14.0631	6.19932	5.90226	3.97189
Trihelix	Lsat_1_v5_gn_5_10240	0.0750737	0.811099	0.361537	0.193731
Trihelix	Lsat_1_v5_gn_5_149380	0	0.058355	0.131025	0.343256
Trihelix	Lsat_1_v5_gn_5_157100	16.2317	21.9514	16.8707	21.912
Trihelix	Lsat_1_v5_gn_5_61301	11.3136	13.0407	10.9218	11.1273
Trihelix	Lsat_1_v5_gn_6_26780	10.5082	10.1848	9.28762	7.17464
Trihelix	Lsat_1_v5_gn_6_70821	18.6706	14.4536	20.5212	7.96346
Trihelix	Lsat_1_v5_gn_6_94181	19.1556	22.1384	22.148	27.049
Trihelix	Lsat_1_v5_gn_6_99141	29.2993	34.2059	25.11	17.9159
Trihelix	Lsat_1_v5_gn_7_31640	77.6016	47.7436	59.4552	51.7804
Trihelix	Lsat_1_v5_gn_7_42220	17.5856	17.7481	11.6476	10.3666
Trihelix	Lsat_1_v5_gn_8_101700	0.111589	0.170783	0.248363	2.68702
Trihelix	Lsat_1_v5_gn_8_140740	19.0513	17.3322	16.0874	12.4537
Trihelix	Lsat_1_v5_gn_8_89861	12.9587	5.2062	7.93092	5.98088
Trihelix	Lsat_1_v5_gn_9_116661	0	0	0	0
Trihelix	Lsat_1_v5_gn_9_35421	1.46646	18.2481	12.2721	18.1421
Trihelix	Lsat_1_v5_gn_9_41280	32.8537	17.3996	13.7466	12.1976
Trihelix	Lsat_1_v5_gn_9_61041	17.3547	10.279	10.6805	8.94286
C2C2-Dof	Lactuca_sativa_newGene_3533	13.9356	7.2654	8.36881	4.57822
C2C2-Dof	Lsat_1_v5_gn_1_125881	0.475559	0.545744	0.373039	0.176576
C2C2-Dof	Lsat_1_v5_gn_1_14020	0.46479	0.597752	0.664595	0.623667
C2C2-Dof	Lsat_1_v5_gn_1_15100	2.22719	3.01716	1.25335	0.644586
C2C2-Dof	Lsat_1_v5_gn_1_27080	0.244367	28.585	17.2604	57.2066
C2C2-Dof	Lsat_1_v5_gn_1_36380	7.86981	6.38123	8.21735	5.26575
C2C2-Dof	Lsat_1_v5_gn_1_8860	0	0	0	0
C2C2-Dof	Lsat_1_v5_gn_2_25421	8.92791	4.23861	5.02124	3.0731
C2C2-Dof	Lsat_1_v5_gn_2_54001	0	0	0	0
C2C2-Dof	Lsat_1_v5_gn_2_69680	0.206584	0.610722	3.03116	1.07973
C2C2-Dof	Lsat_1_v5_gn_2_86901	6.66846	2.01149	2.55156	1.79235
C2C2-Dof	Lsat_1_v5_gn_2_88380	9.21521	5.90014	10.2636	7.05687
C2C2-Dof	Lsat_1_v5_gn_3_12101	17.1214	4.26859	3.86745	2.42779
C2C2-Dof	Lsat_1_v5_gn_3_140380	1.01185	0.364344	0.881865	1.81192
C2C2-Dof	Lsat_1_v5_gn_3_63100	0	0.0106733	0	0.00836767
C2C2-Dof	Lsat_1_v5_gn_3_92320	0.671792	0.455973	0.775171	1.04741
C2C2-Dof	Lsat_1_v5_gn_4_108141	2.18685	3.86688	14.251	5.72743
C2C2-Dof	Lsat_1_v5_gn_4_155100	0.695221	12.7241	12.9111	13.9722
C2C2-Dof	Lsat_1_v5_gn_4_177381	23.7833	7.56564	11.2268	4.58338
C2C2-Dof	Lsat_1_v5_gn_4_179381	28.4304	11.5802	8.41561	8.46269
C2C2-Dof	Lsat_1_v5_gn_4_49661	8.86697	1.22699	0.422243	0.845736
C2C2-Dof	Lsat_1_v5_gn_4_52220	0	0.063145	0.0186247	0.121367
C2C2-Dof	Lsat_1_v5_gn_4_54501	2.52924	6.87676	15.7507	8.85159
C2C2-Dof	Lsat_1_v5_gn_4_95900	6.24981	21.4827	8.78674	13.6034
C2C2-Dof	Lsat_1_v5_gn_5_133940	3.52031	4.60321	3.1016	2.16261
C2C2-Dof	Lsat_1_v5_gn_5_14640	4.27431	2.00955	1.73897	1.2689
C2C2-Dof	Lsat_1_v5_gn_5_167880	16.2117	5.07499	4.29931	3.55023
C2C2-Dof	Lsat_1_v5_gn_5_19880	5.3127	1.37973	0.914643	1.04759
C2C2-Dof	Lsat_1_v5_gn_5_23801	30.0389	30.9092	33.7044	27.5145
C2C2-Dof	Lsat_1_v5_gn_6_24021	16.9493	7.08655	6.7795	9.32942
C2C2-Dof	Lsat_1_v5_gn_6_82461	17.9901	6.83811	12.3255	7.21275
C2C2-Dof	Lsat_1_v5_gn_7_19320	7.66238	3.55726	7.8652	6.23724
C2C2-Dof	Lsat_1_v5_gn_7_800	4.02546	1.43658	0.821454	2.11272
C2C2-Dof	Lsat_1_v5_gn_8_15720	4.80963	1.08231	0.459078	0.611089
C2C2-Dof	Lsat_1_v5_gn_8_51160	0.410332	0.117521	0.62465	0.365266
C2C2-Dof	Lsat_1_v5_gn_8_5520	28.0816	7.52726	9.29163	7.16756
C2C2-Dof	Lsat_1_v5_gn_8_75820	6.09055	2.50294	2.06634	1.97626
C2C2-Dof	Lsat_1_v5_gn_9_23080	9.39186	6.50398	5.51559	8.83775
TCP	Lactuca_sativa_newGene_4859	2.20945	0.0838527	0.0511107	0.022372
TCP	Lsat_1_v5_gn_1_115940	0	0	0	0
TCP	Lsat_1_v5_gn_1_115960	0	0	0	0
TCP	Lsat_1_v5_gn_1_120721	2.69796	0.613926	0.171011	0.298815
TCP	Lsat_1_v5_gn_1_13200	15.7223	13.1191	10.9309	11.5012
TCP	Lsat_1_v5_gn_1_16061	1.42499	0.143469	0.057899	0.0122853
TCP	Lsat_1_v5_gn_1_23301	0	0	0	0
TCP	Lsat_1_v5_gn_1_4641	0	0	0	0
TCP	Lsat_1_v5_gn_1_52001	0	0.0167637	0	0
TCP	Lsat_1_v5_gn_2_130241	4.00411	0.599737	2.15766	2.27724
TCP	Lsat_1_v5_gn_2_94320	13.467	6.60968	13.7962	10.833
TCP	Lsat_1_v5_gn_2_99740	0	0	0	0
TCP	Lsat_1_v5_gn_3_36601	61.8201	38.4517	35.6793	23.2269
TCP	Lsat_1_v5_gn_3_52660	2.29708	3.78791	2.8648	2.21925
TCP	Lsat_1_v5_gn_3_73860	0	0	0	0
TCP	Lsat_1_v5_gn_3_94461	0.132361	0.0277307	0.016237	0.0610123
TCP	Lsat_1_v5_gn_3_97300	0.105241	0.0203037	0.003906	0.0549003
TCP	Lsat_1_v5_gn_4_107781	14.8484	12.7435	8.00564	6.57817
TCP	Lsat_1_v5_gn_4_110881	0.0590673	0.00899567	0	0
TCP	Lsat_1_v5_gn_4_112280	0.627494	0.181994	0.0356333	0.035898
TCP	Lsat_1_v5_gn_4_171960	0.781762	1.51841	1.68561	1.59502
TCP	Lsat_1_v5_gn_4_175901	0	0	0	0
TCP	Lsat_1_v5_gn_4_175961	0	0	0	0
TCP	Lsat_1_v5_gn_4_19160	0	0	0.019403	0.0200933
TCP	Lsat_1_v5_gn_4_29640	5.37689	4.35989	5.27214	3.1685
TCP	Lsat_1_v5_gn_4_64660	27.3899	26.303	27.0915	22.8526
TCP	Lsat_1_v5_gn_5_103680	58.3408	25.5289	51.9097	40.1353
TCP	Lsat_1_v5_gn_5_127080	0	0	0	0
TCP	Lsat_1_v5_gn_5_19421	12.7158	7.98741	2.13649	3.03931
TCP	Lsat_1_v5_gn_5_22620	0	0	0	0
TCP	Lsat_1_v5_gn_6_45361	1.00309	0.549494	0.22249	0.106263
TCP	Lsat_1_v5_gn_7_23540	0.911323	0.174661	0.16843	0.0608277
TCP	Lsat_1_v5_gn_7_27781	2.77919	1.37023	0.736926	0.426312
TCP	Lsat_1_v5_gn_7_6960	2.1264	0.486924	0.981029	0.512213
TCP	Lsat_1_v5_gn_8_122100	0	0.0188013	0	0
TCP	Lsat_1_v5_gn_8_37420	0.225133	0.000306667	0.165459	0.341441
TCP	Lsat_1_v5_gn_8_51760	3.67767	6.82903	5.1916	5.46383
TCP	Lsat_1_v5_gn_8_7700	0.222642	0.327307	0.179975	0.364073
TCP	Lsat_1_v5_gn_9_53821	1.87435	0.269371	0.123844	0.0527687
TCP	Lsat_1_v5_gn_9_99020	2.11626	0.389508	0.254499	0.208133
HB-HD-ZIP	Lactuca_sativa_newGene_7159	9.59776	2.98771	12.7316	12.5252
HB-HD-ZIP	Lsat_1_v5_gn_1_10781	56.3069	70.3151	108.611	108.222
HB-HD-ZIP	Lsat_1_v5_gn_1_121861	1.73416	0.56729	0.0576813	0.077373
HB-HD-ZIP	Lsat_1_v5_gn_1_37081	54.2617	38.9425	58.276	47.6505
HB-HD-ZIP	Lsat_1_v5_gn_2_100140	43.2755	22.9459	46.3885	31.6468
HB-HD-ZIP	Lsat_1_v5_gn_2_122381	0	0	0	0
HB-HD-ZIP	Lsat_1_v5_gn_2_131660	0	0	0	0
HB-HD-ZIP	Lsat_1_v5_gn_2_20160	0	0	0	0
HB-HD-ZIP	Lsat_1_v5_gn_2_21861	0.0188117	0	0	0
HB-HD-ZIP	Lsat_1_v5_gn_2_80441	33.1766	31.0829	47.9704	29.1037
HB-HD-ZIP	Lsat_1_v5_gn_3_100281	28.7076	71.3048	52.21	94.5363
HB-HD-ZIP	Lsat_1_v5_gn_3_130901	12.9892	12.3336	11.4763	10.6026
HB-HD-ZIP	Lsat_1_v5_gn_3_14441	15.7417	158.863	87.1287	112.069
HB-HD-ZIP	Lsat_1_v5_gn_3_19261	1.65957	0.788192	0.093938	0.162948
HB-HD-ZIP	Lsat_1_v5_gn_3_49741	29.772	24.8165	45.9472	29.3016
HB-HD-ZIP	Lsat_1_v5_gn_3_50980	248.932	150.634	261.507	162.031
HB-HD-ZIP	Lsat_1_v5_gn_3_84881	116.18	61.8872	69.5449	51.0266
HB-HD-ZIP	Lsat_1_v5_gn_4_100080	40.5597	34.1779	49.6738	39.2237
HB-HD-ZIP	Lsat_1_v5_gn_4_102880	16.7605	13.4313	14.5187	11.5886
HB-HD-ZIP	Lsat_1_v5_gn_4_106901	99.1187	81.1277	89.4536	59.2659
HB-HD-ZIP	Lsat_1_v5_gn_4_158640	55.1958	34.1716	44.5253	29.5747
HB-HD-ZIP	Lsat_1_v5_gn_4_177261	7.46378	2.49158	1.4776	0.893792
HB-HD-ZIP	Lsat_1_v5_gn_4_182120	98.3702	107.176	100.072	84.9941
HB-HD-ZIP	Lsat_1_v5_gn_4_36761	4.05793	5.54992	0.696022	0.715168
HB-HD-ZIP	Lsat_1_v5_gn_4_60501	2.44646	0.759145	0.046097	0.088932
HB-HD-ZIP	Lsat_1_v5_gn_5_134441	34.8371	25.6088	43.3909	36.7745
HB-HD-ZIP	Lsat_1_v5_gn_5_164460	3.92962	0.747853	1.08702	1.04815
HB-HD-ZIP	Lsat_1_v5_gn_5_32500	14.0918	9.28343	18.261	13.0861
HB-HD-ZIP	Lsat_1_v5_gn_5_44521	237.833	101.285	138.21	101.308
HB-HD-ZIP	Lsat_1_v5_gn_6_22720	11.8598	10.2291	13.9742	9.72988
HB-HD-ZIP	Lsat_1_v5_gn_6_26681	0.030552	0	0	0
HB-HD-ZIP	Lsat_1_v5_gn_6_45641	33.2233	22.7211	34.9904	30.7301
HB-HD-ZIP	Lsat_1_v5_gn_6_93540	57.7805	51.3039	54.4577	27.979
HB-HD-ZIP	Lsat_1_v5_gn_7_17160	0.387202	0.215333	0.0934503	0.0821007
HB-HD-ZIP	Lsat_1_v5_gn_7_36341	0.13224	0.138527	1.07734	0.193916
HB-HD-ZIP	Lsat_1_v5_gn_8_53901	16.9086	8.94641	9.50126	7.7406
HB-HD-ZIP	Lsat_1_v5_gn_8_7020	1.15341	1.83407	0.44546	0.236336
HB-HD-ZIP	Lsat_1_v5_gn_8_781	0.559666	0.0218023	0	0
HB-HD-ZIP	Lsat_1_v5_gn_9_26081	0.902077	0.79318	0.9761	0.309877
HB-HD-ZIP	Lsat_1_v5_gn_9_73120	57.3726	53.119	39.9768	28.2644
HB-HD-ZIP	Lsat_1_v5_gn_9_79500	0	0	0	0
MADS	Lsat_1_v5_gn_0_21801	0	0	0	0
MADS	Lsat_1_v5_gn_0_36361	0.0373643	0	0	0
MADS	Lsat_1_v5_gn_0_601	0.227496	0.217282	0.379782	0.907951
MADS	Lsat_1_v5_gn_1_102361	0	0	0	0
MADS	Lsat_1_v5_gn_1_6441	0.0351123	0.019609	0.13265	0.0216547
MADS	Lsat_1_v5_gn_1_6501	0	0	0	0
MADS	Lsat_1_v5_gn_1_65761	0.088403	0	0	0
MADS	Lsat_1_v5_gn_1_65780	0.573198	0.17361	0.0801643	0.031634
MADS	Lsat_1_v5_gn_1_65800	0	0	0	0
MADS	Lsat_1_v5_gn_1_65880	0.204358	0.367809	0.272832	0.0661643
MADS	Lsat_1_v5_gn_2_110301	0	0	0	0
MADS	Lsat_1_v5_gn_2_111821	0.0189613	0.241455	0.479309	0.249023
MADS	Lsat_1_v5_gn_2_111921	0.0338167	0	0	0.0146293
MADS	Lsat_1_v5_gn_2_112180	0.0981827	0.632087	0.167725	0.138025
MADS	Lsat_1_v5_gn_2_130741	0	0	0	0
MADS	Lsat_1_v5_gn_2_98180	0.0192877	0.010535	0	0
MADS	Lsat_1_v5_gn_3_120640	0	0	0	0
MADS	Lsat_1_v5_gn_3_36000	0.117395	0.0121673	0.009423	0.00171067
MADS	Lsat_1_v5_gn_3_36661	0.171411	0.194662	0.198947	0.05244
MADS	Lsat_1_v5_gn_3_36681	0.0193333	0	0	0
MADS	Lsat_1_v5_gn_3_42860	0	0	0	0
MADS	Lsat_1_v5_gn_3_43421	0	0	0	0
MADS	Lsat_1_v5_gn_4_103221	0	0	0	0
MADS	Lsat_1_v5_gn_4_14100	16.6729	20.9202	11.8946	5.82925
MADS	Lsat_1_v5_gn_4_821	0	0	0	0
MADS	Lsat_1_v5_gn_4_920	3.02921	2.74709	2.71545	2.04029
MADS	Lsat_1_v5_gn_5_103840	0	0	0.123672	0.0828087
MADS	Lsat_1_v5_gn_5_109681	0	0	0.0611777	0.0515893
MADS	Lsat_1_v5_gn_5_111061	0	0	0	0
MADS	Lsat_1_v5_gn_5_144220	0	0	0	0
MADS	Lsat_1_v5_gn_5_23501	3.03681	1.19304	4.95943	7.70901
MADS	Lsat_1_v5_gn_6_109820	0	0	0	0
MADS	Lsat_1_v5_gn_7_19860	0	0	0	0
MADS	Lsat_1_v5_gn_7_31860	0	0	0	0
MADS	Lsat_1_v5_gn_7_71620	0.0134117	0	0.0136313	0
MADS	Lsat_1_v5_gn_7_84161	0.149285	0.11657	0.0509483	0.0876697
MADS	Lsat_1_v5_gn_8_35560	0.0460033	0	0	0
MADS	Lsat_1_v5_gn_9_25680	0	0	0	0
MADS	Lsat_1_v5_gn_9_60601	0	0	0	0
MADS	Lsat_1_v5_gn_9_65841	0	0.0678573	0.0738367	0.0298927
MADS	Lsat_1_v5_gn_9_65900	0	0	0	0
MADS	Lsat_1_v5_gn_9_98120	0	0	0	0
MADS	Lactuca_sativa_newGene_404	0.879822	1.06213	2.18105	1.16399
MADS	Lsat_1_v5_gn_1_102340	0	0	0	0
MADS	Lsat_1_v5_gn_1_14501	0.0137877	0	0	0
MADS	Lsat_1_v5_gn_1_15321	4.31989	7.22256	2.7605	4.71437
MADS	Lsat_1_v5_gn_1_33040	0	0.0720093	0	0.0422407
MADS	Lsat_1_v5_gn_1_7760	17.5946	25.5409	30.2162	32.4373
MADS	Lsat_1_v5_gn_2_70640	18.878	15.1299	21.7453	14.5949
MADS	Lsat_1_v5_gn_2_89920	0.917717	0.4576	0.295789	0.369073
MADS	Lsat_1_v5_gn_2_90281	0	0	0.033624	0
MADS	Lsat_1_v5_gn_2_93321	157.155	34.5653	72.399	67.8899
MADS	Lsat_1_v5_gn_3_134681	0	0	0	0
MADS	Lsat_1_v5_gn_3_134900	0.854699	0.113816	0.200431	0.041562
MADS	Lsat_1_v5_gn_3_30640	0.0789953	0.440241	0.791401	0.661151
MADS	Lsat_1_v5_gn_3_62800	1.72988	2.79611	3.08711	3.24277
MADS	Lsat_1_v5_gn_3_75340	0	0	0	0
MADS	Lsat_1_v5_gn_3_81820	0	0	0	0
MADS	Lsat_1_v5_gn_3_97021	1.05579	6.76457	0.0938503	0.138371
MADS	Lsat_1_v5_gn_4_103241	0.073905	0.0195457	0.0203913	0
MADS	Lsat_1_v5_gn_4_10400	15.8771	12.7599	15.1214	8.73808
MADS	Lsat_1_v5_gn_4_1060	0.920042	1.24796	2.6432	1.02489
MADS	Lsat_1_v5_gn_4_108241	25.232	28.3996	25.6597	23.2284
MADS	Lsat_1_v5_gn_4_114440	20.0739	29.2687	42.3972	42.9052
MADS	Lsat_1_v5_gn_4_116540	0.254262	0	0.0256043	0
MADS	Lsat_1_v5_gn_4_134700	6.60238	2.81822	1.92785	1.59889
MADS	Lsat_1_v5_gn_4_13881	0.546603	0.719874	0.281777	0.305278
MADS	Lsat_1_v5_gn_4_173601	0.124645	0.467963	1.73763	2.55962
MADS	Lsat_1_v5_gn_4_173641	0.0402747	0.05924	0	0
MADS	Lsat_1_v5_gn_4_37340	0.019863	0.0653243	0.043651	0.143553
MADS	Lsat_1_v5_gn_4_47080	0	0.019939	0	0.0340127
MADS	Lsat_1_v5_gn_4_71361	4.42685	2.06291	3.30216	1.47298
MADS	Lsat_1_v5_gn_4_81480	0.264522	0.585436	1.93405	0.743051
MADS	Lsat_1_v5_gn_4_861	63.87	112.689	89.1497	106.302
MADS	Lsat_1_v5_gn_6_105061	71.603	41.2185	31.9597	32.0723
MADS	Lsat_1_v5_gn_6_107221	13.2221	9.18747	15.8543	13.4812
MADS	Lsat_1_v5_gn_6_110140	0	0	0	0
MADS	Lsat_1_v5_gn_6_110160	0	0	0	0
MADS	Lsat_1_v5_gn_6_111621	0	0	0	0
MADS	Lsat_1_v5_gn_7_27060	0	0	0.0220317	0
MADS	Lsat_1_v5_gn_7_6780	14.6782	6.38896	11.1898	8.1898
MADS	Lsat_1_v5_gn_8_7760	0	0.0821017	0	0.138167
MADS	Lsat_1_v5_gn_9_31261	0	0	0	0
MADS	Lsat_1_v5_gn_9_53801	4.09335	15.5689	14.5878	22.3656
MADS	Lsat_1_v5_gn_9_75300	105.063	71.2321	70.7399	55.7294
GARP-G2-like	Lactuca_sativa_newGene_1888	4.88493	0	0	0
GARP-G2-like	Lactuca_sativa_newGene_2440	17.8439	15.8464	15.0849	11.751
GARP-G2-like	Lsat_1_v5_gn_0_580	27.0097	29.8352	25.7715	35.46
GARP-G2-like	Lsat_1_v5_gn_1_61300	5.18787	2.13711	1.76468	1.4482
GARP-G2-like	Lsat_1_v5_gn_1_61320	1.72151	1.44097	0.92108	0.783954
GARP-G2-like	Lsat_1_v5_gn_1_72761	100.491	16.6941	31.4724	30.1651
GARP-G2-like	Lsat_1_v5_gn_2_12361	0.0513517	0.0700687	0.060561	0.0873813
GARP-G2-like	Lsat_1_v5_gn_2_123620	0.010561	0.093904	0.00876267	0
GARP-G2-like	Lsat_1_v5_gn_2_50080	0	0	0	0
GARP-G2-like	Lsat_1_v5_gn_2_91401	0	0	0	0
GARP-G2-like	Lsat_1_v5_gn_3_18021	15.0424	13.4033	6.77118	6.1317
GARP-G2-like	Lsat_1_v5_gn_3_20841	8.33036	7.6658	4.99937	3.04197
GARP-G2-like	Lsat_1_v5_gn_3_67301	8.87456	7.37226	3.34335	2.88093
GARP-G2-like	Lsat_1_v5_gn_4_123520	3.06262	3.00928	1.15014	0.407627
GARP-G2-like	Lsat_1_v5_gn_4_168621	0	0	0	0
GARP-G2-like	Lsat_1_v5_gn_4_19841	0	0	0	0
GARP-G2-like	Lsat_1_v5_gn_4_20080	47.1917	68.8548	53.6642	33.4981
GARP-G2-like	Lsat_1_v5_gn_4_21660	2.03525	1.1054	2.15791	0.678801
GARP-G2-like	Lsat_1_v5_gn_4_48940	0.593712	0.243367	0.312608	0.115754
GARP-G2-like	Lsat_1_v5_gn_4_65140	24.2083	15.295	19.9243	16.3474
GARP-G2-like	Lsat_1_v5_gn_4_65921	17.3354	10.7098	12.8655	10.4597
GARP-G2-like	Lsat_1_v5_gn_4_71461	5.57253	6.15147	4.85046	2.55907
GARP-G2-like	Lsat_1_v5_gn_4_9740	44.0321	27.648	22.637	21.5114
GARP-G2-like	Lsat_1_v5_gn_5_117761	22.0619	37.5702	30.9594	35.4091
GARP-G2-like	Lsat_1_v5_gn_5_150340	0	0	0	0.0159797
GARP-G2-like	Lsat_1_v5_gn_5_164281	7.67309	2.53339	1.90935	1.20051
GARP-G2-like	Lsat_1_v5_gn_5_169461	14.5493	9.74151	4.52934	7.86326
GARP-G2-like	Lsat_1_v5_gn_5_173201	0.49109	0.441279	0.043382	0.259268
GARP-G2-like	Lsat_1_v5_gn_5_183281	13.0597	7.99701	7.67195	6.0608
GARP-G2-like	Lsat_1_v5_gn_6_113721	4.48035	2.09359	1.66133	0.878027
GARP-G2-like	Lsat_1_v5_gn_6_3581	3.09487	3.14432	1.45344	1.46434
GARP-G2-like	Lsat_1_v5_gn_6_60361	19.5433	10.1662	8.89694	6.97267
GARP-G2-like	Lsat_1_v5_gn_6_66681	0	0	0	0
GARP-G2-like	Lsat_1_v5_gn_6_81281	0.79555	0.620667	0.26536	0.165325
GARP-G2-like	Lsat_1_v5_gn_7_106661	10.226	6.60726	3.82341	3.48191
GARP-G2-like	Lsat_1_v5_gn_7_12761	13.7982	11.6813	8.96949	12.1683
GARP-G2-like	Lsat_1_v5_gn_7_42681	4.73505	1.94744	1.89809	1.53941
GARP-G2-like	Lsat_1_v5_gn_7_69101	10.8794	7.42654	3.25781	2.91795
GARP-G2-like	Lsat_1_v5_gn_7_8300	0.12052	0.12243	0.0182347	0.0280403
GARP-G2-like	Lsat_1_v5_gn_7_87680	0.632303	0.828678	0.349722	2.59137
GARP-G2-like	Lsat_1_v5_gn_8_101920	0	0	0	0
GARP-G2-like	Lsat_1_v5_gn_8_110900	1.03989	0.167523	0.00945867	0.0180297
GARP-G2-like	Lsat_1_v5_gn_8_146800	0	0	0	0
GARP-G2-like	Lsat_1_v5_gn_8_33960	1.28293	0.312363	0.627932	0.388099
GARP-G2-like	Lsat_1_v5_gn_8_38620	8.64554	3.49621	1.95266	1.63385
GARP-G2-like	Lsat_1_v5_gn_8_42300	0	0	0	0.0323583
GARP-G2-like	Lsat_1_v5_gn_8_42340	0	0	0	0
GARP-G2-like	Lsat_1_v5_gn_8_72921	16.2793	12.1285	4.55474	7.1827
GARP-G2-like	Lsat_1_v5_gn_8_82860	22.2714	17.156	18.246	11.5506
GARP-G2-like	Lsat_1_v5_gn_9_108901	6.81243	9.20571	7.83778	5.91838
GARP-G2-like	Lsat_1_v5_gn_9_11321	16.4409	8.35109	9.97909	6.76908
GARP-G2-like	Lsat_1_v5_gn_9_24661	3.61317	0.614489	0.115933	0.0758273
GARP-G2-like	Lsat_1_v5_gn_9_34740	0	0	0	0
GARP-G2-like	Lsat_1_v5_gn_9_54521	0	0	0	0
GARP-G2-like	Lsat_1_v5_gn_9_60961	0.0811737	0.042311	0	0.0335733
C3H	Lactuca_sativa_newGene_5798	8.22782	4.00101	3.95714	2.20779
C3H	Lsat_1_v5_gn_0_17341	0	0	0	0
C3H	Lsat_1_v5_gn_1_106881	48.8483	22.519	33.9144	24.8599
C3H	Lsat_1_v5_gn_1_107981	38.1728	36.8237	36.1463	32.1678
C3H	Lsat_1_v5_gn_1_110800	14.4884	10.1177	8.68045	8.35614
C3H	Lsat_1_v5_gn_1_124320	4.75709	3.02077	2.85659	2.81056
C3H	Lsat_1_v5_gn_2_124621	75.4738	325.033	259.69	310.35
C3H	Lsat_1_v5_gn_2_17440	13.5755	9.28029	11.9056	11.6993
C3H	Lsat_1_v5_gn_2_78401	20.0318	16.6162	20.3039	19.4372
C3H	Lsat_1_v5_gn_2_80881	4.08554	3.19851	10.1999	5.87476
C3H	Lsat_1_v5_gn_2_97741	10.7606	6.45196	9.09583	8.70382
C3H	Lsat_1_v5_gn_3_24160	27.4781	82.7241	98.2463	122.084
C3H	Lsat_1_v5_gn_3_38741	0	0.076574	0.100354	0.685591
C3H	Lsat_1_v5_gn_3_43700	12.1656	7.80011	9.35234	6.95871
C3H	Lsat_1_v5_gn_4_105901	0.223459	0.186752	0.36139	0.053872
C3H	Lsat_1_v5_gn_4_135201	7.9017	6.02082	6.23942	5.29854
C3H	Lsat_1_v5_gn_4_172581	0	0	0	0
C3H	Lsat_1_v5_gn_4_184801	2.08098	1.94025	1.19895	0.782804
C3H	Lsat_1_v5_gn_4_26121	34.4805	29.987	30.1452	27.8173
C3H	Lsat_1_v5_gn_4_29061	13.4918	22.1322	34.1781	23.1818
C3H	Lsat_1_v5_gn_4_76400	43.4875	50.0098	38.4115	34.3164
C3H	Lsat_1_v5_gn_4_91360	3.21115	2.5307	2.98419	1.80157
C3H	Lsat_1_v5_gn_5_146141	14.5999	12.7952	11.4504	11.0563
C3H	Lsat_1_v5_gn_5_162440	13.0191	6.2666	8.92829	6.14647
C3H	Lsat_1_v5_gn_5_180321	0.495492	0	0	0
C3H	Lsat_1_v5_gn_5_184121	4.0004	0	0	0
C3H	Lsat_1_v5_gn_5_189400	37.3175	37.8835	36.0708	33.4195
C3H	Lsat_1_v5_gn_5_35081	0	0	0	0
C3H	Lsat_1_v5_gn_5_52221	30.8369	25.1988	39.1599	28.3985
C3H	Lsat_1_v5_gn_5_80700	19.7031	11.7192	11.1607	8.49739
C3H	Lsat_1_v5_gn_6_4040	5.60845	5.53456	6.44776	5.45286
C3H	Lsat_1_v5_gn_6_46101	0	0	0	0
C3H	Lsat_1_v5_gn_6_50740	19.0731	16.7626	14.1794	14.5117
C3H	Lsat_1_v5_gn_6_7601	26.3915	31.2669	54.295	24.5764
C3H	Lsat_1_v5_gn_6_78060	10.1083	14.5366	10.7449	9.87526
C3H	Lsat_1_v5_gn_6_96540	8.15679	5.27919	4.93404	3.89016
C3H	Lsat_1_v5_gn_7_111061	26.5529	19.8209	20.1811	17.0202
C3H	Lsat_1_v5_gn_7_1360	26.8887	25.1653	20.6435	26.4846
C3H	Lsat_1_v5_gn_7_29481	29.086	21.0844	20.5364	16.4201
C3H	Lsat_1_v5_gn_7_36681	5.15212	4.03837	3.37427	2.25711
C3H	Lsat_1_v5_gn_7_45801	4.65021	3.47814	4.24115	2.99766
C3H	Lsat_1_v5_gn_7_61541	0	0	0	0
C3H	Lsat_1_v5_gn_7_8200	5.64062	2.8723	4.04504	3.25418
C3H	Lsat_1_v5_gn_7_95260	17.0012	44.1169	48.3004	43.7449
C3H	Lsat_1_v5_gn_8_11721	56.2161	311.135	201.97	315.693
C3H	Lsat_1_v5_gn_8_126921	25.9006	25.8853	22.0727	22.228
C3H	Lsat_1_v5_gn_8_134720	0	0	0	0
C3H	Lsat_1_v5_gn_8_20961	47.5499	41.3185	33.2783	29.5048
C3H	Lsat_1_v5_gn_8_31441	8.55724	9.29993	10.6592	10.5287
C3H	Lsat_1_v5_gn_8_34141	15.3539	11.1917	9.38664	7.97258
C3H	Lsat_1_v5_gn_8_37740	0	0	0	0
C3H	Lsat_1_v5_gn_8_42221	1.29224	1.3171	3.40435	2.00159
C3H	Lsat_1_v5_gn_8_57420	0.281932	0.205293	0.317937	0.24793
C3H	Lsat_1_v5_gn_8_58860	0	0	0	0
C3H	Lsat_1_v5_gn_8_58880	0	0	0	0
C3H	Lsat_1_v5_gn_8_7660	23.1176	22.5826	19.511	19.2603
C3H	Lsat_1_v5_gn_8_87701	14.1157	14.7271	15.8928	12.3375
C3H	Lsat_1_v5_gn_8_88620	57.6966	109.968	69.3323	48.4874
C3H	Lsat_1_v5_gn_9_106160	21.5179	26.4823	36.3729	35.9224
C3H	Lsat_1_v5_gn_9_121820	10.9222	5.74161	5.55497	3.35251
C3H	Lsat_1_v5_gn_9_19740	6.22226	4.54075	3.21917	4.97839
C3H	Lsat_1_v5_gn_9_27341	11.6457	12.8512	14.117	11.3168
C3H	Lsat_1_v5_gn_9_48840	34.7526	48.9035	44.5008	37.4651
C3H	Lsat_1_v5_gn_9_61640	174.579	377.649	311.604	475.886
C3H	Lsat_1_v5_gn_9_66560	13.7844	9.31992	8.80123	5.90303
GRAS	Lsat_1_v5_gn_1_13041	0	0	0	0
GRAS	Lsat_1_v5_gn_1_13061	0	0	0	0
GRAS	Lsat_1_v5_gn_1_9720	27.8543	35.7987	27.3827	30.2931
GRAS	Lsat_1_v5_gn_1_97941	0.268312	0.558617	0.651526	0.376312
GRAS	Lsat_1_v5_gn_2_118380	13.4343	10.463	13.0219	10.5709
GRAS	Lsat_1_v5_gn_2_131100	11.3485	20.8593	19.0136	36.4291
GRAS	Lsat_1_v5_gn_2_28900	15.3995	17.8059	23.1923	23.0889
GRAS	Lsat_1_v5_gn_2_47641	0	0	0	0
GRAS	Lsat_1_v5_gn_2_59361	0	0	0	0
GRAS	Lsat_1_v5_gn_2_69481	117.479	78.0864	155.177	136.155
GRAS	Lsat_1_v5_gn_2_76860	6.82041	5.83854	6.20845	3.96268
GRAS	Lsat_1_v5_gn_2_82741	8.98394	9.38944	8.27821	5.49567
GRAS	Lsat_1_v5_gn_3_110621	4.49199	0.734976	0.641945	0.374657
GRAS	Lsat_1_v5_gn_3_128721	1.13251	0.822376	0.641314	1.31873
GRAS	Lsat_1_v5_gn_3_55521	1.95922	1.47793	0.937704	1.08811
GRAS	Lsat_1_v5_gn_3_681	3.66809	2.31172	4.33901	2.54166
GRAS	Lsat_1_v5_gn_3_78100	48.4473	29.0314	32.972	21.2665
GRAS	Lsat_1_v5_gn_3_78621	4.87247	3.74695	5.9807	3.48119
GRAS	Lsat_1_v5_gn_3_86920	40.2796	17.6986	12.743	7.09059
GRAS	Lsat_1_v5_gn_3_87941	1.77163	0.393647	0.745182	0.311489
GRAS	Lsat_1_v5_gn_4_10101	11.7575	13.4911	8.94994	8.28127
GRAS	Lsat_1_v5_gn_4_13640	52.9739	33.9328	43.7037	31.6248
GRAS	Lsat_1_v5_gn_4_153400	22.7281	14.7434	13.9667	8.71571
GRAS	Lsat_1_v5_gn_4_164800	0.149464	0.00893867	0	0
GRAS	Lsat_1_v5_gn_4_172961	0	0	0	0
GRAS	Lsat_1_v5_gn_4_185880	0.00586167	0	0	0.019238
GRAS	Lsat_1_v5_gn_4_63220	35.1926	67.2433	43.0428	77.4442
GRAS	Lsat_1_v5_gn_4_78740	0.066321	0.0505593	0.0779113	0.035179
GRAS	Lsat_1_v5_gn_4_92980	0.649307	0.119717	0.110038	0.0563607
GRAS	Lsat_1_v5_gn_5_118400	0.033099	0	0.00863733	0.0301973
GRAS	Lsat_1_v5_gn_5_118440	10.7177	5.8766	8.49291	6.97752
GRAS	Lsat_1_v5_gn_5_122860	3.83638	5.32459	7.35875	6.88426
GRAS	Lsat_1_v5_gn_5_13301	0.00921567	0.010717	0.00461033	0.007458
GRAS	Lsat_1_v5_gn_5_136120	0.39233	0.463583	0.342854	0.326596
GRAS	Lsat_1_v5_gn_5_153460	3.20254	1.00933	0.335269	0.465298
GRAS	Lsat_1_v5_gn_5_154481	3.04909	3.55635	3.45375	3.2078
GRAS	Lsat_1_v5_gn_5_169401	28.1746	41.8984	36.4991	79.6002
GRAS	Lsat_1_v5_gn_5_182821	0.134684	0.0554077	0.028664	0.0302287
GRAS	Lsat_1_v5_gn_5_341	0.0219843	0	0	0
GRAS	Lsat_1_v5_gn_5_8041	52.7539	148.711	94.0533	152.202
GRAS	Lsat_1_v5_gn_5_98761	9.98354	8.95515	7.11463	5.07462
GRAS	Lsat_1_v5_gn_6_16841	0	0	0	0
GRAS	Lsat_1_v5_gn_6_16901	0	0	0	0
GRAS	Lsat_1_v5_gn_6_16940	0.350926	0.347311	0.221999	0.323369
GRAS	Lsat_1_v5_gn_6_18160	0	0	0	0
GRAS	Lsat_1_v5_gn_6_18200	0	0	0	0
GRAS	Lsat_1_v5_gn_6_3180	71.2827	33.8804	52.1593	40.7147
GRAS	Lsat_1_v5_gn_6_7120	9.49177	4.39272	6.16212	4.75925
GRAS	Lsat_1_v5_gn_6_71221	2.35601	0.557146	0.40022	0.282958
GRAS	Lsat_1_v5_gn_6_7140	9.3346	3.5752	7.30908	4.29282
GRAS	Lsat_1_v5_gn_7_107680	2.08388	52.4603	31.9151	139.23
GRAS	Lsat_1_v5_gn_7_110740	0.113224	0.10606	0.131422	0.135479
GRAS	Lsat_1_v5_gn_7_113940	48.3747	45.0951	47.188	40.8336
GRAS	Lsat_1_v5_gn_7_63741	0	0	0.018268	0
GRAS	Lsat_1_v5_gn_7_9261	7.33125	3.33372	4.58882	3.3595
GRAS	Lsat_1_v5_gn_7_96181	13.0902	5.06817	9.00189	5.04547
GRAS	Lsat_1_v5_gn_8_102760	0.0128713	0.0289063	0.112138	0.0127597
GRAS	Lsat_1_v5_gn_8_1221	31.1149	26.2802	22.5883	18.9131
GRAS	Lsat_1_v5_gn_8_15220	7.42058	4.31641	6.41635	4.96741
GRAS	Lsat_1_v5_gn_8_44501	61.5448	0.26299	0.347949	0.329071
GRAS	Lsat_1_v5_gn_8_6721	13.3437	16.0995	10.2317	13.1865
GRAS	Lsat_1_v5_gn_8_73841	11.6789	28.2789	23.8132	20.9468
GRAS	Lsat_1_v5_gn_8_85281	4.31434	7.79045	10.0484	7.85347
GRAS	Lsat_1_v5_gn_9_23680	23.4153	35.6457	30.8205	32.3325
GRAS	Lsat_1_v5_gn_9_23720	0.0217123	0.0449027	0.012894	0
GRAS	Lsat_1_v5_gn_9_23760	0	0	0	0.06316
GRAS	Lsat_1_v5_gn_9_23820	16.7483	12.7455	6.38777	16.0401
GRAS	Lsat_1_v5_gn_9_37360	0.126754	0.274084	0.330769	0.155617
GRAS	Lsat_1_v5_gn_9_37380	0.187314	0.067033	0.155844	0.070748
GRAS	Lsat_1_v5_gn_9_37400	1.14402	0.355314	0.302733	0.203238
GRAS	Lsat_1_v5_gn_9_37420	0	0	0	0
GRAS	Lsat_1_v5_gn_9_88420	0.188412	0.097102	0.0429447	0.0257053
B3	Lactuca_sativa_newGene_2129	5.77038	2.07263	3.41316	1.9858
B3	Lactuca_sativa_newGene_2936	0	0.137354	0.0550673	0.233855
B3	Lactuca_sativa_newGene_361	0.6513	0.636982	0.607197	0.439539
B3	Lactuca_sativa_newGene_365	15.607	10.3755	7.86694	6.42533
B3	Lactuca_sativa_newGene_5809	2.3912	4.50362	2.63199	3.66359
B3	Lsat_1_v5_gn_0_34560	1.61484	0.750165	1.05504	0.656025
B3	Lsat_1_v5_gn_1_19200	18.077	11.2164	11.7919	8.4279
B3	Lsat_1_v5_gn_1_20940	1.1563	0.376097	0.817148	0.465775
B3	Lsat_1_v5_gn_1_43540	0	0	0	0
B3	Lsat_1_v5_gn_1_43600	3.01105	0.4212	0.253395	0.233546
B3	Lsat_1_v5_gn_1_43660	0	0	0	0
B3	Lsat_1_v5_gn_1_43960	0	0	0	0
B3	Lsat_1_v5_gn_2_56260	0.429912	0.932604	0.822709	1.00911
B3	Lsat_1_v5_gn_2_73861	0	0	0	0
B3	Lsat_1_v5_gn_2_87020	0.053261	0	0	0.0110637
B3	Lsat_1_v5_gn_2_87040	0	0.0590443	0	0.0252757
B3	Lsat_1_v5_gn_2_94561	0.785521	0.813838	0.533161	0.339788
B3	Lsat_1_v5_gn_3_109740	0.0665963	0.0507687	0.00857867	0.011291
B3	Lsat_1_v5_gn_3_15160	0.24819	0.303803	0.0271627	0.0272063
B3	Lsat_1_v5_gn_3_51441	18.999	21.7377	18.1596	17.5098
B3	Lsat_1_v5_gn_3_91001	13.2417	9.80802	8.36933	7.06385
B3	Lsat_1_v5_gn_3_94221	0	0	0	0
B3	Lsat_1_v5_gn_3_94261	0	0	0	0
B3	Lsat_1_v5_gn_3_94320	24.9094	19.1804	17.3685	14.0824
B3	Lsat_1_v5_gn_4_166040	8.98651	6.61571	5.95277	4.78737
B3	Lsat_1_v5_gn_4_166060	13.9067	9.86652	12.4193	7.69649
B3	Lsat_1_v5_gn_4_166080	23.0826	23.142	21.9311	14.719
B3	Lsat_1_v5_gn_4_177680	0.096644	0	0	0
B3	Lsat_1_v5_gn_4_78921	6.77199	4.82887	4.28508	3.12549
B3	Lsat_1_v5_gn_4_8941	2.74531	1.77134	1.30335	1.03955
B3	Lsat_1_v5_gn_4_9001	0.122238	0.109234	0.0777517	0.165749
B3	Lsat_1_v5_gn_4_9021	0	0	0	0.0181157
B3	Lsat_1_v5_gn_4_9181	0.019046	0	0	0
B3	Lsat_1_v5_gn_5_174940	12.4046	7.14517	8.30162	7.26433
B3	Lsat_1_v5_gn_5_32880	0.442946	0.0358533	0.139374	0.130167
B3	Lsat_1_v5_gn_5_59060	7.05304	3.03059	3.11074	2.63341
B3	Lsat_1_v5_gn_5_6840	7.27379	6.09193	5.2031	4.79139
B3	Lsat_1_v5_gn_6_102200	0	0	0	0
B3	Lsat_1_v5_gn_6_80741	0	0	0	0
B3	Lsat_1_v5_gn_7_19720	9.29377	7.79592	9.37461	7.62571
B3	Lsat_1_v5_gn_7_33120	3.06009	8.08304	4.67315	3.7432
B3	Lsat_1_v5_gn_7_87081	23.5251	14.08	16.4881	18.8764
B3	Lsat_1_v5_gn_7_87101	0.432225	0.103752	0.272024	0.198528
B3	Lsat_1_v5_gn_8_156801	0	0	0	0
B3	Lsat_1_v5_gn_8_43541	0	0	0	0
B3	Lsat_1_v5_gn_9_12860	0	0	0	0.0277153
B3	Lsat_1_v5_gn_9_12961	0	0.0361833	0	0
B3	Lsat_1_v5_gn_9_13380	2.9114	1.17369	1.63598	0.881654
B3	Lsat_1_v5_gn_9_13800	13.2957	22.3623	20.1487	34.7743
B3	Lsat_1_v5_gn_9_38980	16.4013	12.156	18.6659	20.7167
B3	Lsat_1_v5_gn_9_61080	0	0	0	0
B3	Lsat_1_v5_gn_1_32200	39.7788	28.2817	33.2429	34.8026
B3	Lsat_1_v5_gn_2_100181	12.8677	23.8099	38.0312	34.8626
B3	Lsat_1_v5_gn_2_112381	0.522885	0.362458	0.192605	0.139399
B3	Lsat_1_v5_gn_2_12381	13.8782	7.571	9.84094	7.61798
B3	Lsat_1_v5_gn_2_72540	102.265	124.241	136.653	133.703
B3	Lsat_1_v5_gn_2_98041	72.3214	57.633	56.9559	62.3086
B3	Lsat_1_v5_gn_3_11900	33.2885	24.3658	21.8807	12.1865
B3	Lsat_1_v5_gn_3_68721	71.4382	110.362	93.4947	98.6771
B3	Lsat_1_v5_gn_4_51680	18.6546	20.7992	27.1177	26.7714
B3	Lsat_1_v5_gn_5_139420	11.4598	12.6042	20.8122	16.8934
B3	Lsat_1_v5_gn_5_81601	42.7727	14.2845	11.8831	12.3869
B3	Lsat_1_v5_gn_5_9980	76.7075	64.0276	73.5037	79.6814
B3	Lsat_1_v5_gn_6_30741	15.0356	9.70468	15.2168	11.0342
B3	Lsat_1_v5_gn_6_84121	38.751	26.8539	20.0705	12.8087
B3	Lsat_1_v5_gn_6_9480	29.4607	22.7594	29.8908	26.211
B3	Lsat_1_v5_gn_7_22140	6.56419	4.824	4.37501	3.37123
B3	Lsat_1_v5_gn_7_27300	46.396	35.5753	40.6994	35.2448
B3	Lsat_1_v5_gn_7_57521	4.53254	0.766783	0.912881	0.740994
B3	Lsat_1_v5_gn_7_74681	32.8628	20.3204	24.2663	19.4212
B3	Lsat_1_v5_gn_8_20161	0.430099	2.40247	1.46728	3.3367
B3	Lsat_1_v5_gn_9_2121	5.33001	4.91118	5.04965	3.1089
B3	Lsat_1_v5_gn_9_46321	2.91714	1.4882	1.53261	1.59994
B3	Lsat_1_v5_gn_9_69060	5.1797	4.03269	5.93018	4.67471
WRKY	Lsat_1_v5_gn_0_15201	25.7912	21.1714	28.5894	19.4575
WRKY	Lsat_1_v5_gn_0_3061	2.88316	0.754331	0.257217	1.5873
WRKY	Lsat_1_v5_gn_1_22221	6.29599	6.92677	5.9155	10.934
WRKY	Lsat_1_v5_gn_1_80260	7.43152	0	0	0
WRKY	Lsat_1_v5_gn_1_82341	97.3735	52.0065	96.2978	79.9119
WRKY	Lsat_1_v5_gn_2_110080	1.46966	1.40482	0.661411	0.329575
WRKY	Lsat_1_v5_gn_2_126380	0.383019	0.412273	0.447281	0.531951
WRKY	Lsat_1_v5_gn_2_126880	33.0875	22.1824	6.66714	8.36054
WRKY	Lsat_1_v5_gn_2_126920	0.01615	0.812728	0.732523	0.259907
WRKY	Lsat_1_v5_gn_2_131480	0.145308	1.86522	0.260165	0.92553
WRKY	Lsat_1_v5_gn_3_11440	0.0105143	0.040197	0	0
WRKY	Lsat_1_v5_gn_3_139241	37.286	36.2086	38.6197	52.2833
WRKY	Lsat_1_v5_gn_3_25221	1.26887	1.01678	0.375056	0.212801
WRKY	Lsat_1_v5_gn_3_31320	10.7887	0.61034	0.644796	2.49383
WRKY	Lsat_1_v5_gn_3_51361	0.896004	0.110736	0	0.03689
WRKY	Lsat_1_v5_gn_3_8741	0.879613	5.01861	9.75765	38.8552
WRKY	Lsat_1_v5_gn_3_98441	85.5316	3.22013	1.07248	0.664047
WRKY	Lsat_1_v5_gn_4_10320	0.48281	0.147752	0.0536077	0.060216
WRKY	Lsat_1_v5_gn_4_1201	9.60558	4.3355	4.81875	7.85971
WRKY	Lsat_1_v5_gn_4_12300	9.80959	21.2899	27.7544	36.339
WRKY	Lsat_1_v5_gn_4_127960	13.188	40.0059	23.0617	60.8372
WRKY	Lsat_1_v5_gn_4_138020	11.0052	7.38731	9.02359	3.36168
WRKY	Lsat_1_v5_gn_4_164440	27.9227	22.9403	19.1227	25.7795
WRKY	Lsat_1_v5_gn_4_169921	32.9805	28.6914	25.8809	25.7052
WRKY	Lsat_1_v5_gn_4_35321	3.10577	5.28532	4.68488	9.09348
WRKY	Lsat_1_v5_gn_4_48480	4.40804	2.4903	2.55768	2.73121
WRKY	Lsat_1_v5_gn_4_61461	11.6473	25.8197	16.4418	35.4124
WRKY	Lsat_1_v5_gn_4_86881	40.6443	85.1573	74.4809	177.214
WRKY	Lsat_1_v5_gn_5_107761	0.136946	0.0174733	0	0
WRKY	Lsat_1_v5_gn_5_122901	24.593	20.3547	19.4232	16.2853
WRKY	Lsat_1_v5_gn_5_124140	0.0623633	0.906383	0.799205	0.780979
WRKY	Lsat_1_v5_gn_5_173860	0.806234	6.93843	7.71198	5.60558
WRKY	Lsat_1_v5_gn_5_18720	0.030238	0.006635	0.00628367	0.0342167
WRKY	Lsat_1_v5_gn_5_62060	5.70058	0.314019	0	0.0122937
WRKY	Lsat_1_v5_gn_5_84140	10.109	9.33038	7.911	9.9509
WRKY	Lsat_1_v5_gn_6_115920	2.48237	1.85458	1.71274	3.02023
WRKY	Lsat_1_v5_gn_6_12161	10.9553	160.605	92.0351	145.093
WRKY	Lsat_1_v5_gn_6_220	3.29353	8.58151	13.2571	36.795
WRKY	Lsat_1_v5_gn_6_84341	10.7399	85.277	52.3935	93.4726
WRKY	Lsat_1_v5_gn_7_111140	0.395159	0.0221593	0.0104833	0
WRKY	Lsat_1_v5_gn_7_113921	5.8116	4.41065	4.10776	3.70664
WRKY	Lsat_1_v5_gn_7_115881	26.2438	24.302	24.5104	21.4765
WRKY	Lsat_1_v5_gn_7_15520	3.40017	7.15587	2.46711	11.455
WRKY	Lsat_1_v5_gn_7_25760	2.09549	0.755398	1.96257	1.23717
WRKY	Lsat_1_v5_gn_7_29520	2.0683	0.856483	1.27105	0.829307
WRKY	Lsat_1_v5_gn_7_34280	3.22315	0.927282	0.696224	1.13097
WRKY	Lsat_1_v5_gn_7_4000	0.951344	3.50977	2.24119	3.3549
WRKY	Lsat_1_v5_gn_7_49760	32.9579	30.111	24.5536	21.8599
WRKY	Lsat_1_v5_gn_7_55280	12.4108	52.8061	28.7951	38.9701
WRKY	Lsat_1_v5_gn_7_60801	9.05129	3.35091	1.03638	1.76829
WRKY	Lsat_1_v5_gn_7_77361	6.34101	5.28526	6.43798	6.00656
WRKY	Lsat_1_v5_gn_7_92541	1.94716	3.96804	1.89187	2.1722
WRKY	Lsat_1_v5_gn_8_103681	27.7167	41.344	26.7519	56.8423
WRKY	Lsat_1_v5_gn_8_147781	11.6885	0.37973	0.705007	1.83036
WRKY	Lsat_1_v5_gn_8_166820	1.58422	4.44435	7.74096	8.06723
WRKY	Lsat_1_v5_gn_8_47440	11.0634	12.7362	9.98001	13.7621
WRKY	Lsat_1_v5_gn_8_48640	6.09579	5.63732	5.26765	4.2879
WRKY	Lsat_1_v5_gn_8_6060	0.557926	3.4281	4.93628	28.8635
WRKY	Lsat_1_v5_gn_8_63280	14.168	12.8001	14.0749	10.5485
WRKY	Lsat_1_v5_gn_8_6481	0.251987	4.35153	0.417522	0.919805
WRKY	Lsat_1_v5_gn_8_68740	8.13449	21.2696	16.8616	25.3895
WRKY	Lsat_1_v5_gn_8_91621	20.4573	18.9173	27.8511	26.6441
WRKY	Lsat_1_v5_gn_9_104500	32.4786	24.2028	25.0617	21.4042
WRKY	Lsat_1_v5_gn_9_106981	1.15148	2.55985	3.70917	2.57908
WRKY	Lsat_1_v5_gn_9_14580	15.2697	37.3115	31.7656	71.6285
WRKY	Lsat_1_v5_gn_9_2661	41.3456	13.7031	15.6051	6.65439
WRKY	Lsat_1_v5_gn_9_33061	0.0913817	0.208602	0	0
WRKY	Lsat_1_v5_gn_9_36381	0.118197	0.18322	0.108794	0.480671
WRKY	Lsat_1_v5_gn_9_38660	3.54743	3.35841	0.783044	0.482096
WRKY	Lsat_1_v5_gn_9_38680	1.7088	3.50831	1.83348	4.695
WRKY	Lsat_1_v5_gn_9_39381	2.31052	3.22004	3.61801	4.84778
WRKY	Lsat_1_v5_gn_9_39460	23.6235	7.41715	4.83384	4.70743
WRKY	Lsat_1_v5_gn_9_42560	0	0.134888	0	0
WRKY	Lsat_1_v5_gn_9_49041	0.275461	0.209225	0.389747	0.215155
WRKY	Lsat_1_v5_gn_9_60201	38.1926	41.5362	41.1021	34.0843
WRKY	Lsat_1_v5_gn_9_9681	20.4968	21.868	24.5873	21.2953
bZIP	Lactuca_sativa_newGene_1214	11.9417	9.52492	14.5949	14.6744
bZIP	Lsat_1_v5_gn_0_45360	0	0	0.00215033	0
bZIP	Lsat_1_v5_gn_1_100961	0	0	0	0
bZIP	Lsat_1_v5_gn_1_17120	116.875	122.269	137.672	101.523
bZIP	Lsat_1_v5_gn_1_21140	9.25863	13.3536	8.26468	9.16837
bZIP	Lsat_1_v5_gn_1_46700	0	0	0	0
bZIP	Lsat_1_v5_gn_1_4841	13.8192	3.95625	4.18948	2.89891
bZIP	Lsat_1_v5_gn_1_73701	0	0.0274297	0.0632817	0.073093
bZIP	Lsat_1_v5_gn_1_8440	38.0742	48.0855	44.5876	58.0671
bZIP	Lsat_1_v5_gn_1_89820	0	0	0	0
bZIP	Lsat_1_v5_gn_2_119841	15.8496	20.5953	32.2931	18.4829
bZIP	Lsat_1_v5_gn_2_126181	16.2384	15.9399	16.6043	10.2506
bZIP	Lsat_1_v5_gn_2_22561	4.13283	6.18658	5.11122	4.82036
bZIP	Lsat_1_v5_gn_2_31440	9.60345	7.85051	7.57864	6.17745
bZIP	Lsat_1_v5_gn_2_3181	60.4214	161.776	158.485	235.889
bZIP	Lsat_1_v5_gn_2_38660	4.82134	5.3238	5.29714	4.60027
bZIP	Lsat_1_v5_gn_2_7721	3.77418	1.97353	2.43376	2.44617
bZIP	Lsat_1_v5_gn_3_105781	0.15308	0.526095	0.302309	0.117208
bZIP	Lsat_1_v5_gn_3_139040	12.9583	21.484	20.0278	25.7602
bZIP	Lsat_1_v5_gn_3_20761	11.6435	12.4215	12.5804	7.70883
bZIP	Lsat_1_v5_gn_3_44620	3.12155	3.40251	3.43884	2.35623
bZIP	Lsat_1_v5_gn_3_46800	15.5026	10.7257	10.2914	6.88657
bZIP	Lsat_1_v5_gn_3_59901	1.49848	0.358988	0.404169	0.755259
bZIP	Lsat_1_v5_gn_3_77041	0.0771553	0.039269	0.124054	0.055943
bZIP	Lsat_1_v5_gn_3_78600	33.5115	22.8948	21.9812	19.4386
bZIP	Lsat_1_v5_gn_3_86301	2.26303	2.42638	6.81537	6.6943
bZIP	Lsat_1_v5_gn_3_95361	11.9568	0.390708	1.23445	1.40993
bZIP	Lsat_1_v5_gn_3_95540	2.4714	1.07233	3.16439	3.06408
bZIP	Lsat_1_v5_gn_4_117001	44.8466	32.3366	51.9415	39.7538
bZIP	Lsat_1_v5_gn_4_126380	6.1046	7.98331	5.58499	4.5932
bZIP	Lsat_1_v5_gn_4_136921	12.0123	5.94241	11.8673	5.66808
bZIP	Lsat_1_v5_gn_4_145080	2.80287	2.05374	3.53984	2.15514
bZIP	Lsat_1_v5_gn_4_153461	10.9428	5.62859	5.81491	5.49827
bZIP	Lsat_1_v5_gn_4_159740	0.0517483	0.0792097	0.316432	0.350969
bZIP	Lsat_1_v5_gn_4_177440	0	0	0	0
bZIP	Lsat_1_v5_gn_4_21421	11.8974	5.21072	9.91004	8.86744
bZIP	Lsat_1_v5_gn_4_30260	3.78571	1.67115	2.52108	0.652076
bZIP	Lsat_1_v5_gn_4_33560	10.5518	11.6154	10.2188	21.7508
bZIP	Lsat_1_v5_gn_5_120641	12.2824	18.346	36.0001	19.1642
bZIP	Lsat_1_v5_gn_5_130601	0.02963	0.0516247	0	0.092162
bZIP	Lsat_1_v5_gn_5_149421	0	0	0	0
bZIP	Lsat_1_v5_gn_5_154320	12.4296	7.48482	10.0989	7.83453
bZIP	Lsat_1_v5_gn_5_157020	31.2774	28.0332	26.3063	24.1649
bZIP	Lsat_1_v5_gn_5_157880	22.4081	34.7485	38.7733	39.7683
bZIP	Lsat_1_v5_gn_5_26620	3.13023	1.49425	2.64898	1.43125
bZIP	Lsat_1_v5_gn_5_30441	8.19051	14.0307	3.22292	1.92821
bZIP	Lsat_1_v5_gn_5_58820	81.9525	51.6543	49.2149	39.5447
bZIP	Lsat_1_v5_gn_5_62340	13.5355	10.1846	11.5302	8.96089
bZIP	Lsat_1_v5_gn_5_65440	7.00597	5.22198	5.37981	4.83168
bZIP	Lsat_1_v5_gn_5_71180	19.8101	33.1047	29.9626	42.0844
bZIP	Lsat_1_v5_gn_6_102001	8.12361	19.0731	8.89782	7.14473
bZIP	Lsat_1_v5_gn_6_108501	0	0.551264	1.30014	1.06417
bZIP	Lsat_1_v5_gn_6_110480	11.6635	8.32772	7.12545	4.8006
bZIP	Lsat_1_v5_gn_6_22420	1.75246	10.9559	1.05291	0.443569
bZIP	Lsat_1_v5_gn_6_38701	0.511715	0.113089	0.156476	0.0643067
bZIP	Lsat_1_v5_gn_6_97880	16.7403	29.4925	31.5651	40.8243
bZIP	Lsat_1_v5_gn_7_102900	11.0106	24.4718	4.15655	3.9214
bZIP	Lsat_1_v5_gn_7_102940	11.8323	21.2697	6.85761	5.86884
bZIP	Lsat_1_v5_gn_7_1760	6.01911	15.8867	12.0892	15.3028
bZIP	Lsat_1_v5_gn_7_79540	17.9349	10.7455	10.6979	11.0859
bZIP	Lsat_1_v5_gn_7_86800	9.31686	18.6353	12.2302	9.96165
bZIP	Lsat_1_v5_gn_7_90381	19.1382	21.1686	40.8228	20.976
bZIP	Lsat_1_v5_gn_8_115900	24.4562	14.5141	15.6234	11.1727
bZIP	Lsat_1_v5_gn_8_124541	19.2578	19.9464	18.1824	19.2517
bZIP	Lsat_1_v5_gn_8_126941	38.1784	72.229	58.0955	75.7552
bZIP	Lsat_1_v5_gn_8_13621	12.0991	11.4694	11.0256	6.73888
bZIP	Lsat_1_v5_gn_8_137641	1.07282	0.224799	0	0
bZIP	Lsat_1_v5_gn_8_166781	28.3185	37.7682	52.4232	46.1297
bZIP	Lsat_1_v5_gn_8_35700	0	0	0	0
bZIP	Lsat_1_v5_gn_8_5300	0	0.00555933	0	0.00962767
bZIP	Lsat_1_v5_gn_8_85300	6.37228	3.5178	6.91492	4.75943
bZIP	Lsat_1_v5_gn_8_93660	0	0	0	0
bZIP	Lsat_1_v5_gn_9_108121	2.99828	3.51405	9.27004	7.27455
bZIP	Lsat_1_v5_gn_9_111061	12.7446	123.083	47.8942	21.2629
bZIP	Lsat_1_v5_gn_9_111140	13.5683	19.9453	22.0128	14.257
bZIP	Lsat_1_v5_gn_9_20500	0.144684	0.255973	0.287192	0.258378
bZIP	Lsat_1_v5_gn_9_27821	0.0367873	0.0543487	0	0.018358
bZIP	Lsat_1_v5_gn_9_30361	6.20381	5.0692	6.62402	5.35459
bZIP	Lsat_1_v5_gn_9_40961	30.3294	33.8663	28.2648	24.4876
bZIP	Lsat_1_v5_gn_9_43101	23.1226	7.72894	14.6396	8.29089
bZIP	Lsat_1_v5_gn_9_59881	34.0989	35.3173	24.9141	15.6005
bZIP	Lsat_1_v5_gn_9_77540	1.17143	3.4105	1.288	1.08088
bZIP	Lsat_1_v5_gn_9_99081	24.1235	79.5712	32.33	34.3744
NAC	Lsat_1_v5_gn_0_32180	0.022452	0.371673	0.015857	0.0229717
NAC	Lsat_1_v5_gn_0_37660	0	0	0	0
NAC	Lsat_1_v5_gn_0_45640	0.858661	0.520713	0.483607	0.555218
NAC	Lsat_1_v5_gn_0_9760	69.9633	222.315	158.459	262.936
NAC	Lsat_1_v5_gn_1_10240	0.294337	0.587617	0.828889	1.00505
NAC	Lsat_1_v5_gn_1_103201	0	0	0	0
NAC	Lsat_1_v5_gn_1_14220	0.401966	0.263678	0	0.80369
NAC	Lsat_1_v5_gn_1_18141	1.83924	13.8027	8.77849	21.0491
NAC	Lsat_1_v5_gn_1_24600	0	0	0	0
NAC	Lsat_1_v5_gn_1_28440	0.0530203	0	0	0
NAC	Lsat_1_v5_gn_1_32381	6.92112	2.94698	2.13407	1.69787
NAC	Lsat_1_v5_gn_1_58960	2.09152	1.87255	2.48264	1.75331
NAC	Lsat_1_v5_gn_2_103381	49.8669	70.5508	67.7634	100.556
NAC	Lsat_1_v5_gn_2_103401	19.546	17.8729	25.8405	17.0484
NAC	Lsat_1_v5_gn_2_128940	0.805778	0.865035	0.512919	0.217257
NAC	Lsat_1_v5_gn_2_20040	1.53047	1.50458	0.650025	0.454449
NAC	Lsat_1_v5_gn_2_59341	1.24879	2.87705	1.7366	1.82147
NAC	Lsat_1_v5_gn_2_71740	0.938963	1.06037	0.439226	0.545631
NAC	Lsat_1_v5_gn_2_78720	0.748075	0.842407	0.373122	0.292319
NAC	Lsat_1_v5_gn_2_83520	0	0	0.0102593	0
NAC	Lsat_1_v5_gn_2_89180	0.059968	0.396972	1.35011	1.45744
NAC	Lsat_1_v5_gn_2_91301	4.12628	16.8516	10.735	16.9715
NAC	Lsat_1_v5_gn_3_101901	25.3724	44.0257	21.3645	28.3597
NAC	Lsat_1_v5_gn_3_111800	1.55479	3.4467	6.63203	5.43843
NAC	Lsat_1_v5_gn_3_14701	2.33679	0.693637	4.40936	3.04082
NAC	Lsat_1_v5_gn_3_24581	0.106622	0	0.00740433	0.00910433
NAC	Lsat_1_v5_gn_3_31741	13.8735	14.6389	15.7893	48.0783
NAC	Lsat_1_v5_gn_3_57981	46.1358	34.239	40.4002	32.7868
NAC	Lsat_1_v5_gn_3_67400	0.520682	0.448567	0.193686	0.353053
NAC	Lsat_1_v5_gn_3_73920	0.772277	0.760992	0.392913	0.274349
NAC	Lsat_1_v5_gn_3_99141	0.0583203	0.188925	0.494877	0.0839693
NAC	Lsat_1_v5_gn_4_109600	9.39198	5.67327	3.30164	2.30196
NAC	Lsat_1_v5_gn_4_122120	50.5222	16.1246	22.4868	20.3139
NAC	Lsat_1_v5_gn_4_128500	0	0	0	0
NAC	Lsat_1_v5_gn_4_128561	0	0	0	0
NAC	Lsat_1_v5_gn_4_131860	0	0	0	0
NAC	Lsat_1_v5_gn_4_169300	0.672262	0.494207	0.471597	0.413206
NAC	Lsat_1_v5_gn_4_176860	24.4645	100.147	66.4982	90.0808
NAC	Lsat_1_v5_gn_4_1821	27.0286	38.8583	39.777	21.8193
NAC	Lsat_1_v5_gn_4_66101	1.45937	1.15764	2.57644	2.37185
NAC	Lsat_1_v5_gn_4_71141	10.9927	29.1416	17.6634	26.4915
NAC	Lsat_1_v5_gn_4_86540	0	0	0	0
NAC	Lsat_1_v5_gn_4_9861	0.0141767	0.0765977	0	0
NAC	Lsat_1_v5_gn_5_106180	1.38357	0.907254	0.726682	0.874501
NAC	Lsat_1_v5_gn_5_10860	11.6452	12.2975	12.5629	11.2161
NAC	Lsat_1_v5_gn_5_127660	0.0474593	0	0	0.0129507
NAC	Lsat_1_v5_gn_5_146440	1.66348	1.28068	1.31189	1.4297
NAC	Lsat_1_v5_gn_5_165541	1.27486	1.61435	1.32576	5.01963
NAC	Lsat_1_v5_gn_5_165561	3.44383	2.06558	0.626158	1.2636
NAC	Lsat_1_v5_gn_5_183661	1.04335	1.73747	6.14176	2.76397
NAC	Lsat_1_v5_gn_5_20601	0.660643	0.881647	1.01438	0.490534
NAC	Lsat_1_v5_gn_5_7401	1.82647	0.451929	2.32809	1.59323
NAC	Lsat_1_v5_gn_5_981	0.246986	0.0851257	0.1112	0.087561
NAC	Lsat_1_v5_gn_6_100121	0	0.0952287	0	0
NAC	Lsat_1_v5_gn_6_11620	3.05449	0.899898	6.0815	3.85813
NAC	Lsat_1_v5_gn_6_2320	0.514775	0.580941	0.263695	0.111186
NAC	Lsat_1_v5_gn_6_30441	0	0	0	0
NAC	Lsat_1_v5_gn_6_38101	0.483717	0.497749	0.188868	0.381246
NAC	Lsat_1_v5_gn_6_38501	9.37768	1.03011	0.523084	0.742563
NAC	Lsat_1_v5_gn_6_46681	0	0	0	0
NAC	Lsat_1_v5_gn_6_56420	4.50562	14.9557	10.5836	9.83533
NAC	Lsat_1_v5_gn_6_56440	2.25532	5.9013	1.71273	3.70198
NAC	Lsat_1_v5_gn_6_56480	3.06467	8.59922	1.9998	9.07223
NAC	Lsat_1_v5_gn_6_64840	0.141422	0.0937927	0.0690363	0.0832107
NAC	Lsat_1_v5_gn_6_80600	0	0	0	0
NAC	Lsat_1_v5_gn_6_80780	29.1243	8.22706	12.9766	8.99028
NAC	Lsat_1_v5_gn_6_81580	1.71758	1.39801	5.58792	3.02914
NAC	Lsat_1_v5_gn_6_87981	0.738516	0.638052	0.413552	1.21945
NAC	Lsat_1_v5_gn_6_90240	1.28935	0.861612	0.663103	0.463964
NAC	Lsat_1_v5_gn_6_9421	27.0704	30.809	25.4432	32.6513
NAC	Lsat_1_v5_gn_6_99940	0.0110947	0.0727637	0.00782233	0
NAC	Lsat_1_v5_gn_6_99960	50.2074	69.2981	75.7046	84.1748
NAC	Lsat_1_v5_gn_7_104460	0.650424	0.139111	0	0.0261847
NAC	Lsat_1_v5_gn_7_105640	0.536605	33.5533	11.9162	47.6828
NAC	Lsat_1_v5_gn_7_105761	2.40628	6.99787	14.9054	8.47704
NAC	Lsat_1_v5_gn_7_112441	0.806903	0.145491	0.114183	0.191791
NAC	Lsat_1_v5_gn_7_18860	0	0	0	0
NAC	Lsat_1_v5_gn_7_18921	0	0	0	0
NAC	Lsat_1_v5_gn_7_19440	0.16747	0.0257797	0.0316237	0.034748
NAC	Lsat_1_v5_gn_7_19701	0	0	0	0
NAC	Lsat_1_v5_gn_7_22221	2.29488	2.62648	2.86051	2.49549
NAC	Lsat_1_v5_gn_7_29640	0	0	0	0
NAC	Lsat_1_v5_gn_7_30741	1.91829	2.28763	1.73601	2.0729
NAC	Lsat_1_v5_gn_7_30761	2.99349	2.87274	3.03126	3.74937
NAC	Lsat_1_v5_gn_7_38860	3.08276	1.44144	1.10736	0.85045
NAC	Lsat_1_v5_gn_7_68761	0.276124	1.0656	0.575394	0.288416
NAC	Lsat_1_v5_gn_7_80581	1.05933	1.68496	1.35197	0.704291
NAC	Lsat_1_v5_gn_8_17420	48.69	24.9136	30.231	25.3875
NAC	Lsat_1_v5_gn_8_17440	66.4033	90.7969	89.7813	88.1433
NAC	Lsat_1_v5_gn_8_3961	11.7015	9.20926	9.63226	8.19119
NAC	Lsat_1_v5_gn_8_50780	0.665955	0.24992	0.118816	0.134816
NAC	Lsat_1_v5_gn_8_51721	0	0	0	0
NAC	Lsat_1_v5_gn_9_10341	1.04233	1.61518	2.45561	1.28285
NAC	Lsat_1_v5_gn_9_42720	14.0379	13.0118	11.4676	9.47729
NAC	Lsat_1_v5_gn_9_48560	0.674379	0.052271	0	0
NAC	Lsat_1_v5_gn_9_52241	0.343904	0.272735	0.284153	0.106333
NAC	Lsat_1_v5_gn_9_71421	22.5738	13.7714	16.4915	12.4152
NAC	Lsat_1_v5_gn_9_79840	0.110063	0.011846	0.108184	0.010295
NAC	Lsat_1_v5_gn_9_82461	0.534058	1.22368	0.345033	0.361315
NAC	Lsat_1_v5_gn_9_95120	0.427513	0.412088	0.177261	1.07604
NAC	Lsat_1_v5_gn_9_96041	0.068828	0.163726	0.0489507	0.114898
C2H2	Lactuca_sativa_newGene_2491	4.75832	18.4947	13.7689	20.6834
C2H2	Lactuca_sativa_newGene_5234	1.64962	1.54696	1.73897	0.913981
C2H2	Lactuca_sativa_newGene_5615	5.0615	2.46608	3.89242	2.845
C2H2	Lactuca_sativa_newGene_6859	0.532163	8.79572	1.18174	5.74652
C2H2	Lactuca_sativa_newGene_7503	0.46167	0.476699	0.487655	0.284815
C2H2	Lactuca_sativa_newGene_96	9.67947	5.43788	5.12471	4.64487
C2H2	Lsat_1_v5_gn_0_11100	14.9864	12.8847	10.452	6.18617
C2H2	Lsat_1_v5_gn_1_107620	2.16033	1.03283	2.03507	0.587336
C2H2	Lsat_1_v5_gn_1_13660	0.432591	0.435642	0.703427	0.438002
C2H2	Lsat_1_v5_gn_1_18461	41.4519	43.4581	41.6827	30.7583
C2H2	Lsat_1_v5_gn_1_24181	58.5463	234.857	194.122	321.454
C2H2	Lsat_1_v5_gn_1_28420	0.139923	0.351517	0.500146	0.430752
C2H2	Lsat_1_v5_gn_1_28820	9.97273	7.75181	12.3347	7.68385
C2H2	Lsat_1_v5_gn_1_50361	177.836	159.843	106.66	84.5701
C2H2	Lsat_1_v5_gn_1_51300	0.500818	0.770736	0.282941	0.30224
C2H2	Lsat_1_v5_gn_1_65581	5.69787	3.46481	1.17412	0.656063
C2H2	Lsat_1_v5_gn_1_87440	0.101661	0.0262097	0.0205597	0
C2H2	Lsat_1_v5_gn_2_100640	2.64706	1.62583	2.10893	1.17211
C2H2	Lsat_1_v5_gn_2_103521	0.0110483	0.103938	0.116713	0.0753293
C2H2	Lsat_1_v5_gn_2_10861	4.46156	3.7137	2.13277	1.01283
C2H2	Lsat_1_v5_gn_2_109221	9.57037	3.70225	1.79274	0.925267
C2H2	Lsat_1_v5_gn_2_112720	7.09364	5.25242	5.09577	5.42038
C2H2	Lsat_1_v5_gn_2_117620	4.09508	68.107	37.3399	105.85
C2H2	Lsat_1_v5_gn_2_118681	0	0	0	0
C2H2	Lsat_1_v5_gn_2_14120	7.30778	11.7315	6.94565	4.87229
C2H2	Lsat_1_v5_gn_2_21361	8.87341	5.75771	5.64102	5.2348
C2H2	Lsat_1_v5_gn_2_76741	16.0838	11.8741	10.2641	9.6477
C2H2	Lsat_1_v5_gn_2_93161	5.1893	3.59869	2.87112	2.42415
C2H2	Lsat_1_v5_gn_2_98240	11.3092	16.337	17.5629	10.9985
C2H2	Lsat_1_v5_gn_2_99900	0.269401	0.504795	0.12808	0.126167
C2H2	Lsat_1_v5_gn_3_1101	0.389216	0.234923	0.0338243	0.0927467
C2H2	Lsat_1_v5_gn_3_112500	8.26634	4.69877	4.93182	2.71458
C2H2	Lsat_1_v5_gn_3_122421	0	0	0	0
C2H2	Lsat_1_v5_gn_3_122500	0	0	0	0
C2H2	Lsat_1_v5_gn_3_129301	0	0	0	0
C2H2	Lsat_1_v5_gn_3_13140	0	0	0	0
C2H2	Lsat_1_v5_gn_3_17560	0.142995	0	0.047757	0
C2H2	Lsat_1_v5_gn_3_35760	0	0.017609	0	0.026188
C2H2	Lsat_1_v5_gn_3_48800	0	0.0369857	0	0
C2H2	Lsat_1_v5_gn_3_49580	2.43378	0.546929	0.868795	0.87279
C2H2	Lsat_1_v5_gn_3_51700	12.1952	10.2237	8.54006	7.5861
C2H2	Lsat_1_v5_gn_3_57900	0	0	0	0
C2H2	Lsat_1_v5_gn_3_66921	0	0	0	0
C2H2	Lsat_1_v5_gn_3_82380	0	0	0	0
C2H2	Lsat_1_v5_gn_3_9161	0	0	0	0
C2H2	Lsat_1_v5_gn_3_9241	0.026785	0	0	0
C2H2	Lsat_1_v5_gn_3_98001	0.523461	0.469906	0.677481	0.349772
C2H2	Lsat_1_v5_gn_4_10281	9.9673	8.96733	6.80313	6.44944
C2H2	Lsat_1_v5_gn_4_109861	1.04421	1.26679	1.9221	0.947229
C2H2	Lsat_1_v5_gn_4_111021	18.9864	17.5245	9.82695	7.37034
C2H2	Lsat_1_v5_gn_4_120460	33.4345	69.2591	60.3383	74.8908
C2H2	Lsat_1_v5_gn_4_127200	5.57455	2.32245	2.21374	1.3736
C2H2	Lsat_1_v5_gn_4_130320	7.39261	57.4381	71.1301	124.555
C2H2	Lsat_1_v5_gn_4_140800	75.7619	45.486	58.3772	47.7004
C2H2	Lsat_1_v5_gn_4_19960	0.361158	0	0.023945	0.025308
C2H2	Lsat_1_v5_gn_4_21761	0.285038	0.184189	0.185193	0.142406
C2H2	Lsat_1_v5_gn_4_22261	39.2446	23.3398	24.3755	20.2304
C2H2	Lsat_1_v5_gn_4_25401	4.27347	2.5157	3.53524	3.17727
C2H2	Lsat_1_v5_gn_4_45420	0.00528867	0.254328	0.187919	0.177205
C2H2	Lsat_1_v5_gn_4_57900	0.575748	0.565966	0.257432	0.254064
C2H2	Lsat_1_v5_gn_4_6600	8.08346	6.46565	5.50386	3.58352
C2H2	Lsat_1_v5_gn_4_66301	2.18545	0.519413	0.165204	0.089263
C2H2	Lsat_1_v5_gn_4_84301	11.4434	20.5146	8.53967	7.7691
C2H2	Lsat_1_v5_gn_5_154101	0.05457	0	0	0
C2H2	Lsat_1_v5_gn_5_154721	0.01113	0.0416443	0	0.0574573
C2H2	Lsat_1_v5_gn_5_168420	3.78101	101.962	81.9461	135.652
C2H2	Lsat_1_v5_gn_5_168460	5.53396	169.882	113.451	145.621
C2H2	Lsat_1_v5_gn_5_171660	5.08871	30.9448	22.565	15.0547
C2H2	Lsat_1_v5_gn_5_181660	0	0	0	0
C2H2	Lsat_1_v5_gn_5_185501	46.2697	72.791	78.6781	58.5001
C2H2	Lsat_1_v5_gn_5_189320	0	0	0	0.0661787
C2H2	Lsat_1_v5_gn_5_21920	0.557922	0.389753	1.81784	1.19222
C2H2	Lsat_1_v5_gn_5_21940	10.8866	8.71232	7.31173	5.03438
C2H2	Lsat_1_v5_gn_5_21960	4.49193	4.2616	2.76862	1.85944
C2H2	Lsat_1_v5_gn_5_22480	7.80784	6.57396	4.92107	3.60437
C2H2	Lsat_1_v5_gn_5_34921	1.19651	0.765933	0.472711	0.673104
C2H2	Lsat_1_v5_gn_5_35960	15.3831	10.1678	14.0469	10.3583
C2H2	Lsat_1_v5_gn_5_36021	0.00917067	0	0	0
C2H2	Lsat_1_v5_gn_5_4521	5.40467	3.95533	2.27877	1.46918
C2H2	Lsat_1_v5_gn_5_46400	13.8594	10.3822	15.3284	12.8689
C2H2	Lsat_1_v5_gn_5_72260	0.0142147	0	0.0319933	0.00976167
C2H2	Lsat_1_v5_gn_5_86201	0.0604723	0.01416	0	0
C2H2	Lsat_1_v5_gn_5_90221	0	0	0	0
C2H2	Lsat_1_v5_gn_5_9541	26.6055	26.5851	22.8907	21.5636
C2H2	Lsat_1_v5_gn_6_14101	15.8424	9.23927	14.6337	8.88464
C2H2	Lsat_1_v5_gn_6_19301	7.47523	8.57101	8.04983	14.0958
C2H2	Lsat_1_v5_gn_6_19901	19.498	9.59467	10.6493	8.66279
C2H2	Lsat_1_v5_gn_6_27120	15.2119	28.5929	26.7371	50.5797
C2H2	Lsat_1_v5_gn_6_28380	0.292856	0.593772	0.219267	0.335169
C2H2	Lsat_1_v5_gn_6_40340	8.54507	1.78644	2.49468	2.17518
C2H2	Lsat_1_v5_gn_6_43360	2.232	2.40909	2.71362	0.799056
C2H2	Lsat_1_v5_gn_6_43460	0.289433	0.031349	0.027054	0.0299493
C2H2	Lsat_1_v5_gn_6_46760	39.8201	35.3728	35.2123	32.7437
C2H2	Lsat_1_v5_gn_6_47221	0.303408	0	0	0.0209843
C2H2	Lsat_1_v5_gn_6_64901	0.328428	0.022375	0	0
C2H2	Lsat_1_v5_gn_6_71681	1.43021	1.68139	0.881696	0.813882
C2H2	Lsat_1_v5_gn_7_10021	0.462364	0.221763	0.023642	0.10852
C2H2	Lsat_1_v5_gn_7_17321	11.5835	9.91939	12.2527	10.0004
C2H2	Lsat_1_v5_gn_7_46160	8.75219	11.7791	11.5914	9.28136
C2H2	Lsat_1_v5_gn_7_54420	0	0	0	0
C2H2	Lsat_1_v5_gn_7_74201	0	0	0.0862343	0
C2H2	Lsat_1_v5_gn_7_82001	2.6699	2.19366	2.0634	1.3661
C2H2	Lsat_1_v5_gn_7_85360	4.67519	27.9228	27.5489	16.7165
C2H2	Lsat_1_v5_gn_7_85700	0.029379	0	0	0
C2H2	Lsat_1_v5_gn_7_85840	13.8384	6.49986	4.43939	2.39962
C2H2	Lsat_1_v5_gn_8_106840	40.1201	33.5616	35.8493	29.0399
C2H2	Lsat_1_v5_gn_8_121041	0	0.0172913	0	0
C2H2	Lsat_1_v5_gn_8_160061	6.9393	8.45277	7.57534	7.19408
C2H2	Lsat_1_v5_gn_8_160440	10.8071	5.30793	9.04159	7.25212
C2H2	Lsat_1_v5_gn_8_16081	0.895915	1.56103	0.59134	6.33896
C2H2	Lsat_1_v5_gn_8_34221	13.3914	6.61992	7.28768	5.6901
C2H2	Lsat_1_v5_gn_8_35801	44.1493	26.5264	37.699	22.7629
C2H2	Lsat_1_v5_gn_8_40481	0.118309	0	0	0
C2H2	Lsat_1_v5_gn_8_47501	0.325723	0.402359	0.670352	0.310083
C2H2	Lsat_1_v5_gn_8_47521	0.170796	0.115836	0.0377663	0.105478
C2H2	Lsat_1_v5_gn_8_67241	0	0	0	0
C2H2	Lsat_1_v5_gn_8_72740	0	0	0.100837	0.0451437
C2H2	Lsat_1_v5_gn_8_77560	2.09568	8.32138	1.78289	2.20167
C2H2	Lsat_1_v5_gn_8_91341	0.0192407	0	0.0541603	0
C2H2	Lsat_1_v5_gn_9_111840	13.5573	81.1862	54.2963	121.627
C2H2	Lsat_1_v5_gn_9_124220	19.0769	16.3875	20.5399	27.5969
C2H2	Lsat_1_v5_gn_9_124521	0	0	0	0
C2H2	Lsat_1_v5_gn_9_20121	16.8283	28.0047	16.8369	19.4435
C2H2	Lsat_1_v5_gn_9_24921	0	0	0	0
C2H2	Lsat_1_v5_gn_9_28480	5.00533	2.40043	1.79458	1.51342
C2H2	Lsat_1_v5_gn_9_28700	17.1005	86.3695	58.7618	126.302
C2H2	Lsat_1_v5_gn_9_36460	0	0	0	0
C2H2	Lsat_1_v5_gn_9_36521	0	0	0	0
C2H2	Lsat_1_v5_gn_9_55160	4.79184	6.27492	5.4644	4.68647
C2H2	Lsat_1_v5_gn_9_64040	0.771043	0.16245	0.301367	0.114134
C2H2	Lsat_1_v5_gn_9_71281	0.0145563	0	0	0
C2H2	Lsat_1_v5_gn_9_71780	0	0	0	0
C2H2	Lsat_1_v5_gn_9_88600	0.0822973	0.096516	0.12736	0.151828
C2H2	Lsat_1_v5_gn_9_9241	0.654115	0.0378563	0.112027	0.143121
C2H2	Lsat_1_v5_gn_9_95041	7.26681	9.84423	6.38481	3.34492
C2H2	Lsat_1_v5_gn_9_99300	23.0483	12.3451	11.321	9.04882
bHLH	Lactuca_sativa_newGene_2455	0.697634	0.965252	0.725287	0.970621
bHLH	Lactuca_sativa_newGene_3318	32.8478	21.4267	28.0532	11.6225
bHLH	Lsat_1_v5_gn_0_22701	15.9944	8.31657	7.60609	5.57577
bHLH	Lsat_1_v5_gn_1_110041	20.0117	11.7996	18.277	17.7976
bHLH	Lsat_1_v5_gn_1_13141	0	0	0	0
bHLH	Lsat_1_v5_gn_1_14940	27.903	28.2503	40.7296	34.5724
bHLH	Lsat_1_v5_gn_1_1761	0.0776233	0.0670027	0.0308093	0
bHLH	Lsat_1_v5_gn_1_24280	0	0	0	0
bHLH	Lsat_1_v5_gn_1_32261	3.46815	3.60729	2.98	2.43435
bHLH	Lsat_1_v5_gn_1_33401	0	0	0	0
bHLH	Lsat_1_v5_gn_1_36620	0	0	0	0
bHLH	Lsat_1_v5_gn_1_64640	0	0	0.0124433	0
bHLH	Lsat_1_v5_gn_1_681	17.5277	7.09177	7.73394	4.91872
bHLH	Lsat_1_v5_gn_1_70060	39.7313	40.9248	29.7458	25.3137
bHLH	Lsat_1_v5_gn_1_85520	0.151184	0.152777	0.356378	0.342374
bHLH	Lsat_1_v5_gn_1_96101	69.6263	109.591	121.928	122.143
bHLH	Lsat_1_v5_gn_2_101000	13.4821	7.27998	7.89772	4.59036
bHLH	Lsat_1_v5_gn_2_130100	1.6194	7.81213	5.12639	3.6728
bHLH	Lsat_1_v5_gn_2_134201	0.173819	0	0	0
bHLH	Lsat_1_v5_gn_2_44720	0.30185	0.320295	0	0
bHLH	Lsat_1_v5_gn_2_70840	7.32178	0.760318	0.713333	0.289778
bHLH	Lsat_1_v5_gn_2_76540	0.518449	3.64644	3.94974	2.03276
bHLH	Lsat_1_v5_gn_2_81721	0.301919	0.810388	1.28533	1.27105
bHLH	Lsat_1_v5_gn_2_81741	0	0	0	0
bHLH	Lsat_1_v5_gn_2_81801	0	0	0	0
bHLH	Lsat_1_v5_gn_2_84020	0	0	0	0
bHLH	Lsat_1_v5_gn_2_88961	0.640227	3.13301	1.2125	1.66858
bHLH	Lsat_1_v5_gn_3_100601	2.43835	2.56915	0.841027	0.688541
bHLH	Lsat_1_v5_gn_3_129041	4.18762	16.8557	1.36496	1.581
bHLH	Lsat_1_v5_gn_3_140101	9.26528	44.3316	37.7744	63.5935
bHLH	Lsat_1_v5_gn_3_17861	89.3069	254.329	207.801	218.251
bHLH	Lsat_1_v5_gn_3_18641	10.5319	10.32	12.6658	5.05913
bHLH	Lsat_1_v5_gn_3_27360	1.6817	0.674632	0.318334	0.395809
bHLH	Lsat_1_v5_gn_3_43060	0.0538773	0.269201	0.386343	0.735284
bHLH	Lsat_1_v5_gn_3_50120	11.7653	14.1246	8.04079	10.2675
bHLH	Lsat_1_v5_gn_3_50900	3.03139	2.26479	0.018213	0
bHLH	Lsat_1_v5_gn_3_58041	10.1422	5.05884	3.42479	1.48296
bHLH	Lsat_1_v5_gn_3_58900	0	0	0	0
bHLH	Lsat_1_v5_gn_3_61721	0	0	0	0
bHLH	Lsat_1_v5_gn_3_6560	0.843905	0.334864	0.906162	0.855448
bHLH	Lsat_1_v5_gn_3_81200	0	0	0	0
bHLH	Lsat_1_v5_gn_3_83561	0.529917	1.10871	0.286748	0.248471
bHLH	Lsat_1_v5_gn_3_84261	0.08376	2.68937	1.8518	10.4702
bHLH	Lsat_1_v5_gn_3_90620	3.75868	1.60044	2.49829	2.25068
bHLH	Lsat_1_v5_gn_3_96981	7.76301	7.64254	7.74072	5.96828
bHLH	Lsat_1_v5_gn_4_106001	4.51253	2.93572	2.47722	6.32805
bHLH	Lsat_1_v5_gn_4_110001	0.0311173	0.01689	0.00805233	0.0710743
bHLH	Lsat_1_v5_gn_4_126721	0.239856	0.0386633	0.012406	0
bHLH	Lsat_1_v5_gn_4_126860	13.8506	10.6957	7.1884	5.19047
bHLH	Lsat_1_v5_gn_4_131280	0	0	0	0
bHLH	Lsat_1_v5_gn_4_135821	12.7266	13.9623	13.0094	13.7843
bHLH	Lsat_1_v5_gn_4_144860	3.33661	2.98127	3.26896	1.38992
bHLH	Lsat_1_v5_gn_4_157941	12.0791	8.36938	14.3442	9.57624
bHLH	Lsat_1_v5_gn_4_158841	0.122491	6.42382	3.47858	15.9926
bHLH	Lsat_1_v5_gn_4_158881	0.016821	0.188846	0.130465	1.75693
bHLH	Lsat_1_v5_gn_4_158921	0.0314157	0.386482	0.397179	1.98362
bHLH	Lsat_1_v5_gn_4_164941	6.93637	2.46084	2.89678	1.72751
bHLH	Lsat_1_v5_gn_4_16500	0.053079	0	0	0
bHLH	Lsat_1_v5_gn_4_165621	0.331813	0.463836	0	0.040658
bHLH	Lsat_1_v5_gn_4_177861	0.277153	0	0.0392007	0
bHLH	Lsat_1_v5_gn_4_19561	2.02986	1.2583	1.82704	0.754946
bHLH	Lsat_1_v5_gn_4_32381	11.9898	3.77467	4.2858	5.04731
bHLH	Lsat_1_v5_gn_4_33781	41.4624	95.429	115.551	141.595
bHLH	Lsat_1_v5_gn_4_40321	0.0660057	0.235185	0.080255	0.069096
bHLH	Lsat_1_v5_gn_4_46160	34.3559	9.46346	17.9632	7.89655
bHLH	Lsat_1_v5_gn_4_49501	7.37685	10.7191	16.5508	17.9895
bHLH	Lsat_1_v5_gn_4_52301	6.50979	0.754484	0.542025	0.3901
bHLH	Lsat_1_v5_gn_4_57480	19.2887	17.8946	16.7068	16.197
bHLH	Lsat_1_v5_gn_4_61220	5.8345	13.6349	12.2341	15.0126
bHLH	Lsat_1_v5_gn_4_71800	2.57642	1.77974	1.12949	1.12293
bHLH	Lsat_1_v5_gn_4_83840	16.5351	5.95909	9.04911	5.29955
bHLH	Lsat_1_v5_gn_4_97221	0.0590827	0.108594	0	0
bHLH	Lsat_1_v5_gn_5_10001	14.3632	8.60591	6.74275	4.00666
bHLH	Lsat_1_v5_gn_5_10781	0.0395367	0.018245	0.014777	0.04675
bHLH	Lsat_1_v5_gn_5_110681	0.420662	1.32931	2.90086	5.51335
bHLH	Lsat_1_v5_gn_5_114241	0	0	0	0
bHLH	Lsat_1_v5_gn_5_114261	0	0	0	0
bHLH	Lsat_1_v5_gn_5_119080	35.4413	13.6524	9.47739	10.7009
bHLH	Lsat_1_v5_gn_5_149161	35.3583	19.0797	28.6175	20.2057
bHLH	Lsat_1_v5_gn_5_155841	2.59103	2.15813	2.22463	1.97332
bHLH	Lsat_1_v5_gn_5_158120	1.59578	5.81779	2.46962	3.0539
bHLH	Lsat_1_v5_gn_5_158220	0.29768	0.15768	0.115934	0.141025
bHLH	Lsat_1_v5_gn_5_158260	0.0426387	0.016945	0.0210373	0.0144767
bHLH	Lsat_1_v5_gn_5_158300	0.011431	0	0	0
bHLH	Lsat_1_v5_gn_5_158400	0.056624	0.0124463	0	0
bHLH	Lsat_1_v5_gn_5_163941	9.29089	5.00014	6.6326	3.71277
bHLH	Lsat_1_v5_gn_5_17640	17.2507	8.02392	5.05523	3.29677
bHLH	Lsat_1_v5_gn_5_178960	14.9737	12.1731	21.4388	17.5707
bHLH	Lsat_1_v5_gn_5_179121	3.04018	1.53261	1.9106	1.54947
bHLH	Lsat_1_v5_gn_5_18801	0.270993	0.576716	0.175707	0.160575
bHLH	Lsat_1_v5_gn_5_18860	0.0522403	0	0	0
bHLH	Lsat_1_v5_gn_5_24661	20.5434	13.6842	19.5668	11.0463
bHLH	Lsat_1_v5_gn_5_4821	2.66674	8.55787	5.37996	6.10921
bHLH	Lsat_1_v5_gn_5_5640	26.2054	24.8198	29.995	29.5353
bHLH	Lsat_1_v5_gn_5_67340	18.8034	14.1607	23.0262	19.3305
bHLH	Lsat_1_v5_gn_5_83461	5.5857	7.00916	6.44926	31.68
bHLH	Lsat_1_v5_gn_6_107660	39.5855	21.8408	33.1339	14.912
bHLH	Lsat_1_v5_gn_6_112320	0	0	0	0
bHLH	Lsat_1_v5_gn_6_48561	29.0545	25.6911	25.5912	24.2719
bHLH	Lsat_1_v5_gn_6_58420	27.9245	14.2637	13.6753	10.5542
bHLH	Lsat_1_v5_gn_6_65141	26.3097	22.9208	29.0099	24.9678
bHLH	Lsat_1_v5_gn_6_7360	38.2956	11.1963	13.7397	10.2101
bHLH	Lsat_1_v5_gn_6_80380	21.5722	20.6949	8.03204	5.31278
bHLH	Lsat_1_v5_gn_6_81901	0.017635	0.167814	0.313954	0.256025
bHLH	Lsat_1_v5_gn_6_92040	31.3366	25.3333	16.0027	15.5541
bHLH	Lsat_1_v5_gn_7_10141	7.3457	12.2129	5.39915	4.09101
bHLH	Lsat_1_v5_gn_7_108280	30.957	21.4537	13.6954	10.9257
bHLH	Lsat_1_v5_gn_7_18241	12.1387	17.5056	11.2617	10.0461
bHLH	Lsat_1_v5_gn_7_36701	0.905211	0.117403	0.0548743	0.539747
bHLH	Lsat_1_v5_gn_7_48681	22.8543	24.678	11.2148	13.5083
bHLH	Lsat_1_v5_gn_7_83480	0.281521	0.612098	0.913704	16.0285
bHLH	Lsat_1_v5_gn_7_85221	0.114678	0.250019	0.286821	0.627665
bHLH	Lsat_1_v5_gn_7_91021	68.2612	21.786	21.8499	17.042
bHLH	Lsat_1_v5_gn_8_102320	0.026532	0	0.137882	0.012439
bHLH	Lsat_1_v5_gn_8_125901	6.92482	13.2234	9.26529	13.2741
bHLH	Lsat_1_v5_gn_8_129501	12.7675	9.52594	6.7665	6.97678
bHLH	Lsat_1_v5_gn_8_136380	0	0	0	0.0741143
bHLH	Lsat_1_v5_gn_8_138940	2.03256	0.555155	1.30965	0.606282
bHLH	Lsat_1_v5_gn_8_155680	2.01024	0.926447	1.39339	1.11251
bHLH	Lsat_1_v5_gn_8_162041	2.63413	2.69128	1.79453	1.60572
bHLH	Lsat_1_v5_gn_8_31220	4.40256	1.76121	1.48014	4.92988
bHLH	Lsat_1_v5_gn_8_36721	8.55796	4.92849	4.64132	5.04796
bHLH	Lsat_1_v5_gn_8_36960	19.3804	14.3897	15.5852	14.6692
bHLH	Lsat_1_v5_gn_8_52080	1.42981	3.14591	0	0.161205
bHLH	Lsat_1_v5_gn_8_6081	1.16082	0.110292	0.027062	0.0100473
bHLH	Lsat_1_v5_gn_8_62120	0.234853	0.008541	0.0265027	0
bHLH	Lsat_1_v5_gn_8_69161	1.60509	1.20789	0.941058	2.19842
bHLH	Lsat_1_v5_gn_9_110961	0	0	0	0.0142153
bHLH	Lsat_1_v5_gn_9_11161	18.3043	9.28207	6.36101	3.82397
bHLH	Lsat_1_v5_gn_9_114500	3.70357	4.17067	9.59375	9.09455
bHLH	Lsat_1_v5_gn_9_17741	7.12619	3.58987	5.32513	3.52454
bHLH	Lsat_1_v5_gn_9_28321	10.5787	9.78784	4.31477	2.54886
bHLH	Lsat_1_v5_gn_9_28401	14.5423	20.9159	10.3609	9.80671
bHLH	Lsat_1_v5_gn_9_4200	1.27926	2.00606	0.308356	0.287572
bHLH	Lsat_1_v5_gn_9_53541	0.0169757	0	0	0
bHLH	Lsat_1_v5_gn_9_57820	0.0684183	0.414209	0.033586	0.0882033
bHLH	Lsat_1_v5_gn_9_62260	2.93563	0.546372	2.26701	2.17375
bHLH	Lsat_1_v5_gn_9_74300	20.0469	3.67637	5.27541	3.52935
bHLH	Lsat_1_v5_gn_9_8180	75.1223	35.3874	42.4197	32.459
bHLH	Lsat_1_v5_gn_9_9421	21.2272	19.5204	21.2269	19.9569
MYB	Lactuca_sativa_newGene_2776	0.571823	0.967736	5.60278	4.67209
MYB	Lactuca_sativa_newGene_4979	10.477	6.69289	9.53328	7.1476
MYB	Lactuca_sativa_newGene_7444	0.589158	0.71625	0.0966563	0.22347
MYB	Lsat_1_v5_gn_0_10220	0.166728	0.01166	0.684986	0.334105
MYB	Lsat_1_v5_gn_0_13500	0	0	0	0
MYB	Lsat_1_v5_gn_0_15901	0.07809	0.351167	0.538556	1.33522
MYB	Lsat_1_v5_gn_0_36780	0	0	0	0
MYB	Lsat_1_v5_gn_0_39281	6.99234	4.1227	7.73948	4.7678
MYB	Lsat_1_v5_gn_0_40341	2.58238	1.73726	2.3385	2.36402
MYB	Lsat_1_v5_gn_0_8241	10.3253	6.8214	9.37761	13.9002
MYB	Lsat_1_v5_gn_1_106980	1.45123	1.33309	2.99668	1.6617
MYB	Lsat_1_v5_gn_1_114120	0	0	0	0
MYB	Lsat_1_v5_gn_1_12600	1.06888	1.35237	0.753521	1.27287
MYB	Lsat_1_v5_gn_1_19840	8.55185	29.14	30.2447	32.407
MYB	Lsat_1_v5_gn_1_22901	6.56247	10.3507	9.00004	9.17702
MYB	Lsat_1_v5_gn_1_27140	0.0632677	0.024153	0.00866367	0.0534393
MYB	Lsat_1_v5_gn_1_35681	0	0	0	0
MYB	Lsat_1_v5_gn_1_3920	0.057552	0	0.0214023	0
MYB	Lsat_1_v5_gn_1_44060	0.01234	0.0176157	0	0
MYB	Lsat_1_v5_gn_1_51660	20.1113	7.58333	14.9037	11.4238
MYB	Lsat_1_v5_gn_1_62660	0	0	0.0189827	0
MYB	Lsat_1_v5_gn_1_76001	0.529122	0.12828	0.200036	0.597117
MYB	Lsat_1_v5_gn_1_9561	0.413971	0.279307	1.41646	1.08779
MYB	Lsat_1_v5_gn_2_105481	0	0	0	0
MYB	Lsat_1_v5_gn_2_105521	2.14187	3.74764	2.6142	2.09235
MYB	Lsat_1_v5_gn_2_107241	2.71642	0.349384	0.0983923	0.079136
MYB	Lsat_1_v5_gn_2_113780	28.9724	17.1687	21.9368	16.243
MYB	Lsat_1_v5_gn_2_120221	4.4313	4.10679	2.74037	1.92207
MYB	Lsat_1_v5_gn_2_124061	0.139989	0.083595	0.139499	0.145129
MYB	Lsat_1_v5_gn_2_125100	8.83951	21.6488	13.5054	14.6306
MYB	Lsat_1_v5_gn_2_131860	0	0.0143727	0	0
MYB	Lsat_1_v5_gn_2_131920	16.5088	44.2352	47.8775	52.9084
MYB	Lsat_1_v5_gn_2_31860	0.791702	0.765148	0.0145517	0.027458
MYB	Lsat_1_v5_gn_2_46221	0	0	0	0
MYB	Lsat_1_v5_gn_2_6321	0.309045	0.0844863	0.1501	0.0217877
MYB	Lsat_1_v5_gn_2_85541	26.7038	11.6485	16.4293	16.3813
MYB	Lsat_1_v5_gn_2_89421	6.63305	6.03462	17.3832	14.7714
MYB	Lsat_1_v5_gn_2_99420	0.0980437	0.0108823	0	0.00919333
MYB	Lsat_1_v5_gn_3_104701	0	0	0.0730333	0.088486
MYB	Lsat_1_v5_gn_3_120520	1.61046	0.0790233	0.0141203	0.0281463
MYB	Lsat_1_v5_gn_3_12421	1.34089	18.8238	2.65332	4.25089
MYB	Lsat_1_v5_gn_3_12501	3.96497	7.44652	0.57196	0.37929
MYB	Lsat_1_v5_gn_3_136600	1.65244	0.612429	0.101202	0.165141
MYB	Lsat_1_v5_gn_3_22761	13.7581	11.1718	7.86638	8.05522
MYB	Lsat_1_v5_gn_3_2600	1.21145	0.572482	2.58084	2.70448
MYB	Lsat_1_v5_gn_3_34521	12.4488	13.9545	12.2682	8.88944
MYB	Lsat_1_v5_gn_3_36880	0	0	0	0
MYB	Lsat_1_v5_gn_3_38660	0	0.026028	0.028003	0
MYB	Lsat_1_v5_gn_3_38940	0.774299	0.100896	0	0.108585
MYB	Lsat_1_v5_gn_3_39020	0.0993497	0.356471	0.0532937	0.548936
MYB	Lsat_1_v5_gn_3_39080	2.34366	0.899745	0.135279	0.157542
MYB	Lsat_1_v5_gn_3_40760	0	0	0	0
MYB	Lsat_1_v5_gn_3_40800	0.0665527	0.0406813	0.150721	0.421118
MYB	Lsat_1_v5_gn_3_46481	9.56985	3.92983	5.99652	3.20253
MYB	Lsat_1_v5_gn_3_51140	7.36709	2.80537	2.13069	3.18594
MYB	Lsat_1_v5_gn_3_57100	0.215598	0.066179	0.0744967	0.233385
MYB	Lsat_1_v5_gn_3_63660	2.88723	8.18271	4.902	4.58533
MYB	Lsat_1_v5_gn_3_71181	2.29963	0.102162	0.11913	0.125008
MYB	Lsat_1_v5_gn_3_71241	0	0	0	0
MYB	Lsat_1_v5_gn_3_81620	0.671786	0.366895	0	0
MYB	Lsat_1_v5_gn_3_81981	0.796282	0.325745	0	0
MYB	Lsat_1_v5_gn_3_82160	11.6111	69.1451	6.84047	1.55429
MYB	Lsat_1_v5_gn_3_82260	4.76648	25.3098	4.9449	3.7771
MYB	Lsat_1_v5_gn_3_8320	1.19682	0.872221	1.09672	0.458538
MYB	Lsat_1_v5_gn_3_85080	2.01236	1.08563	0.365215	0.47313
MYB	Lsat_1_v5_gn_3_88960	90.1395	216.038	181.905	168.089
MYB	Lsat_1_v5_gn_3_97081	0	0	0	0
MYB	Lsat_1_v5_gn_3_99620	2.70007	2.13957	0.344165	0.325801
MYB	Lsat_1_v5_gn_4_108080	0.973728	1.7236	1.22954	1.54822
MYB	Lsat_1_v5_gn_4_11141	1.43772	1.78327	2.26961	1.37064
MYB	Lsat_1_v5_gn_4_115760	4.96609	5.73463	9.69236	8.71567
MYB	Lsat_1_v5_gn_4_124580	4.0634	17.2125	20.6065	30.3859
MYB	Lsat_1_v5_gn_4_146281	0	0	0.0175097	0
MYB	Lsat_1_v5_gn_4_153581	44.1606	22.1145	21.0671	15.559
MYB	Lsat_1_v5_gn_4_155400	0	0	0	0
MYB	Lsat_1_v5_gn_4_16381	6.44816	0.235405	0	0.126334
MYB	Lsat_1_v5_gn_4_164101	42.034	118.554	70.7113	73.0037
MYB	Lsat_1_v5_gn_4_173000	0	0	0	0
MYB	Lsat_1_v5_gn_4_178141	5.76086	6.81142	1.31178	2.89919
MYB	Lsat_1_v5_gn_4_179120	0	0	0	0
MYB	Lsat_1_v5_gn_4_182961	0	0	0	0
MYB	Lsat_1_v5_gn_4_183160	0.0721247	0	0.040934	0
MYB	Lsat_1_v5_gn_4_183700	0	0	0	0
MYB	Lsat_1_v5_gn_4_27000	5.66587	5.39332	5.08847	3.68039
MYB	Lsat_1_v5_gn_4_31661	0.405056	0.875004	0.437357	0.62615
MYB	Lsat_1_v5_gn_4_46760	0	0	0	0
MYB	Lsat_1_v5_gn_4_56361	0	0.221334	0.341047	0.594273
MYB	Lsat_1_v5_gn_4_68960	0.17575	1.15863	0.373187	1.57266
MYB	Lsat_1_v5_gn_4_69641	0.662078	2.89437	1.20328	6.28348
MYB	Lsat_1_v5_gn_4_71501	18.1067	5.40275	9.21499	4.63685
MYB	Lsat_1_v5_gn_4_8620	5.5509	3.10725	2.82459	3.16264
MYB	Lsat_1_v5_gn_5_124061	0	0	0	0
MYB	Lsat_1_v5_gn_5_132420	5.03388	5.34147	3.39751	4.38703
MYB	Lsat_1_v5_gn_5_135881	0.046464	0.840236	1.14789	1.45602
MYB	Lsat_1_v5_gn_5_135961	0.501635	0.121707	0.131329	0.222597
MYB	Lsat_1_v5_gn_5_14080	26.5607	10.8661	15.0718	11.8191
MYB	Lsat_1_v5_gn_5_14920	0.0564017	0	0.00664533	0
MYB	Lsat_1_v5_gn_5_152520	10.4969	3.53479	3.4649	3.53235
MYB	Lsat_1_v5_gn_5_171741	0	0	0	0
MYB	Lsat_1_v5_gn_5_172401	27.4726	29.4417	23.7921	20.8678
MYB	Lsat_1_v5_gn_5_172501	63.6532	36.5976	25.0165	23.7031
MYB	Lsat_1_v5_gn_5_19541	0.916337	1.13693	0.241093	0.42268
MYB	Lsat_1_v5_gn_5_33260	7.62133	5.91698	8.72946	6.84147
MYB	Lsat_1_v5_gn_5_40441	0	0	0	0
MYB	Lsat_1_v5_gn_5_561	0	0.009395	0	0.01637
MYB	Lsat_1_v5_gn_5_75800	4.82228	3.95607	6.99589	4.01625
MYB	Lsat_1_v5_gn_6_114481	0	0	0.0253827	0
MYB	Lsat_1_v5_gn_6_117600	1.59846	0.306056	0.897259	2.03709
MYB	Lsat_1_v5_gn_6_19180	1.56029	2.91711	0.108279	0.0307483
MYB	Lsat_1_v5_gn_6_2121	3.04632	2.39324	3.1627	1.88995
MYB	Lsat_1_v5_gn_6_28280	0	0	0	0
MYB	Lsat_1_v5_gn_6_3861	0	0	0	0
MYB	Lsat_1_v5_gn_6_43981	0.039367	0.0361633	0	0.00996967
MYB	Lsat_1_v5_gn_6_47800	0.880117	0.475439	2.05671	0.740359
MYB	Lsat_1_v5_gn_6_53661	0.415308	0.238795	0.0889683	0.436297
MYB	Lsat_1_v5_gn_6_68381	0	0	0	0
MYB	Lsat_1_v5_gn_6_69741	5.40105	2.82048	4.62288	3.10762
MYB	Lsat_1_v5_gn_6_70301	1.50756	3.65112	2.02667	5.23555
MYB	Lsat_1_v5_gn_6_76300	25.2335	21.5995	17.602	17.8159
MYB	Lsat_1_v5_gn_6_82640	0.608529	0.988262	0.741627	4.93832
MYB	Lsat_1_v5_gn_6_86741	0.325041	1.22664	1.30497	0.991645
MYB	Lsat_1_v5_gn_6_90481	0.841747	0.385474	0.860965	0.462574
MYB	Lsat_1_v5_gn_7_20601	0.372233	1.01408	0.618254	1.45542
MYB	Lsat_1_v5_gn_7_35020	0.258042	0.226377	0.189156	0.199361
MYB	Lsat_1_v5_gn_7_38881	0.280419	0	0	0.038463
MYB	Lsat_1_v5_gn_7_5000	2.50691	9.94156	11.5064	13.9067
MYB	Lsat_1_v5_gn_7_70881	0.051895	0	0	0
MYB	Lsat_1_v5_gn_7_86500	12.6463	15.6414	11.2169	12.9165
MYB	Lsat_1_v5_gn_7_92401	0.0303677	0.00893	0.00863633	0
MYB	Lsat_1_v5_gn_8_131100	0.0105827	0.019999	0	0
MYB	Lsat_1_v5_gn_8_145621	5.63313	3.18536	3.33566	2.79143
MYB	Lsat_1_v5_gn_8_151061	0.095311	0.0180127	0.069252	0
MYB	Lsat_1_v5_gn_8_2880	42.9274	29.3353	30.3541	23.346
MYB	Lsat_1_v5_gn_8_40841	2.85997	2.04368	3.24253	3.39168
MYB	Lsat_1_v5_gn_8_43460	0	0.60887	0	0
MYB	Lsat_1_v5_gn_8_50280	0.0666807	0	0	0
MYB	Lsat_1_v5_gn_8_51261	0.535369	0.065523	0.0229407	0
MYB	Lsat_1_v5_gn_8_53780	6.51886	5.671	5.31159	3.55987
MYB	Lsat_1_v5_gn_8_67501	1.82818	0.593489	0.585938	0.765009
MYB	Lsat_1_v5_gn_8_71100	0	0	0	0
MYB	Lsat_1_v5_gn_8_72320	0.0368337	0.101829	0.103502	0.192324
MYB	Lsat_1_v5_gn_8_82801	8.5441	5.69033	6.68033	5.13866
MYB	Lsat_1_v5_gn_8_93080	0.353502	0.0533627	0.0287783	3.58991
MYB	Lsat_1_v5_gn_9_101841	0.0268353	0.870598	0.516267	0.306092
MYB	Lsat_1_v5_gn_9_111260	43.4475	112.616	55.5485	72.5134
MYB	Lsat_1_v5_gn_9_181	0.143523	1.98072	0.0385513	0
MYB	Lsat_1_v5_gn_9_19540	0	0	0	0
MYB	Lsat_1_v5_gn_9_22041	63.7463	14.3554	46.6287	31.6827
MYB	Lsat_1_v5_gn_9_34380	18.8521	11.1536	14.5262	12.083
MYB	Lsat_1_v5_gn_9_41660	0.0492867	0	0.008809	0
MYB	Lsat_1_v5_gn_9_55041	0	0	0	0
MYB	Lsat_1_v5_gn_9_55061	0	0	0	0
MYB	Lsat_1_v5_gn_9_59621	6.55613	2.78502	2.5392	1.44774
MYB	Lsat_1_v5_gn_9_79301	0.00594033	0	0	0
MYB	Lsat_1_v5_gn_9_8501	13.5127	44.0681	55.9964	77.452
MYB	Lsat_1_v5_gn_9_85801	13.275	20.4669	22.9209	21.8401
MYB	Lactuca_sativa_newGene_2016	13.7602	11.3925	8.84649	7.92786
MYB	Lactuca_sativa_newGene_2804	8.04798	6.11641	5.66331	4.49532
MYB	Lactuca_sativa_newGene_288	4.89989	17.565	43.575	28.8914
MYB	Lsat_1_v5_gn_0_33621	16.1661	14.0559	14.0343	10.9594
MYB	Lsat_1_v5_gn_1_113621	0.0208487	0.0387197	0	0.0297277
MYB	Lsat_1_v5_gn_1_41861	5.49475	4.64271	7.76803	6.67131
MYB	Lsat_1_v5_gn_1_53040	19.7663	20.1743	26.3234	28.8568
MYB	Lsat_1_v5_gn_2_105461	0	0	0	0
MYB	Lsat_1_v5_gn_2_109801	2.29142	9.90024	15.4781	12.4162
MYB	Lsat_1_v5_gn_2_113740	23.1438	13.9387	15.1239	12.269
MYB	Lsat_1_v5_gn_2_122581	6.39919	8.60694	5.81995	3.93021
MYB	Lsat_1_v5_gn_2_16481	0	0.055858	0.101306	0.0696603
MYB	Lsat_1_v5_gn_2_76341	3.10517	6.0436	1.84602	1.5734
MYB	Lsat_1_v5_gn_2_82680	6.90129	5.65954	3.70322	3.41033
MYB	Lsat_1_v5_gn_2_87561	0	0	0	0
MYB	Lsat_1_v5_gn_3_1641	19.04	11.2639	11.9446	10.4426
MYB	Lsat_1_v5_gn_3_50181	34.7455	7.153	8.66747	6.42544
MYB	Lsat_1_v5_gn_3_67100	14.0022	6.29589	8.97706	6.38842
MYB	Lsat_1_v5_gn_3_76680	0.438022	0.191052	0.000742333	0
MYB	Lsat_1_v5_gn_4_10800	0	0	0	0
MYB	Lsat_1_v5_gn_4_118501	68.9424	19.0919	10.7613	10.2383
MYB	Lsat_1_v5_gn_4_118620	0	0	0	0
MYB	Lsat_1_v5_gn_4_151240	5.59821	0.931634	2.06247	1.21234
MYB	Lsat_1_v5_gn_4_178761	0	0	0	0
MYB	Lsat_1_v5_gn_4_35660	12.8238	29.2103	23.6752	22.0517
MYB	Lsat_1_v5_gn_4_68300	0	0.139261	0	0
MYB	Lsat_1_v5_gn_4_74361	72.6798	64.438	100.945	61.7086
MYB	Lsat_1_v5_gn_4_8401	9.85072	6.31058	8.77089	4.13335
MYB	Lsat_1_v5_gn_4_93720	2.66803	2.48637	1.76941	1.38134
MYB	Lsat_1_v5_gn_4_93760	0	0	0	0
MYB	Lsat_1_v5_gn_4_93800	0	0	0	0
MYB	Lsat_1_v5_gn_4_94681	0	0	0	0
MYB	Lsat_1_v5_gn_4_94800	0	0	0	0
MYB	Lsat_1_v5_gn_4_97521	36.0385	9.63715	20.1541	21.2909
MYB	Lsat_1_v5_gn_5_113860	25.2125	29.0627	21.814	21.3533
MYB	Lsat_1_v5_gn_5_117861	7.748	26.7619	0.534904	1.0921
MYB	Lsat_1_v5_gn_5_121960	13.1944	15.6283	12.5216	12.9569
MYB	Lsat_1_v5_gn_5_124001	0	0	0	0
MYB	Lsat_1_v5_gn_5_135921	15.4364	12.1965	9.97911	8.05411
MYB	Lsat_1_v5_gn_5_143181	23.5544	17.7527	13.7172	16.4583
MYB	Lsat_1_v5_gn_5_145621	0.840612	0.636776	0.470212	0.754487
MYB	Lsat_1_v5_gn_5_167580	22.0556	4.46661	8.66786	3.84886
MYB	Lsat_1_v5_gn_5_17481	56.8409	49.9595	53.5715	46.916
MYB	Lsat_1_v5_gn_5_17560	0	0	0.029304	0
MYB	Lsat_1_v5_gn_5_187701	32.2066	34.8377	34.865	29.2173
MYB	Lsat_1_v5_gn_5_78160	0	0	0	0
MYB	Lsat_1_v5_gn_6_104940	1.60375	0.990053	0.605865	0.437848
MYB	Lsat_1_v5_gn_6_15141	7.94161	6.86495	7.64396	10.0184
MYB	Lsat_1_v5_gn_6_93401	22.0305	18.2558	17.9803	12.8305
MYB	Lsat_1_v5_gn_7_104201	9.47112	8.40071	8.50164	8.17282
MYB	Lsat_1_v5_gn_7_51901	0.464836	0.00787333	0	0.0237527
MYB	Lsat_1_v5_gn_7_55061	0.0191053	0	0	0
MYB	Lsat_1_v5_gn_7_91221	0.0958557	0.275163	0.113134	0.063621
MYB	Lsat_1_v5_gn_8_50241	0	0	0	0
MYB	Lsat_1_v5_gn_8_78460	56.8302	15.5257	74.5289	15.8419
MYB	Lsat_1_v5_gn_8_8701	3.98125	4.00179	3.77318	3.20364
MYB	Lsat_1_v5_gn_8_9840	0	0	0	0
MYB	Lsat_1_v5_gn_9_103221	3.35406	5.0272	4.88648	3.3191
MYB	Lsat_1_v5_gn_9_26680	18.3815	11.494	11.6717	9.31221
MYB	Lsat_1_v5_gn_9_56161	0	0	0	0
MYB	Lsat_1_v5_gn_9_56661	8.78069	14.1872	14.1074	15.6686
MYB	Lsat_1_v5_gn_9_61420	43.1017	22.2753	16.1723	22.5093
MYB	Lsat_1_v5_gn_9_74001	15.1701	11.4643	11.8923	9.89661
MYB	Lsat_1_v5_gn_9_86120	0	0	0	0
MYB	Lsat_1_v5_gn_9_86960	12.2281	9.70658	10.582	8.41469
AP2/ERF	Lsat_1_v5_gn_1_38141	3.76309	0.75686	0.847054	0.333751
AP2/ERF	Lsat_1_v5_gn_1_53680	0	0	0	0
AP2/ERF	Lsat_1_v5_gn_2_109741	10.7564	19.02	21.3226	17.1729
AP2/ERF	Lsat_1_v5_gn_2_116160	0.530715	1.4917	1.05008	0.405818
AP2/ERF	Lsat_1_v5_gn_2_63321	0.663593	0.245616	0.10994	0.211895
AP2/ERF	Lsat_1_v5_gn_2_70201	0.712206	0.118824	0	0.0775363
AP2/ERF	Lsat_1_v5_gn_2_85920	24.1017	22.2606	11.9774	6.98078
AP2/ERF	Lsat_1_v5_gn_2_88660	0.200316	0.723288	0.337181	0.093494
AP2/ERF	Lsat_1_v5_gn_3_63001	7.76717	3.54612	3.27465	3.43969
AP2/ERF	Lsat_1_v5_gn_3_85620	23.4636	12.3941	5.97724	4.4842
AP2/ERF	Lsat_1_v5_gn_3_89681	33.7702	15.1536	11.6297	6.24908
AP2/ERF	Lsat_1_v5_gn_4_159600	9.46099	2.97947	1.98856	1.0192
AP2/ERF	Lsat_1_v5_gn_4_165341	13.6096	23.7699	16.1486	7.49794
AP2/ERF	Lsat_1_v5_gn_4_84981	4.08352	4.05379	2.33451	1.14479
AP2/ERF	Lsat_1_v5_gn_6_23441	0.0126207	0	0	0
AP2/ERF	Lsat_1_v5_gn_6_29600	3.7129	0.811007	0.68533	0.33249
AP2/ERF	Lsat_1_v5_gn_6_3561	0	0.0289363	0	0.022509
AP2/ERF	Lsat_1_v5_gn_6_48361	0.00899667	0	0	0
AP2/ERF	Lsat_1_v5_gn_7_53580	2.92633	5.53729	3.63683	4.14339
AP2/ERF	Lsat_1_v5_gn_8_64920	0	0	0	0
AP2/ERF	Lsat_1_v5_gn_9_80800	19.8834	34.5245	31.804	19.4679
AP2/ERF	Lactuca_sativa_newGene_918	13.744	1.0219	2.31314	1.78986
AP2/ERF	Lsat_1_v5_gn_0_300	4.10312	1.35544	1.15894	1.98527
AP2/ERF	Lsat_1_v5_gn_0_41681	352.748	196.325	236.069	193.199
AP2/ERF	Lsat_1_v5_gn_0_43220	0	0	0	0
AP2/ERF	Lsat_1_v5_gn_1_108440	0	0	0	0
AP2/ERF	Lsat_1_v5_gn_1_125981	11.78	69.6049	39.2818	53.6103
AP2/ERF	Lsat_1_v5_gn_1_15641	1.2455	0.124109	0.145967	0.140477
AP2/ERF	Lsat_1_v5_gn_1_16621	0.0235437	0.456519	0.503988	1.63372
AP2/ERF	Lsat_1_v5_gn_1_21881	20.0564	9.51904	24.3978	25.1889
AP2/ERF	Lsat_1_v5_gn_1_31620	0.01159	0	0.00995233	0.008061
AP2/ERF	Lsat_1_v5_gn_1_34721	5.56266	8.03882	15.3803	11.492
AP2/ERF	Lsat_1_v5_gn_1_38561	16.479	26.5735	36.1429	31.6048
AP2/ERF	Lsat_1_v5_gn_1_41980	0.0323983	0	0	0
AP2/ERF	Lsat_1_v5_gn_1_4460	57.1512	133.967	150.583	122.668
AP2/ERF	Lsat_1_v5_gn_1_44740	0.489263	2.24114	0	0.0168073
AP2/ERF	Lsat_1_v5_gn_1_46781	1.49977	0.357715	0.157252	0.0501583
AP2/ERF	Lsat_1_v5_gn_1_51221	0.384919	0.0443397	1.23373	2.8369
AP2/ERF	Lsat_1_v5_gn_1_5340	0.413623	1.03567	0.50653	14.5304
AP2/ERF	Lsat_1_v5_gn_1_71921	0.155307	0.0257833	0.0256983	0
AP2/ERF	Lsat_1_v5_gn_2_107780	7.63377	3.59986	1.23024	0.496677
AP2/ERF	Lsat_1_v5_gn_2_107800	0.107987	0.289801	0.22629	0.282463
AP2/ERF	Lsat_1_v5_gn_2_107840	0.134102	0	0	0.0783393
AP2/ERF	Lsat_1_v5_gn_2_109761	0.0661057	0.922931	1.09658	4.21134
AP2/ERF	Lsat_1_v5_gn_2_126980	82.9241	28.7492	24.2872	11.1926
AP2/ERF	Lsat_1_v5_gn_2_128021	36.236	56.3116	60.6518	29.7604
AP2/ERF	Lsat_1_v5_gn_2_130641	27.7933	157.179	91.4521	137.372
AP2/ERF	Lsat_1_v5_gn_2_130761	0.322029	1.99159	2.68534	17.793
AP2/ERF	Lsat_1_v5_gn_2_130781	2.25459	22.8933	9.68286	51.9467
AP2/ERF	Lsat_1_v5_gn_2_130801	1.92421	17.3765	16.6003	80.531
AP2/ERF	Lsat_1_v5_gn_2_130880	0.696588	12.1515	7.51494	32.242
AP2/ERF	Lsat_1_v5_gn_2_133380	0.231892	3.07782	2.25349	10.1451
AP2/ERF	Lsat_1_v5_gn_2_134301	1.46158	4.9444	5.26872	14.5317
AP2/ERF	Lsat_1_v5_gn_2_20801	0.663125	0.406344	2.63566	7.66968
AP2/ERF	Lsat_1_v5_gn_2_26261	0	0.154407	0	0.02196
AP2/ERF	Lsat_1_v5_gn_2_45101	0.19577	0.079559	0.00744533	0.519494
AP2/ERF	Lsat_1_v5_gn_2_70481	0	0	0	0
AP2/ERF	Lsat_1_v5_gn_2_85720	2.79859	4.16462	2.4883	2.50365
AP2/ERF	Lsat_1_v5_gn_2_89300	0.0810013	0.0298257	0.135714	0.0373307
AP2/ERF	Lsat_1_v5_gn_3_10000	0.7946	0.422329	0.191156	0.279079
AP2/ERF	Lsat_1_v5_gn_3_10461	1.86926	5.70332	3.27175	6.07408
AP2/ERF	Lsat_1_v5_gn_3_121961	0.427845	0.0200913	0	0.0190783
AP2/ERF	Lsat_1_v5_gn_3_126981	0	0.0204983	0.0110363	0.0175123
AP2/ERF	Lsat_1_v5_gn_3_127281	0.446299	0	0	0.0115667
AP2/ERF	Lsat_1_v5_gn_3_127321	0.451735	0.317694	0.541326	0.091379
AP2/ERF	Lsat_1_v5_gn_3_127401	4.8365	3.37723	4.65353	3.44713
AP2/ERF	Lsat_1_v5_gn_3_129940	1.76778	7.45754	1.89774	0.682425
AP2/ERF	Lsat_1_v5_gn_3_1301	0.741697	0.234671	0.499172	0.701681
AP2/ERF	Lsat_1_v5_gn_3_131581	0.227742	0.451382	0.323181	0.237281
AP2/ERF	Lsat_1_v5_gn_3_21780	368.556	36.6044	76.6555	56.2746
AP2/ERF	Lsat_1_v5_gn_3_24201	0.026928	0.956719	0.266371	1.24586
AP2/ERF	Lsat_1_v5_gn_3_32080	8.37784	1.25608	5.26998	3.50578
AP2/ERF	Lsat_1_v5_gn_3_5680	1.8968	63.9774	47.3103	161.404
AP2/ERF	Lsat_1_v5_gn_3_5800	0.114908	9.3802	9.80519	14.5002
AP2/ERF	Lsat_1_v5_gn_3_59401	12.0977	5.56297	5.68482	3.19939
AP2/ERF	Lsat_1_v5_gn_3_66820	4.92829	2.25153	1.24001	1.3345
AP2/ERF	Lsat_1_v5_gn_3_89921	16.4493	8.46413	10.6771	10.6178
AP2/ERF	Lsat_1_v5_gn_4_100980	0	0.116943	0.0929913	0.021992
AP2/ERF	Lsat_1_v5_gn_4_127080	5.35527	1.8128	1.10533	2.22498
AP2/ERF	Lsat_1_v5_gn_4_133341	0.157145	14.73	5.62087	35.1141
AP2/ERF	Lsat_1_v5_gn_4_138540	0.158173	1.29003	1.1622	25.8862
AP2/ERF	Lsat_1_v5_gn_4_164580	6.94599	5.45251	4.01619	4.15815
AP2/ERF	Lsat_1_v5_gn_4_166540	0	9.7004	1.04445	5.36818
AP2/ERF	Lsat_1_v5_gn_4_166580	0	8.74066	1.09491	5.72088
AP2/ERF	Lsat_1_v5_gn_4_166600	0.125308	17.5572	8.6034	15.2062
AP2/ERF	Lsat_1_v5_gn_4_166640	0.003989	0	0.0274947	0
AP2/ERF	Lsat_1_v5_gn_4_166720	0.0404743	0.012194	0	0.044854
AP2/ERF	Lsat_1_v5_gn_4_166840	0	0	0	0.0670803
AP2/ERF	Lsat_1_v5_gn_4_169860	0	0	0	0
AP2/ERF	Lsat_1_v5_gn_4_17901	7.61514	12.7133	9.67718	8.38592
AP2/ERF	Lsat_1_v5_gn_4_22701	0.31211	0.109281	0.184378	0.150026
AP2/ERF	Lsat_1_v5_gn_4_40241	1.61335	0.0759263	0.013008	0
AP2/ERF	Lsat_1_v5_gn_4_40760	0	0	0	0
AP2/ERF	Lsat_1_v5_gn_4_45781	1.29001	3.61924	8.11297	7.37386
AP2/ERF	Lsat_1_v5_gn_4_46601	3.76413	0.063365	0.0576277	1.67472
AP2/ERF	Lsat_1_v5_gn_4_51260	0	0	0	0
AP2/ERF	Lsat_1_v5_gn_4_51301	6.71038	0.302292	0.0209923	0.120854
AP2/ERF	Lsat_1_v5_gn_4_52000	112.617	207.751	166.519	188.236
AP2/ERF	Lsat_1_v5_gn_4_52080	2.10568	11.5756	8.30593	11.6748
AP2/ERF	Lsat_1_v5_gn_4_64461	24.7479	91.4898	101.619	130.49
AP2/ERF	Lsat_1_v5_gn_4_88920	6.91052	10.605	19.0318	6.66368
AP2/ERF	Lsat_1_v5_gn_5_10080	0.782069	0.0194327	0.0279463	0
AP2/ERF	Lsat_1_v5_gn_5_108800	0.261232	3.95311	5.13148	50.854
AP2/ERF	Lsat_1_v5_gn_5_123361	20.6215	15.4094	17.7681	14.6395
AP2/ERF	Lsat_1_v5_gn_5_128280	1.86741	2.73318	1.77213	3.96583
AP2/ERF	Lsat_1_v5_gn_5_131240	1.22504	0.773475	1.12949	2.17534
AP2/ERF	Lsat_1_v5_gn_5_134561	1.95816	1.69258	0.238146	0.0987467
AP2/ERF	Lsat_1_v5_gn_5_136680	46.8259	34.3286	41.2632	37.6465
AP2/ERF	Lsat_1_v5_gn_5_139440	6.93003	125.74	122.833	102.236
AP2/ERF	Lsat_1_v5_gn_5_173701	4.66427	0.639481	0.56859	0.248402
AP2/ERF	Lsat_1_v5_gn_5_177360	25.4432	17.9996	15.6585	11.6025
AP2/ERF	Lsat_1_v5_gn_5_180841	4.77379	3.93454	4.36557	3.2582
AP2/ERF	Lsat_1_v5_gn_5_182281	2.3313	2.01405	2.56553	10.7505
AP2/ERF	Lsat_1_v5_gn_5_182420	11.5904	0.536991	1.37998	1.02137
AP2/ERF	Lsat_1_v5_gn_5_186580	0.99702	8.49692	6.69276	16.7331
AP2/ERF	Lsat_1_v5_gn_5_22521	0	0	0	0
AP2/ERF	Lsat_1_v5_gn_5_25561	0	0	0	0.0136633
AP2/ERF	Lsat_1_v5_gn_5_28320	1.06727	0.128107	0.0111597	0
AP2/ERF	Lsat_1_v5_gn_5_29081	14.8793	2.77908	2.29794	0.878931
AP2/ERF	Lsat_1_v5_gn_5_30320	0.514258	0.725379	0.142859	0.040674
AP2/ERF	Lsat_1_v5_gn_5_31460	0.161144	0.611395	0.237624	0.174958
AP2/ERF	Lsat_1_v5_gn_5_64721	0.0759503	0.078328	0.016749	0.11741
AP2/ERF	Lsat_1_v5_gn_5_7841	0	0	0	0
AP2/ERF	Lsat_1_v5_gn_5_92420	0	0	0	0
AP2/ERF	Lsat_1_v5_gn_6_103940	18.1653	72.2263	102.089	92.847
AP2/ERF	Lsat_1_v5_gn_6_106321	0.246075	0.226708	0.0582693	0
AP2/ERF	Lsat_1_v5_gn_6_11860	2.37903	0.644375	0.215051	0.277541
AP2/ERF	Lsat_1_v5_gn_6_12261	3.29224	62.5804	29.9536	107.486
AP2/ERF	Lsat_1_v5_gn_6_13081	0.370123	12.7517	6.24295	54.9711
AP2/ERF	Lsat_1_v5_gn_6_13121	4.17849	17.9347	8.13763	48.5995
AP2/ERF	Lsat_1_v5_gn_6_13161	0.990999	4.65674	5.26864	12.0523
AP2/ERF	Lsat_1_v5_gn_6_13181	0	0.642342	0.458042	2.3762
AP2/ERF	Lsat_1_v5_gn_6_16141	0.592944	0	0	0.0129023
AP2/ERF	Lsat_1_v5_gn_6_19600	8.59072	1.43216	4.89077	1.58222
AP2/ERF	Lsat_1_v5_gn_6_41680	0	3.11905	0.823569	3.7475
AP2/ERF	Lsat_1_v5_gn_6_52740	0.270359	0.112128	0.087661	0.134353
AP2/ERF	Lsat_1_v5_gn_6_60300	0.0539127	0.0529393	0.136932	0
AP2/ERF	Lsat_1_v5_gn_6_76081	13.426	10.3083	15.1849	11.8728
AP2/ERF	Lsat_1_v5_gn_6_8021	0	0	0	0
AP2/ERF	Lsat_1_v5_gn_6_81041	2.65612	27.9771	12.0748	15.7186
AP2/ERF	Lsat_1_v5_gn_6_84541	0.669021	0.322431	0.136442	0.153147
AP2/ERF	Lsat_1_v5_gn_6_85941	4.74816	1.39742	1.84075	2.03402
AP2/ERF	Lsat_1_v5_gn_6_92761	2.1142	8.49881	2.19801	3.03592
AP2/ERF	Lsat_1_v5_gn_6_92840	57.0624	82.4466	46.1374	30.672
AP2/ERF	Lsat_1_v5_gn_6_92860	1.91645	0.482913	0.950959	0.941301
AP2/ERF	Lsat_1_v5_gn_6_92900	9.1163	12.6725	4.60825	3.0236
AP2/ERF	Lsat_1_v5_gn_6_92940	5.83062	8.6668	4.23299	5.76195
AP2/ERF	Lsat_1_v5_gn_7_104600	1.7046	6.9672	4.70074	3.33717
AP2/ERF	Lsat_1_v5_gn_7_105441	0.0249817	0.0148007	0.0278267	0
AP2/ERF	Lsat_1_v5_gn_7_11381	20.9773	6.87979	7.83621	7.70482
AP2/ERF	Lsat_1_v5_gn_7_114601	12.4896	8.43934	8.72972	6.34308
AP2/ERF	Lsat_1_v5_gn_7_1840	0.795312	1.22348	0.942137	0.605141
AP2/ERF	Lsat_1_v5_gn_7_20840	2.93795	1.47624	1.95008	1.05912
AP2/ERF	Lsat_1_v5_gn_7_22540	28.4523	84.331	66.6413	45.4812
AP2/ERF	Lsat_1_v5_gn_7_35201	0.490667	83.2735	42.818	128.408
AP2/ERF	Lsat_1_v5_gn_7_35740	1.68163	0.099078	0.087551	0.196762
AP2/ERF	Lsat_1_v5_gn_7_35780	0.397441	0.0852007	0.22278	0.0108527
AP2/ERF	Lsat_1_v5_gn_7_35800	0	0.053547	0	0
AP2/ERF	Lsat_1_v5_gn_7_39881	4.60477	120.008	91.6931	201.212
AP2/ERF	Lsat_1_v5_gn_7_39941	19.7599	243.752	176.788	334.423
AP2/ERF	Lsat_1_v5_gn_7_50600	0	0	0	0
AP2/ERF	Lsat_1_v5_gn_7_54921	5.18404	2.45428	1.79201	0.963737
AP2/ERF	Lsat_1_v5_gn_7_5961	0.00783033	0.0236107	0.052547	0.007265
AP2/ERF	Lsat_1_v5_gn_8_117021	0.0537713	0	0	0
AP2/ERF	Lsat_1_v5_gn_8_13141	0.734362	23.1989	19.953	28.3935
AP2/ERF	Lsat_1_v5_gn_8_132101	0.153291	14.9708	14.8734	13.3211
AP2/ERF	Lsat_1_v5_gn_8_135220	47.4643	184.496	131.92	157.868
AP2/ERF	Lsat_1_v5_gn_8_153360	0	0	0.014261	0
AP2/ERF	Lsat_1_v5_gn_8_164520	50.1279	55.0208	42.5215	49.2857
AP2/ERF	Lsat_1_v5_gn_8_18040	11.1016	7.55128	6.51919	3.47623
AP2/ERF	Lsat_1_v5_gn_8_39441	0.540241	0	0.013581	0.0235033
AP2/ERF	Lsat_1_v5_gn_8_39461	0	0	0	0
AP2/ERF	Lsat_1_v5_gn_8_40020	36.8403	28.2881	35.5993	34.5337
AP2/ERF	Lsat_1_v5_gn_8_49140	0	0	0	0
AP2/ERF	Lsat_1_v5_gn_8_5781	1.05201	1.38526	1.72418	4.15608
AP2/ERF	Lsat_1_v5_gn_8_78400	7.73296	7.71604	4.44462	1.91849
AP2/ERF	Lsat_1_v5_gn_8_85941	0	0	0.0268757	0.0383497
AP2/ERF	Lsat_1_v5_gn_8_85961	0.122815	0.978168	1.66843	7.17157
AP2/ERF	Lsat_1_v5_gn_8_89300	3.87238	2.72538	1.85707	4.41395
AP2/ERF	Lsat_1_v5_gn_8_92820	0.255456	0	0.0260727	0.147713
AP2/ERF	Lsat_1_v5_gn_8_96580	17.0912	12.1244	13.0238	11.3662
AP2/ERF	Lsat_1_v5_gn_8_9741	26.8271	5.3762	7.17575	4.49515
AP2/ERF	Lsat_1_v5_gn_8_99561	25.7448	57.6126	37.1391	45.8534
AP2/ERF	Lsat_1_v5_gn_9_105221	30.2738	19.6093	25.054	18.1574
AP2/ERF	Lsat_1_v5_gn_9_109681	0	0	0	0
AP2/ERF	Lsat_1_v5_gn_9_110040	13.9248	287.174	147.265	234.181
AP2/ERF	Lsat_1_v5_gn_9_114680	0.0443083	1.23859	0.062059	0
AP2/ERF	Lsat_1_v5_gn_9_114720	7.83906	51.5298	48.422	11.7717
AP2/ERF	Lsat_1_v5_gn_9_13601	24.5729	23.7324	14.9338	7.96849
AP2/ERF	Lsat_1_v5_gn_9_20420	6.94803	9.19272	6.8696	3.43205
AP2/ERF	Lsat_1_v5_gn_9_27440	0.201187	0.110634	0	0
AP2/ERF	Lsat_1_v5_gn_9_29401	32.8724	18.7579	15.9229	12.7944
AP2/ERF	Lsat_1_v5_gn_9_30600	18.7441	23.9947	25.8901	20.4841
AP2/ERF	Lsat_1_v5_gn_9_41960	0.319784	0.139529	0.0940527	8.46559
AP2/ERF	Lsat_1_v5_gn_9_43700	132.425	120.197	194.426	119.602
AP2/ERF	Lsat_1_v5_gn_9_44381	0	0	0	0
AP2/ERF	Lsat_1_v5_gn_9_50660	56.1336	33.5252	15.6506	12.2361
AP2/ERF	Lsat_1_v5_gn_9_50700	72.0675	97.5029	90.8674	69.1159
AP2/ERF	Lsat_1_v5_gn_9_53921	8.09768	191.842	65.5397	194.292
AP2/ERF	Lsat_1_v5_gn_9_53960	8.23869	188.145	72.7677	126.745
AP2/ERF	Lsat_1_v5_gn_9_54101	0.182283	88.9279	32.3291	39.1279
AP2/ERF	Lsat_1_v5_gn_9_54680	1.68594	86.5253	28.1875	23.0173
AP2/ERF	Lsat_1_v5_gn_9_54780	2.11603	64.7864	36.98	23.8811
AP2/ERF	Lsat_1_v5_gn_9_54860	0.0274273	7.30318	6.278	3.09214
AP2/ERF	Lsat_1_v5_gn_9_54880	0.022813	3.41905	2.47141	1.16479
AP2/ERF	Lsat_1_v5_gn_9_54900	0.0314367	1.07145	1.04273	0.49285
AP2/ERF	Lsat_1_v5_gn_9_60760	0.0334453	0.158256	0	0.0395
AP2/ERF	Lsat_1_v5_gn_9_62421	0	0	0	0
AP2/ERF	Lsat_1_v5_gn_9_8601	1.11835	0.102568	0.126656	0.140477
AP2/ERF	Lsat_1_v5_gn_9_8621	0.669102	0.04935	0.034112	0.0271097
AP2/ERF	Lsat_1_v5_gn_9_93200	29.1674	25.3418	25.9499	27.7695
AP2/ERF	Lsat_1_v5_gn_3_30661	0	0.154712	0.063241	0.0732523
AP2/ERF	Lsat_1_v5_gn_4_19860	49.5982	35.6544	23.046	18.9273
AP2/ERF	Lsat_1_v5_gn_8_38520	30.7864	80.6832	45.9451	43.2577
