# Supplementary material for: Combined analysis of the transcriptome and metabolome provides insights into the fleshy stem expansion mechanism in stem lettuce
Source: Front Plant Sci. 2022 Dec 15;13:1101199. doi: 10.3389/fpls.2022.1101199 (PMC9798005; doi:10.3389/fpls.2022.1101199)
Supplement: Supplementary file 4 [file Table_4.xlsx]

## Sheet: Sheet1
Table S4 Enrichment pathways analysis identified by transcriptome and metabolome at different fleshy stem expansion stages in lettuce
Comparison pairs	Description	GeneRatio	BgRatio	enrich factor	p value	q value	Metabolite Ratio	BgRatio	enrich factor	p value	q value
S1vsS2	Starch and sucrose metabolism	0.079	0.0456	1.73	4.90661e-12	2.91814e-10	2.68%	1.72%	1.56	0.290309	0.975296
	Zeatin biosynthesis	0.0154	0.0075	2.04	0.000125782	0.00249358	1.79%	1.72%	1.04	0.638105	0.975296
	Sesquiterpenoid and triterpenoid biosynthesis	0.0132	0.0068	1.95	0.000754805	0.00997578	0.89%	0.69%	1.3	0.622443	0.975296
	Phenylpropanoid biosynthesis	0.0406	0.0303	1.34	0.00434379	0.0469711	6.25%	7.22%	0.87	0.766716	0.975296
	Glycerophospholipid metabolism	0.022	0.0197	1.11	0.254569	0.922073	8.04%	4.12%	1.95	0.0100772	0.85656
	Porphyrin and chlorophyll metabolism	0.0104	0.0064	1.64	0.0184891	0.169171	0.89%	1.37%	0.65	0.858688	0.989563
	Carbon metabolism	0.0274	0.0429	0.64	0.999921	0.922073	8.04%	4.47%	1.8	0.0220601	0.937556
	Biosynthesis of unsaturated fatty acids	0.0082	0.0049	1.69	0.026145	0.222134	0.89%	1.72%	0.52	0.913834	0.989563
	Terpenoid backbone biosynthesis	0.0137	0.0095	1.44	0.0352461	0.279496	0.89%	0.69%	1.3	0.622443	0.975296
	Cysteine and methionine metabolism	0.011	0.0155	0.71	0.96763	0.922073	7.14%	4.12%	1.73	0.0422238	0.975296
S1vsS3	Plant hormone signal transduction	0.1031	0.0709	1.45	1.45671e-08	5.77572e-07	0.84%	1.72%	0.49	0.929578	0.991936
	Starch and sucrose metabolism	0.0687	0.0456	1.51	5.8588e-07	1.39378e-05	0.84%	1.72%	0.49	0.929578	0.991936
	Phenylpropanoid biosynthesis	0.0462	0.0303	1.53	2.63298e-05	0.000521978	5.04%	7.22%	0.7	0.925255	0.991936
	Zeatin biosynthesis	0.0156	0.0075	2.06	7.09995e-05	0.00120646	0.84%	1.72%	0.49	0.929578	0.991936
	Glycerophospholipid metabolism	0.0231	0.0197	1.17	0.149122	0.535629	9.24%	4.12%	2.24	0.000311948	0.0255797
	Biosynthesis of unsaturated fatty acids	0.0107	0.0049	2.2	0.000350167	0.00520643	0.84%	1.72%	0.49	0.929578	0.991936
	Sesquiterpenoid and triterpenoid biosynthesis	0.0124	0.0068	1.83	0.00239906	0.0317069	0.84%	0.69%	1.22	0.651475	0.991936
	Amino sugar and nucleotide sugar metabolism	0.0301	0.0211	1.43	0.00319126	0.0345084	2.52%	2.06%	1.22	0.474361	0.985622
	Flavonoid biosynthesis	0.0156	0.0106	1.47	0.0197832	0.161261	1.68%	1.37%	1.22	0.540853	0.985622
	Ubiquinone and other terpenoid-quinone biosynthesis	0.0107	0.0068	1.59	0.0216918	0.161261	2.52%	3.44%	0.73	0.851134	0.991936
S1vsS4	Plant hormone signal transduction	0.0991	0.0709	1.4	1.21368e-08	3.57717e-07	0.79%	1.72%	0.46	0.944661	0.997143
	Starch and sucrose metabolism	0.068	0.0456	1.49	3.74694e-08	8.8349e-07	1.57%	1.72%	0.92	0.725036	0.997143
	Phenylpropanoid biosynthesis	0.0446	0.0303	1.47	1.46565e-05	0.000287987	4.72%	7.22%	0.65	0.955567	0.997143
	Amino sugar and nucleotide sugar metabolism	0.0312	0.0211	1.48	0.000237393	0.0039982	3.15%	2.06%	1.53	0.231029	0.997143
	Glycerophospholipid metabolism	0.0199	0.0197	1.01	0.497514	0.906883	8.66%	4.12%	2.1	0.000631477	0.0517811
	Zeatin biosynthesis	0.0121	0.0075	1.61	0.00548531	0.0704523	0.79%	1.72%	0.46	0.944661	0.997143
	Biosynthesis of various secondary metabolites - part 2	0.0013	0.0002	5.51	0.00597586	0.0704523	2.36%	3.78%	0.62	0.926506	0.997143
	Stilbenoid, diarylheptanoid and gingerol biosynthesis	0.0108	0.0068	1.6	0.00876972	0.0887713	0.79%	2.41%	0.33	0.982944	0.997143
	Fatty acid elongation	0.0087	0.0052	1.67	0.0111693	0.0914815	0.79%	1.03%	0.76	0.822435	0.997143
	Biosynthesis of unsaturated fatty acids	0.0082	0.0049	1.69	0.0116394	0.0914815	0.79%	1.72%	0.46	0.944661	0.997143
S2vsS3	Fatty acid elongation	0.0259	0.0052	5	2.45308e-08	2.29815e-06	4.65%	1.03%	4.51	0.0581298	0.447385
	Phenylpropanoid biosynthesis	0.0655	0.0303	2.17	1.38382e-06	6.48212e-05	2.33%	7.22%	0.32	0.96949	0.952481
	ABC transporters	0.0381	0.0149	2.55	1.49109e-05	0.000465638	11.63%	12.37%	0.94	0.644788	0.808692
	Flavonoid biosynthesis	0.0244	0.0106	2.3	0.0015673	0.0234527	2.33%	3.78%	0.62	0.833456	0.86193
	Pantothenate and CoA biosynthesis	0.0015	0.0052	0.29	0.969877	0.875553	9.3%	1.72%	5.41	0.00187918	0.0665282
	Lysine degradation	0.003	0.0061	0.5	0.912587	0.875553	11.63%	2.75%	4.23	0.00225721	0.0665282
	Galactose metabolism	0.0274	0.0137	2.01	0.00378879	0.0343511	4.65%	3.09%	1.5	0.393868	0.644931
	Photosynthesis	0.0274	0.0142	1.93	0.00572657	0.0447075	2.33%	0.69%	3.38	0.274132	0.52127
	Plant hormone signal transduction	0.0899	0.0709	1.27	0.0336128	0.223171	2.33%	1.72%	1.35	0.553135	0.741042
	Biosynthesis of unsaturated fatty acids	0.0107	0.0049	2.19	0.039546	0.223171	2.33%	1.72%	1.35	0.553135	0.741042
S2vsS4	Phenylpropanoid biosynthesis	0.0617	0.0303	2.04	1.71945e-07	9.77371e-06	1.92%	7.22%	0.27	0.986428	0.895125
	Flavonoid biosynthesis	0.0281	0.0106	2.65	3.78727e-06	0.000143518	9.62%	3.78%	2.54	0.0296717	0.206747
	ABC transporters	0.0292	0.0149	1.96	0.000585241	0.00950466	15.38%	12.37%	1.24	0.300266	0.612712
	Glycerophospholipid metabolism	0.0173	0.0197	0.88	0.74241	0.92426	13.46%	4.12%	3.26	0.00153996	0.0637002
	Glycine, serine and threonine metabolism	0.0022	0.012	0.18	0.99988	0.92426	9.62%	2.41%	4	0.00242061	0.0637002
	Starch and sucrose metabolism	0.0639	0.0456	1.4	0.00505917	0.0575148	1.92%	1.72%	1.12	0.629114	0.719811
	Valine, leucine and isoleucine biosynthesis	0.0011	0.0024	0.46	0.896088	0.92426	5.77%	1.03%	5.6	0.00543694	0.0953849
	Histidine metabolism	0.0054	0.0039	1.38	0.296437	0.886848	9.62%	3.09%	3.11	0.0108334	0.142545
	Cyanoamino acid metabolism	0.0119	0.0103	1.16	0.353442	0.92426	7.69%	2.41%	3.2	0.0210782	0.206747
	Valine, leucine and isoleucine degradation	0.0097	0.0097	1.01	0.54053	0.92426	3.85%	0.69%	5.6	0.0314255	0.206747
S3vsS4	Biosynthesis of unsaturated fatty acids	0.0199	0.0049	4.08	0.00014393	0.00356037	5%	1.72%	2.91	0.301336	0.481263
	Stilbenoid, diarylheptanoid and gingerol biosynthesis	0.0199	0.0068	2.94	0.0020362	0.0325584	5%	2.41%	2.08	0.395794	0.539163
	Glycerolipid metabolism	0.0159	0.0177	0.9	0.670139	0.891418	10%	1.03%	9.7	0.0129478	0.353691
	Zeatin biosynthesis	0.0179	0.0075	2.37	0.0135392	0.133967	5%	1.72%	2.91	0.301336	0.481263
	Flavonoid biosynthesis	0.0219	0.0106	2.06	0.0180434	0.162304	15%	3.78%	3.97	0.0322324	0.353691
	Phosphatidylinositol signaling system	0.0278	0.0156	1.78	0.0265892	0.187924	5%	0.34%	14.55	0.0687285	0.353691
	Fatty acid metabolism	0.0278	0.0166	1.68	0.0406604	0.236661	5%	1.37%	3.64	0.249002	0.481263
	Arachidonic acid metabolism	0.006	0.0057	1.05	0.546017	0.891418	15%	4.47%	3.36	0.0510553	0.353691
	C5-Branched dibasic acid metabolism	0.002	0.0012	1.69	0.454092	0.891418	10%	2.06%	4.85	0.0570483	0.353691
	Propanoate metabolism	0.006	0.0068	0.88	0.666504	0.891418	5%	0.34%	14.55	0.0687285	0.353691
