# Supplementary material for: Combined analysis of the transcriptome and metabolome provides insights into the fleshy stem expansion mechanism in stem lettuce
Source: Front Plant Sci. 2022 Dec 15;13:1101199. doi: 10.3389/fpls.2022.1101199 (PMC9798005; doi:10.3389/fpls.2022.1101199)
Supplement: Supplementary file 5 [file Table_5.xlsx]

## Sheet: Sheet1
Table S5 Genes enriched in sugar-acid pathway and hormone pathway
Serial Number	Genes	Short Name	Genes ID	S1	S2	S3	S4
1	sucrose synthase	SUS	Lsat_1_v5_gn_1_91940	1.46677	8.46869	6.76228	17.598
2			Lsat_1_v5_gn_5_138920	72.5583	205.405	158.095	111.86
3			Lsat_1_v5_gn_8_48680	0	16.578	16.0047	12.3311
4			Lsat_1_v5_gn_8_48760	1.22949	9.44311	10.3624	9.79794
5			Lsat_1_v5_gn_8_49880	2.76388	6.91866	8.66707	12.8947
6			Lsat_1_v5_gn_1_80200	10.4213	0.00425433	0	0
7			Lsat_1_v5_gn_9_58521	15.2415	6.01557	8.11481	8.32395
8	UTP--glucose-1-phosphate uridylyltransferase	UGP2	Lsat_1_v5_gn_3_67140	72.4102	161.925	199.655	197.955
9	ectonucleotide pyrophosphatase/phosphodiesterase family member 1/3	ENPP1_3	Lsat_1_v5_gn_7_37420	2.48827	5.01635	7.2025	6.73794
10			Lsat_1_v5_gn_6_52880	14.3244	8.27846	7.13546	5.03335
11			Lsat_1_v5_gn_7_37400	4.15497	3.63597	2.45168	1.42951
12			Lsat_1_v5_gn_9_66461	5.7671	3.75595	6.29006	7.27012
13	alpha-glucosidase	malZ	Lsat_1_v5_gn_4_150800	4.93454	1.9492	3.07284	2.41191
14	beta-fructofuranosidase	INV	Lsat_1_v5_gn_2_125041	17.1502	145.171	182.255	152.564
15			Lsat_1_v5_gn_2_125121	638.249	2652.92	3453.93	3343.42
16			Lsat_1_v5_gn_5_47780	26.9915	81.045	24.5265	17.0331
17			Lsat_1_v5_gn_6_41541	3.52575	12.043	9.73303	14.6756
18			Lsat_1_v5_gn_9_59600	6.97569	14.832	7.53368	7.47119
19			Lsat_1_v5_gn_2_128981	12.8304	1.82802	0.298261	1.4752
20			Lsat_1_v5_gn_5_48061	332.003	57.2819	61.5502	87.0208
21			Lsat_1_v5_gn_3_2180	8.83765	4.53617	13.3353	14.3656
22	fructokinase	scrK	Lsat_1_v5_gn_2_130100	1.6194	7.81213	5.12639	3.6728
23			Lsat_1_v5_gn_4_132241	20.1997	17.4084	44.5399	42.4608
24			Lsat_1_v5_gn_1_77921	175.166	82.8337	73.4332	73.457
25			Lsat_1_v5_gn_3_53720	16	10.5236	5.7906	4.19917
26			Lsat_1_v5_gn_5_154220	15.9105	10.7333	6.41616	5.0859
27	glucose-6-phosphate isomerase	GPI	Lactuca_sativa_newGene_4499	1.24354	0.262198	0.631292	0.331357
28	beta-glucosidase	E3.2.1.21	Lsat_1_v5_gn_7_107800	3.24303	22.3547	18.6455	79.2329
29			Lsat_1_v5_gn_9_23861	1.53424	33.033	3.54016	1.95034
30			Lsat_1_v5_gn_9_23900	1.88563	10.5706	4.27294	3.10634
31			Lsat_1_v5_gn_3_136061	19.1909	0.22406	0	0.0999343
32			Lsat_1_v5_gn_5_172380	75.4257	32.0258	51.726	46.1935
33			Lsat_1_v5_gn_9_97401	14.6964	0.78602	1.20602	1.12465
34			Lsat_1_v5_gn_4_60560	18.8304	23.9	33.5341	42.9662
35			Lsat_1_v5_gn_9_97200	11.6353	7.03362	4.34301	3.76399
36			Lsat_1_v5_gn_2_103761	67.2822	77.5609	65.5223	111.926
37			Lsat_1_v5_gn_8_1461	46.1115	34.2296	13.8967	9.94463
38	endoglucanase	E3.2.1.4	Lsat_1_v5_gn_3_10580	10.264	32.1278	31.0836	32.9941
39			Lsat_1_v5_gn_6_12340	119.33	241.882	330.234	261.412
40			Lsat_1_v5_gn_9_5920	2.5069	23.4289	24.3614	11.1351
41			Lactuca_sativa_newGene_1159	14.0936	4.20294	4.51896	6.21494
42			Lsat_1_v5_gn_3_14600	17.2914	1.14062	9.00534	2.98929
43			Lsat_1_v5_gn_4_13220	29.1227	10.0754	26.3743	14.2257
44			Lsat_1_v5_gn_8_163780	55.7122	13.8398	11.2067	11.946
45			Lactuca_sativa_newGene_5834	282.48	387.158	451.299	548.758
46	glucose-1-phosphate adenylyltransferase	glgC	Lsat_1_v5_gn_4_65361	9.45271	22.1108	15.1343	18.3117
47			Lsat_1_v5_gn_7_65521	10.1607	19.5993	9.37686	9.43738
48			Lsat_1_v5_gn_7_98980	26.8439	12.6023	7.74876	5.89579
49			Lsat_1_v5_gn_9_108380	15.8912	10.0606	5.0838	6.58162
50	granule-bound starch synthase	WAXY	Lsat_1_v5_gn_2_73301	2.95759	8.90513	6.10516	4.14999
51	starch synthase	glgA	Lsat_1_v5_gn_5_81081	7.1604	3.46891	8.16388	5.62678
52	1,4-alpha-glucan branching enzyme	glgB	Lsat_1_v5_gn_9_92360	8.64417	2.68371	1.98642	1.22138
53	beta-amylase	E3.2.1.2	Lsat_1_v5_gn_5_50601	0.389396	0.907467	1.61507	0.844623
54			Lsat_1_v5_gn_5_50720	0.279638	0.990436	1.46485	0.708539
55			Lsat_1_v5_gn_6_67781	14.0712	40.1385	26.5617	24.196
56			Lsat_1_v5_gn_8_129860	1.19762	7.78418	1.70493	1.10908
57			Lsat_1_v5_gn_3_15861	37.1832	23.812	7.90476	3.87067
58	alpha-amylase	AMY	Lsat_1_v5_gn_3_51421	8.26818	34.3937	12.847	19.4419
59			Lsat_1_v5_gn_2_118780	10.5285	4.03688	6.77263	5.06876
60			Lsat_1_v5_gn_2_82280	1.88216	0.7428	1.10918	0.761315
61			Lsat_1_v5_gn_2_87580	2.6376	0.774764	0.933338	1.22791
62			Lsat_1_v5_gn_8_14940	2.36144	1.9936	0.530418	1.84975
63	trehalose 6-phosphate phosphatase	otsB	Lsat_1_v5_gn_4_48100	72.2369	147.898	92.8499	187.139
64			Lsat_1_v5_gn_4_23560	25.871	10.1234	11.8866	8.93514
65			Lsat_1_v5_gn_4_6701	25.5248	9.30571	14.4909	11.5129
66			Lsat_1_v5_gn_8_65360	21.763	3.32523	5.63058	4.33336
67			Lsat_1_v5_gn_4_64821	0.434263	0.162789	0.0975703	0.16579
68			Lsat_1_v5_gn_7_100120	14.1184	21.432	8.79653	6.38507
69	raffinose synthase	E2.4.1.82	Lsat_1_v5_gn_0_32100	8.68136	47.3324	30.4464	33.4019
70			Lsat_1_v5_gn_5_92921	6.69857	3.66071	2.72127	2.38328
71	alpha-galactosidase	galA	Lsat_1_v5_gn_9_59740	10.2507	2.45753	2.84936	1.95552
72			Lsat_1_v5_gn_8_152721	28.0721	32.8416	36.7575	43.653
73			Lsat_1_v5_gn_2_107701	16.1936	13.7809	3.11213	1.75941
74	phosphoglucomutase	pgm	Lsat_1_v5_gn_4_13360	126.251	200.256	251.983	263.027
75	hexokinase	HK	Lsat_1_v5_gn_1_36821	4.29636	22.1884	67.6734	85.4528
76	aldose 1-epimerase	GALM	Lsat_1_v5_gn_4_177060	23.1451	11.3507	24.1919	13.1687
77	fructose-1,6-bisphosphatase I	FBP	Lsat_1_v5_gn_8_80661	19.2164	40.4385	28.1476	27.9641
78	6-phosphofructokinase 1	PFK	Lsat_1_v5_gn_4_64261	0.147679	2.0863	0.991665	14.2316
79			Lsat_1_v5_gn_7_82221	16.8426	4.45376	19.8509	26.2293
80			Lsat_1_v5_gn_2_95641	14.1014	9.59945	3.55089	3.64456
81			Lsat_1_v5_gn_6_41721	5.29155	4.74542	1.9129	2.04422
82			Lsat_1_v5_gn_6_70780	76.9727	45.7505	31.6418	29.0793
83			Lsat_1_v5_gn_8_88260	30.1169	47.95	48.9536	47.1631
84	diphosphate-dependent phosphofructokinase	PFP	Lsat_1_v5_gn_4_61781	8.22771	2.87017	1.60759	2.75361
85			Lsat_1_v5_gn_5_79180	0.807204	0	0	0
86			Lsat_1_v5_gn_7_15241	1.41375	1.93677	0.437426	0.537199
87			Lsat_1_v5_gn_2_3161	1.31235	1.52721	3.73661	3.43008
88			Lsat_1_v5_gn_4_61820	1.90814	2.32399	0.891602	0.654733
89			Lsat_1_v5_gn_4_61881	0.449203	0.948626	0.271967	0.538759
90	fructose-bisphosphate aldolase, class I	ALDO	Lsat_1_v5_gn_2_78480	87.2583	263.978	165.377	188.511
91			Lsat_1_v5_gn_7_116520	2.03533	12.2551	10.7674	15.4894
92	triosephosphate isomerase (TIM)	TPI	Lsat_1_v5_gn_2_119260	0.883152	3.2563	1.04493	2.61165
93			Lsat_1_v5_gn_2_119280	10.5	6.11085	3.856	2.20154
94			Lsat_1_v5_gn_7_39120	8.12716	64.2108	38.2909	2.38636
95	glyceraldehyde 3-phosphate dehydrogenase (phosphorylating)	GAPDH	Lsat_1_v5_gn_4_185661	5.15608	3.55322	7.62809	4.34063
96	2,3-bisphosphoglycerate-dependent phosphoglycerate mutase	PGAM	Lsat_1_v5_gn_1_4200	5.97268	2.31786	2.27803	2.62944
97			Lsat_1_v5_gn_6_102220	2.88828	0.199237	0.147046	0.237116
98	enolase	ENO	Lsat_1_v5_gn_1_50300	18.6161	7.83925	10.9343	6.93271
99			Lsat_1_v5_gn_2_129481	26.3677	29.1948	16.8647	11.5729
100	pyruvate kinase	PK	Lsat_1_v5_gn_6_56080	0.455103	1.47518	1.98646	1.54784
101			Lsat_1_v5_gn_2_135900	2.36618	3.26328	4.15783	3.5338
102	phosphoenolpyruvate carboxykinase (ATP)	pckA	Lsat_1_v5_gn_2_82001	13.7504	3.75706	11.2498	6.84344
103			Lsat_1_v5_gn_6_106641	0.991447	0.937689	0.211743	0.771552
104	ATP citrate (pro-S)-lyase	ACLY	Lsat_1_v5_gn_3_28540	123.921	20.5923	21.7836	29.6629
105	aconitate hydratase	ACO	Lsat_1_v5_gn_2_75441	1.09974	2.01552	2.35329	2.29768
106	2-oxoglutarate dehydrogenase E1 component	OGDH	Lsat_1_v5_gn_8_58500	0.015691	0.942673	0.692048	0.327725
107	2-oxoglutarate dehydrogenase E2 component (dihydrolipoamide succinyltransferase)	DLST	Lsat_1_v5_gn_4_59260	79.1242	102.28	128.558	162.003
108	succinate dehydrogenase (ubiquinone) flavoprotein subunit	SDHA	Lsat_1_v5_gn_0_30740	14.0683	38.0553	30.3482	44.842
109	malate dehydrogenase	MDH1	Lsat_1_v5_gn_9_114521	39.8547	72.8546	65.9637	66.063
110	aspartate aminotransferase, mitochondrial	GOT2	Lsat_1_v5_gn_4_56621	0.0319273	2.2769	4.74188	1.93226
111			Lsat_1_v5_gn_4_56721	0.19888	3.79319	9.09358	3.34232
112			Lsat_1_v5_gn_4_26660	2.80562	5.3069	1.88674	1.87569
113			Lsat_1_v5_gn_5_33281	14.6766	11.5888	10.6342	19.4394
114	amino-acid N-acetyltransferase	argAB	Lsat_1_v5_gn_2_131220	16.293	8.57669	7.40399	4.52432
115	isopentenyl-diphosphate Delta-isomerase	IDI	Lsat_1_v5_gn_2_17540	169.747	61.0462	72.3961	65.9656
116	adenylate dimethylallyltransferase (cytokinin synthase)	IPT	Lsat_1_v5_gn_9_4220	3.82417	5.20693	1.46762	1.7035
117			Lactuca_sativa_newGene_4531	2.62589	0.894415	1.45976	0.785788
118	cytokinin trans-hydroxylase	CYP735A	Lsat_1_v5_gn_3_79201	4.00529	1.79901	1.46892	1.55814
119	arabidopsis histidine kinase 2/3/4 (cytokinin receptor)	CRE1	Lsat_1_v5_gn_3_116581	0.77679	1.04642	1.44344	1.06703
120			Lsat_1_v5_gn_3_72520	0.237098	0.860734	0.793165	0.742867
121			Lsat_1_v5_gn_3_25440	3.8434	0.498086	1.60522	0.594835
122	two-component response regulator ARR-B family	B-ARR	Lsat_1_v5_gn_1_61300	5.18787	2.13711	1.76468	1.4482
123			Lsat_1_v5_gn_3_67301	8.87456	7.37226	3.34335	2.88093
124			Lsat_1_v5_gn_4_123520	3.06262	3.00928	1.15014	0.407627
125			Lsat_1_v5_gn_4_2361	1.55634	0.287055	0.194117	0.153563
126			Lsat_1_v5_gn_5_169461	14.5493	9.74151	4.52934	7.86326
127			Lsat_1_v5_gn_6_113721	4.48035	2.09359	1.66133	0.878027
128			Lsat_1_v5_gn_6_115080	7.20571	4.48326	2.55602	1.51399
129			Lsat_1_v5_gn_6_19461	1.35036	0.323785	0.313569	0.113236
130			Lsat_1_v5_gn_7_42681	4.73505	1.94744	1.89809	1.53941
131			Lsat_1_v5_gn_7_69101	10.8794	7.42654	3.25781	2.91795
132			Lsat_1_v5_gn_8_110900	1.03989	0.167523	0.00945867	0.0180297
133			Lsat_1_v5_gn_8_38620	8.64554	3.49621	1.95266	1.63385
134			Lsat_1_v5_gn_8_72921	16.2793	12.1285	4.55474	7.1827
135			Lsat_1_v5_gn_9_24661	3.61317	0.614489	0.115933	0.0758273
136			Lsat_1_v5_gn_7_87680	0.632303	0.828678	0.349722	2.59137
137			Lsat_1_v5_gn_3_20841	8.33036	7.6658	4.99937	3.04197
138	two-component response regulator ARR-A family	A-ARR	Lsat_1_v5_gn_1_115501	13.047	33.3191	28.1817	35.4653
139			Lsat_1_v5_gn_4_74061	29.2839	62.7905	83.1724	81.3704
140			Lsat_1_v5_gn_5_159621	2.44565	2.33914	4.68342	5.11925
141			Lsat_1_v5_gn_5_18120	6.80472	11.9234	11.8106	13.1947
142	aromatic-L-amino-acid/L-tryptophan decarboxylase	DDC	Lsat_1_v5_gn_4_140101	0.0703353	6.63703	1.65798	0.332551
143	aldehyde dehydrogenase NAD+	ALDH	Lsat_1_v5_gn_6_47421	2.19572	4.73162	0.979121	1.20271
144			Lsat_1_v5_gn_2_97681	2.28481	0.829367	0.064924	0.036622
145			Lsat_1_v5_gn_4_151120	11.2543	4.49533	4.3784	4.60496
146	indole-3-pyruvate monooxygenase	YUCCA	Lsat_1_v5_gn_1_48821	0.868564	2.61846	0.579785	0.691436
147			Lsat_1_v5_gn_3_28461	0.199389	0.615277	0.0861237	0.202336
148			Lsat_1_v5_gn_3_67000	6.74057	0	0.0617	0.0445827
149			Lsat_1_v5_gn_4_70920	9.49473	2.22475	1.65364	1.23387
150			Lsat_1_v5_gn_9_5281	2.36155	1.51993	0.564958	0.866781
151	auxin influx carrier (AUX1 LAX family)	AUX1	Lsat_1_v5_gn_8_100100	21.2027	12.5166	8.23906	9.90783
152	transport inhibitor response 1	TIR1	Lsat_1_v5_gn_5_188920	10.5054	14.6294	19.0726	9.14896
153			Lsat_1_v5_gn_0_45201	10.2936	2.24446	0.0366567	3.07267
154	auxin-responsive protein IAA	AUX/IAA	Lsat_1_v5_gn_1_34161	2.36635	16.2327	8.22147	16.2431
155			Lsat_1_v5_gn_5_129861	0.608888	1.75036	6.11892	3.09049
156			Lsat_1_v5_gn_4_101421	126.77	56.0202	52.996	44.2874
157			Lsat_1_v5_gn_5_186760	20.432	5.94077	6.49596	4.75163
158			Lsat_1_v5_gn_5_67581	277.271	102.189	92.019	102.365
159			Lsat_1_v5_gn_7_44161	4.09367	4.07984	0.999739	2.06682
160	auxin response factor	ARF	Lsat_1_v5_gn_2_100181	12.8677	23.8099	38.0312	34.8626
161			Lsat_1_v5_gn_5_139420	11.4598	12.6042	20.8122	16.8934
162			Lsat_1_v5_gn_7_35261	2.50223	14.4851	8.53923	18.7601
163			Lsat_1_v5_gn_8_20161	0.430099	2.40247	1.46728	3.3367
164			Lsat_1_v5_gn_5_81601	42.7727	14.2845	11.8831	12.3869
165			Lsat_1_v5_gn_7_57521	4.53254	0.766783	0.912881	0.740994
166	auxin responsive GH3 gene family	GH3	Lsat_1_v5_gn_5_116820	5.69334	71.9326	62.5931	133.467
167			Lsat_1_v5_gn_2_84761	2.09105	0	0.0105467	0.0365513
168			Lsat_1_v5_gn_5_6221	5.8594	1.8499	0.491692	0.501309
169			Lsat_1_v5_gn_7_107201	17.4817	2.98725	2.12959	1.98905
170			Lsat_1_v5_gn_8_132240	2.40929	0.932264	0.795897	0.56198
171			Lsat_1_v5_gn_8_53361	5.61737	0.578213	0.55449	0.422351
172	ent-kaurene oxidase	CYP701	Lsat_1_v5_gn_6_114080	7.9414	1.81381	1.01078	1.13615
173	ent-kaurenoic acid monooxygenase	KAO	Lsat_1_v5_gn_4_107280	1.17988	0.68461	0.48	0.185579
174			Lsat_1_v5_gn_4_41921	23.3198	3.10817	5.37955	5.01121
175	gibberellin-44 dioxygenase	GA20ox	Lsat_1_v5_gn_9_53021	10.1765	3.79822	7.73761	7.76509
176	gibberellin 3beta-dioxygenase	GA3ox	Lsat_1_v5_gn_1_34061	0.0291847	1.53318	1.33716	0.573637
177			Lsat_1_v5_gn_5_133201	3.30255	0.872791	1.33868	0.415939
178			Lsat_1_v5_gn_7_4621	1.16608	0.244727	0.10281	0.011941
179	gibberellin receptor GID1	GID1	Lsat_1_v5_gn_4_31120	2.33972	0.711154	1.30959	4.4205
180			Lsat_1_v5_gn_2_65001	13.1373	19.4603	22.8541	19.856
181			Lsat_1_v5_gn_7_50360	0.232729	0.495969	1.75378	0.718486
182			Lsat_1_v5_gn_4_31100	8.51737	1.88482	1.60951	5.34987
183			Lsat_1_v5_gn_7_50340	1.10299	0.158339	0.110499	0.267872
184			Lsat_1_v5_gn_5_188620	30.8874	12.3114	24.6502	19.3418
185	DELLA protein	DELLA	Lsat_1_v5_gn_4_129880	55.7347	22.9208	27.019	19.0236
186			Lsat_1_v5_gn_6_109301	10.3443	26.5358	17.591	19.5297
187			Lsat_1_v5_gn_1_23100	3.32671	7.9182	18.9833	11.9069
188	phytochrome-interacting factor 4	TF	Lsat_1_v5_gn_4_164941	6.93637	2.46084	2.89678	1.72751
189			Lsat_1_v5_gn_3_129041	4.18762	16.8557	1.36496	1.581
190			Lsat_1_v5_gn_9_11161	18.3043	9.28207	6.36101	3.82397
191	beta-ring hydroxylase	LUT5	Lsat_1_v5_gn_1_58321	29.8728	71.7038	52.256	93.655
192	beta-carotene 3-hydroxylase	crtz	Lsat_1_v5_gn_9_56521	15.9712	80.3814	109.356	233.961
193	zeaxanthin epoxidase	ZEP	Lsat_1_v5_gn_9_111181	5.37778	2.50408	1.914	2.62748
194			Lsat_1_v5_gn_3_90761	27.3131	83.382	55.079	51.1267
195	9-cis-epoxycarotenoid dioxygenase	NCED	Lsat_1_v5_gn_1_6181	8.31545	14.6053	31.4348	26.6623
196			Lsat_1_v5_gn_5_120740	0.312128	2.25283	3.45171	9.79215
197			Lsat_1_v5_gn_6_15161	11.6223	68.1724	92.371	74.595
198			Lsat_1_v5_gn_7_100040	1.81279	17.6237	13.1447	17.9728
199			Lsat_1_v5_gn_7_28540	1.64708	3.03671	4.06054	4.42065
200	xanthoxin dehydrogenase	ABA2	Lsat_1_v5_gn_4_50160	15.3566	16.5615	5.96447	4.62794
201			Lsat_1_v5_gn_2_105900	3.59052	25.9384	21.3598	24.7596
202			Lsat_1_v5_gn_5_19200	6.35575	24.5248	19.7097	23.9727
203			Lsat_1_v5_gn_9_39540	6.22656	22.3695	18.9147	25.2902
204			Lsat_1_v5_gn_6_78240	3.30437	0.0286613	1.07208	0.449235
205			Lsat_1_v5_gn_8_61301	1.8577	0.512575	0.322876	1.07239
206			Lsat_1_v5_gn_9_5220	33.1955	9.05564	28.452	19.8241
207	abscisic acid receptor PYR/PYL family	PYR/PYL	Lsat_1_v5_gn_1_42501	47.4023	72.8106	6.09103	8.5433
208			Lsat_1_v5_gn_2_125581	22.8096	10.7584	8.77494	8.77274
209			Lsat_1_v5_gn_3_139520	42.3601	12.5522	15.9071	11.1616
210			Lsat_1_v5_gn_3_17760	56.7612	14.8214	21.2691	15.3058
211			Lsat_1_v5_gn_8_103121	91.5742	15.1054	16.3216	12.6554
212			Lsat_1_v5_gn_8_13081	3.94531	1.18486	1.02266	1.53608
213			Lsat_1_v5_gn_9_37560	105.59	23.8444	35.6164	19.3263
214	protein phosphatase 2C	PP2C	Lsat_1_v5_gn_2_118601	24.1272	102.122	107.517	87.3769
215			Lsat_1_v5_gn_5_46941	0.356945	0.45067	1.23547	0.175364
216			Lsat_1_v5_gn_7_40440	4.63365	41.768	53.0737	51.3694
217			Lsat_1_v5_gn_9_24061	17.196	89.8686	46.0518	67.673
218			Lsat_1_v5_gn_7_66420	1.80638	0	0	0
219			Lsat_1_v5_gn_9_53561	6.68231	5.22793	2.46357	3.83997
220	serine/threonine-protein kinase SRK2	SnRK2	Lsat_1_v5_gn_4_143260	3.02052	16.9306	20.8607	24.8722
221			Lsat_1_v5_gn_5_47341	8.06576	17.9152	23.6787	17.6573
222			Lsat_1_v5_gn_3_15481	28.1579	3.61509	4.18595	4.05773
223			Lsat_1_v5_gn_3_92480	0.923483	0.46249	0.0744513	0.0527907
224			Lsat_1_v5_gn_1_78921	0.015411	2.88964	1.10358	1.57472
225			Lsat_1_v5_gn_6_94561	1.14368	2.34134	0.581262	0.67521
226	ABA responsive element binding factor	ABF	Lsat_1_v5_gn_9_111061	12.7446	123.083	47.8942	21.2629
227			Lsat_1_v5_gn_7_86800	9.31686	18.6353	12.2302	9.96165
228	phospholipase A1	DAD1	Lsat_1_v5_gn_1_24360	1.38814	16.104	3.60874	9.19435
229			Lsat_1_v5_gn_4_13301	1.39586	16.7615	7.49595	11.4485
230			Lsat_1_v5_gn_4_165541	40.0773	308.369	284.377	267.273
231			Lsat_1_v5_gn_6_94020	5.04836	33.5315	29.5482	54.1546
232			Lsat_1_v5_gn_7_29201	11.4384	114.932	79.2197	115.174
233			Lsat_1_v5_gn_8_2401	5.97832	1.60447	2.098	2.24944
234	allene oxide cyclase	AOC	Lsat_1_v5_gn_4_153121	127.102	272.049	198.274	495.383
235	12-oxophytodienoic acid reductase	OPR	Lsat_1_v5_gn_4_68641	22.146	2.78273	2.04268	1.57937
236			Lsat_1_v5_gn_7_75541	5.12785	0.99805	1.00467	0.866105
237			Lsat_1_v5_gn_5_141041	39.0537	67.1699	45.2692	90.8228
238			Lsat_1_v5_gn_4_68701	51.5796	75.4093	30.8492	51.8019
239			Lsat_1_v5_gn_7_75581	2.03479	2.71497	0.609102	0.620009
240	OPC-8:0 CoA ligase 1	OPCL1	Lsat_1_v5_gn_8_28060	41.46	151.367	106.152	272.336
241	enoyl-CoA hydratase/3-hydroxyacyl-CoA dehydrogenase	MFP2	Lsat_1_v5_gn_2_77700	5.96594	0	0	0
242	acyl-CoA oxidase	ACOX1	Lsat_1_v5_gn_4_28520	13.1914	1.65071	1.36334	1.76562
243			Lsat_1_v5_gn_6_18061	42.8573	43.9426	44.3675	66.8805
244	acetyl-CoA acyltransferase 1	ACAA1	Lsat_1_v5_gn_5_179700	25.6928	20.5597	25.0559	70.5925
245	jasmonic acid-amino synthetase	JAR1	Lsat_1_v5_gn_4_34281	7.63779	11.521	12.5576	52.7705
246	coronatine-insensitive protein 1	COI1	Lsat_1_v5_gn_8_12401	11.6049	4.85623	5.03325	3.45001
247	jasmonate ZIM domain-containing protein	JAZ	Lsat_1_v5_gn_1_37841	69.2961	152.839	93.1258	132.408
248			Lsat_1_v5_gn_3_31461	45.7776	154.469	116.43	248.12
249			Lsat_1_v5_gn_4_91521	47.8444	104.487	102.692	81.2097
250			Lsat_1_v5_gn_5_137041	39.2718	172.62	148.739	247.408
251			Lsat_1_v5_gn_7_28101	10.4238	66.5857	56.1916	116.01
252			Lsat_1_v5_gn_8_85820	225.396	407.31	315.009	388.215
253			Lsat_1_v5_gn_5_139561	221.14	351.427	432.027	485.153
254			Lsat_1_v5_gn_8_23980	8.73916	8.20341	13.0868	16.1637
255	transcription factor MYC2	MYC2	Lsat_1_v5_gn_3_140101	9.26528	44.3316	37.7744	63.5935
256			Lsat_1_v5_gn_3_17861	89.3069	254.329	207.801	218.251
257			Lsat_1_v5_gn_4_158841	0.122491	6.42382	3.47858	15.9926
258			Lsat_1_v5_gn_4_33781	41.4624	95.429	115.551	141.595
259			Lsat_1_v5_gn_5_110681	0.420662	1.32931	2.90086	5.51335
260			Lsat_1_v5_gn_9_114500	3.70357	4.17067	9.59375	9.09455
261			Lsat_1_v5_gn_4_32381	11.9898	3.77467	4.2858	5.04731
262			Lsat_1_v5_gn_3_84261	0.08376	2.68937	1.8518	10.4702
263			Lsat_1_v5_gn_5_190001	0.853964	3.70065	0	0.120531
264			Lsat_1_v5_gn_4_158881	0.016821	0.188846	0.130465	1.75693
265			Lsat_1_v5_gn_4_158921	0.0314157	0.386482	0.397179	1.98362
266			Lsat_1_v5_gn_5_83461	5.5857	7.00916	6.44926	31.68
267			Lsat_1_v5_gn_7_83480	0.281521	0.612098	0.913704	16.0285
