# Supplementary material for: Combined analysis of the transcriptome and metabolome provides insights into the fleshy stem expansion mechanism in stem lettuce
Source: Front Plant Sci. 2022 Dec 15;13:1101199. doi: 10.3389/fpls.2022.1101199 (PMC9798005; doi:10.3389/fpls.2022.1101199)
Supplement: Supplementary file 6 [file Table_6.xlsx]

## Sheet: Sheet1
Table S6 Metabolites enriched in the sugar-acid pathway and hormone pathway
	name	name	S1	S2	S3	S4
Metabolites in the Hormone Pathway	pos_meta_739	alpha-Linolenic acid	2.1458e-05	1.05602e-05	1.33539e-05	1.36856e-05
	neg_meta_47	(±)7-epi Jasmonic Acid	8.46821e-06	5.7462e-06	1.08759e-05	2.34347e-05
	pos_meta_264	(±)7-epi Jasmonic Acid	1.96213e-05	1.35257e-05	1.47676e-05	2.12694e-05
	neg_meta_120	Lysyl-Tryptophan	0.000596022	0.000381897	0.000238578	0.000283541
	pos_meta_462	Lysyl-Tryptophan	1.43968e-05	3.98457e-07	8.90963e-06	3.19646e-06
	neg_meta_272	4-Hydroxyphenylpyruvate	8.01223e-05	5.43003e-05	5.41985e-05	4.40744e-05
	pos_meta_486	(+)-Abscisic acid	4.78479e-05	4.7536e-05	3.75053e-05	4.01795e-05
	pos_meta_534	Jasmonic acid	1.99927e-05	1.8373e-05	9.05656e-08	1.83029e-07
	neg_meta_132	Jasmonic acid	2.69123e-06	5.87436e-06	2.51296e-06	2.54154e-06
Metabolites in the Glucose-Acid Pathway	neg_meta_35	Sucrose	0.0826157	0.0777994	0.0731659	0.0689524
	pos_meta_406	Sucrose	0.00209464	0.00104794	0.00115707	0.00106062
	pos_meta_777	UDP-glucose	2.84737e-05	3.12781e-05	2.63953e-05	3.81771e-05
	neg_meta_6	Cellobiose	0.00129054	0.00214445	0.00187225	0.00204491
	pos_meta_596	Glycogen	3.3472e-05	7.17935e-06	5.68322e-05	8.18216e-05
	pos_meta_456	Raffinose	3.79582e-07	0	5.23946e-06	7.83329e-06
	neg_meta_38	Stachyose	0.0113131	0.0365787	0.0337964	0.0355135
	pos_meta_208	Stachyose	0.00159908	0.00677591	0.0087097	0.00670341
	pos_meta_903	Galactaric acid	1.76819e-05	3.56721e-05	5.70489e-05	8.75015e-05
	neg_meta_214	Fructose 1-phosphate	2.05531e-05	0	0	0
	neg_meta_249	3-Phospho-D-glycerate(G3P)	3.81285e-08	7.97216e-06	2.7482e-05	4.21765e-05
	neg_meta_39	DL-Glyceraldehyde 2-Phosphate(G2P)	0	3.66373e-07	4.69775e-06	5.61602e-06
	pos_meta_108	Phenylpyruvic acid	0.000850108	0.000560547	0.000598518	0.000712756
	neg_meta_32	Citric acid	0.00442116	0.00340281	0.00284289	0.0036904
	neg_meta_3	L-Malic acid	0.00712201	0.00398591	0.00385209	0.0046991
	neg_meta_124	Argininosuccinic acid	2.77412e-05	2.55163e-05	5.62313e-06	3.76118e-06
	pos_meta_857	Argininosuccinic acid	0	1.89425e-05	2.34132e-05	3.19104e-05
	neg_meta_155	Arginyl-Arginine	1.91219e-05	4.34074e-07	0	0
	pos_meta_19	L-Valine	0.000293775	0.000348206	0.000532199	0.000693088
	pos_meta_441	L-Leucine	1.63409e-05	1.15107e-05	1.09482e-05	8.47844e-06
	neg_meta_26	L-Glutamate	5.3965e-05	2.99823e-05	2.53972e-05	8.6596e-05
	pos_meta_682	N-Acetyl-L-glutamate	9.48812e-05	7.30343e-05	6.64326e-05	6.92916e-05
